# Supplementary material for: Levofloxacin reposition-based design: synthesis, biological evaluation of new levofloxacin derivatives targeting topoisomerase II beta polymerase as promising anticancer agents, molecular docking, and physicochemical characterization
Source: PubMed Central journal article supplement (PMC11369887; doi:10.1039/d4ra03975k), 2024-09-03

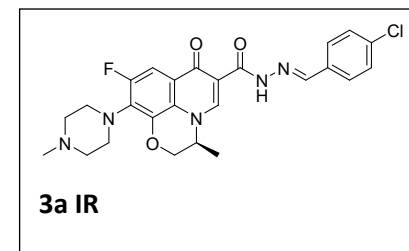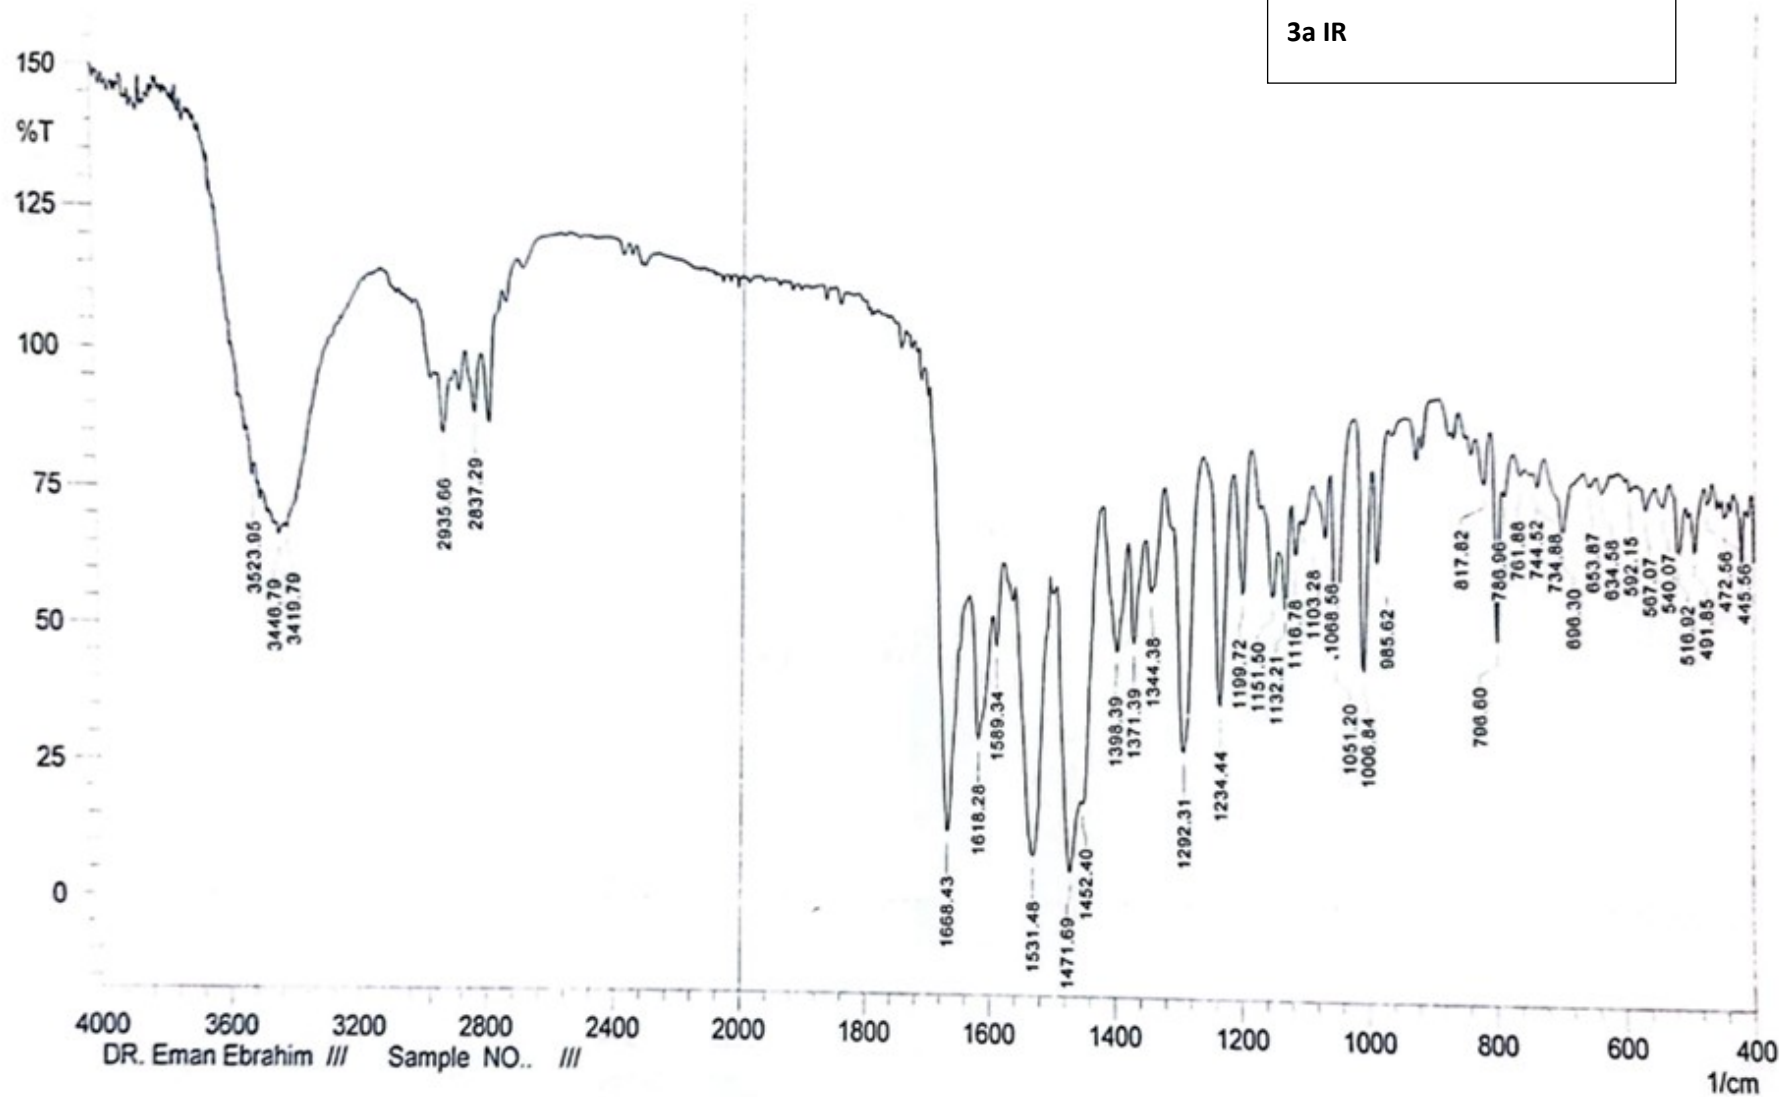

Comment:  
DR. Eman Ebrahim /// Sample NO.. ///

\*\*Prepared By : Dr.Ahmed A.EL-Wakeel , Ph.D.

Date/Time; 4/30/2010 3:03:02 AM

No. of Scans; 10

Resolution; 4 [1/cm]

Apodization; Happ-Genzel

User; Heinrich

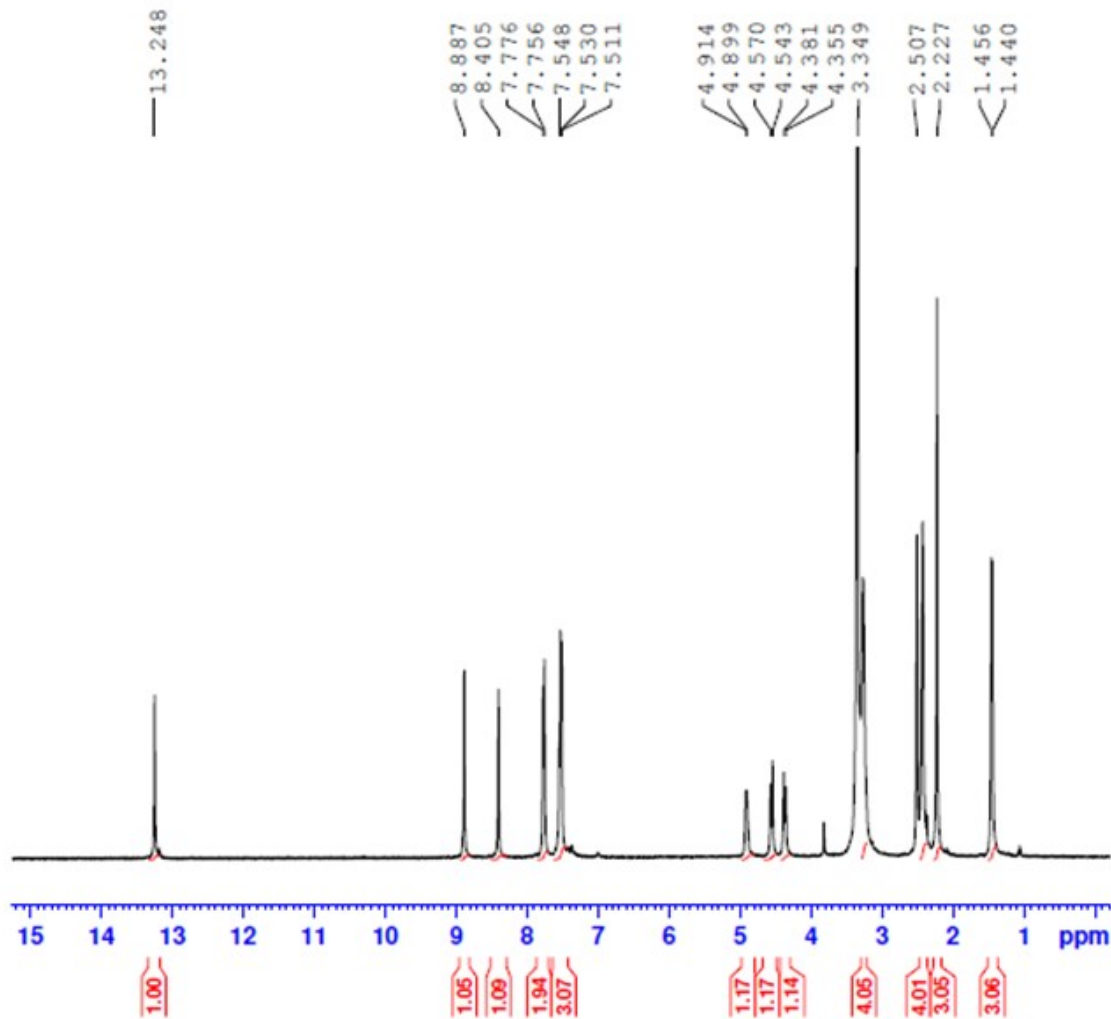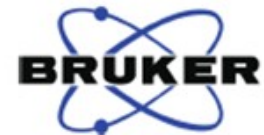

Current Data Parameters  
 NAME amira-youssef 4c1  
 EXPNO 1  
 PROCNO 1

F2 - Acquisition Parameters  
 Date\_ 20211212  
 Time 16.31  
 INSTRUM spect  
 PROBHD 5 mm PABBO BB/  
 PULPROG zg30  
 TD 65536  
 SOLVENT DMSO  
 NS 20  
 DS 2  
 SWH 8012.820 Hz  
 FIDRES 0.122246 Hz  
 AQ 4.9894465 sec  
 RG 205.37  
 DW 62.400 usec  
 DE 6.50 usec  
 TK 300.0 K  
 D1 1.00000000 sec  
 TD0 1

----- CHANNEL f1 -----  
 SFO1 400.1524711 MHz  
 NUC1 1H  
 P1 12.00 usec  
 PLW1 18.00000000 W

F2 - Processing parameters  
 SI 65536  
 SF 400.1500000 MHz  
 WDW EM  
 SSB 0  
 LB 0.30 Hz  
 GB 0  
 PC 1.00

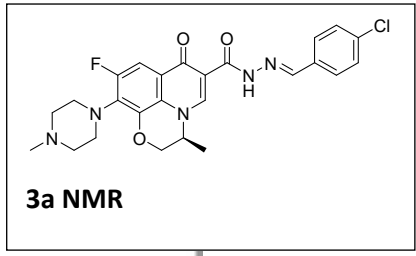

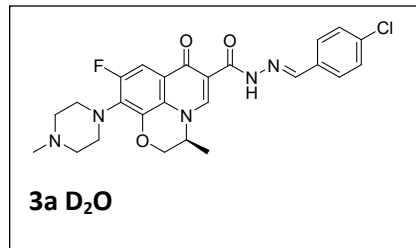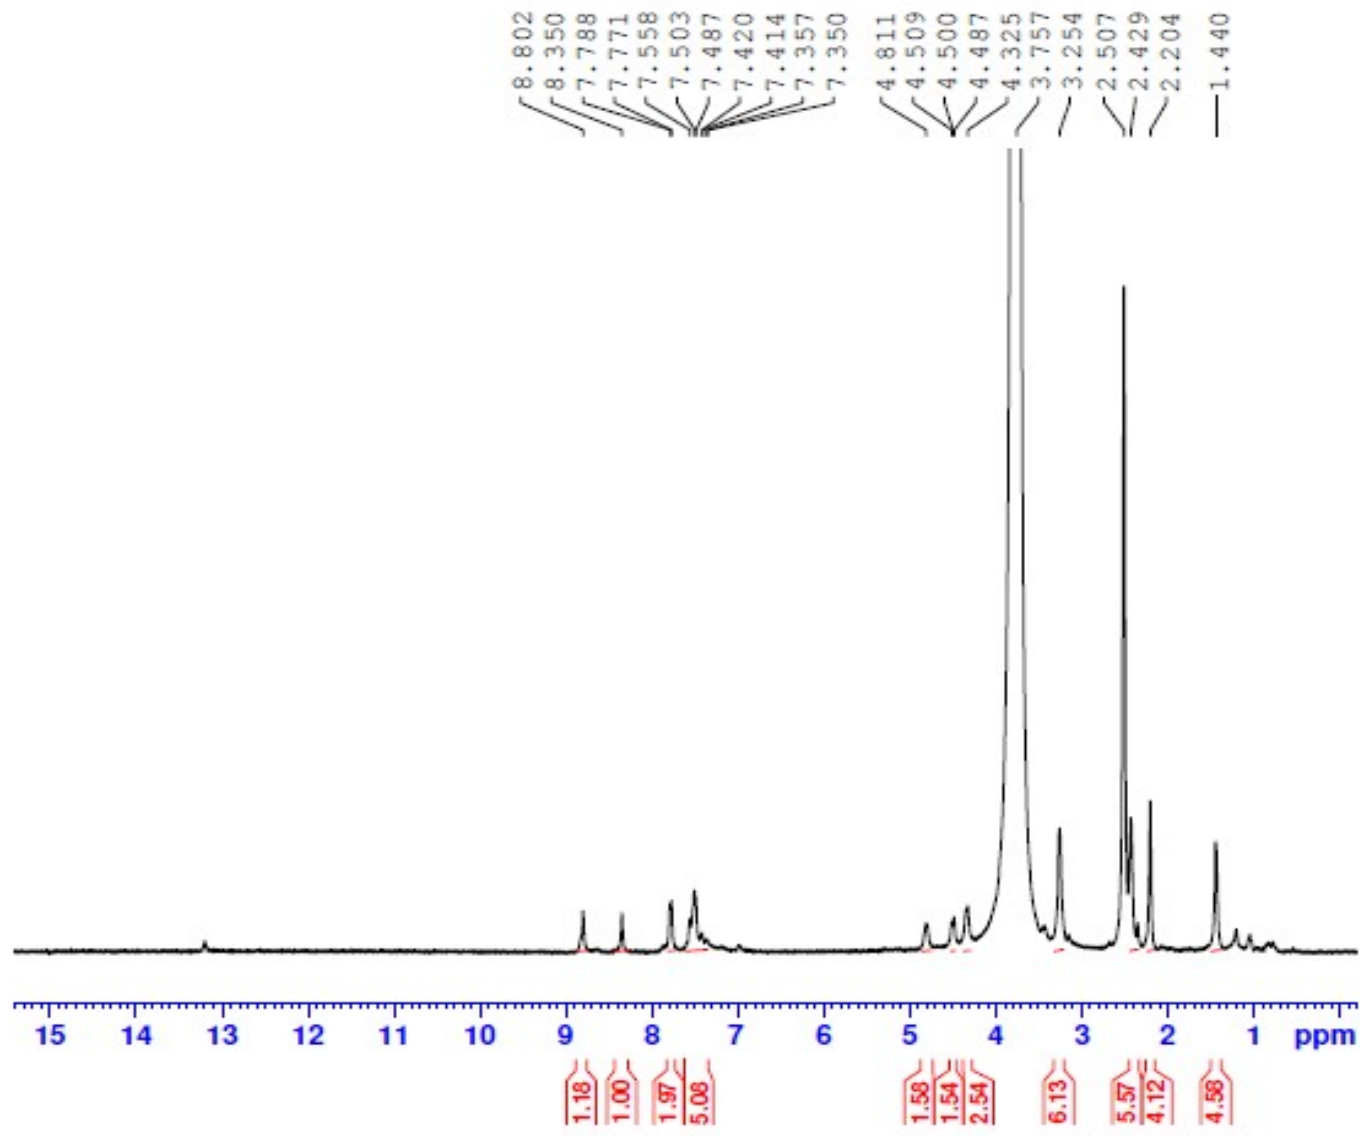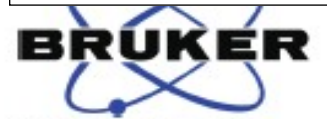

Current Data Parameters  
 NAME amira-youssef-chalc-4cl-d2o  
 EXPNO 1  
 PROCNO 1

F2 - Acquisition Parameters  
 Date\_ 20211226  
 Time 12.07  
 INSTRUM spect  
 PROBRD 5 mm PABBO BB/  
 PULPROG zg30  
 TD 65536  
 SOLVENT DMSO  
 NS 128  
 DS 2  
 SWH 8012.820 Hz  
 FIDRES 0.122266 Hz  
 AQ 4.0894465 sec  
 RG 164.32  
 DW 62.400 usec  
 DE 6.50 usec  
 TK 300.0 K  
 D1 1.00000000 sec  
 TD0 1

CHANNEL f1  
 SFO1 400.1524711 MHz  
 NUC1 1H  
 P1 12.00 usec  
 P1M1 18.00000000 W

F2 - Processing parameters  
 SI 65536  
 SF 400.1500000 MHz  
 WDW EM  
 SSB 0  
 LB 0.30 Hz  
 GB 0  
 PC 1.00

Amira Youssef\_C\_4-Cl

Microanalytical Unit - FOPCU - NMR laboratory  
www.pharma.cu.edu.eg dir-mau.fopcu@pharma.cu.edu.eg

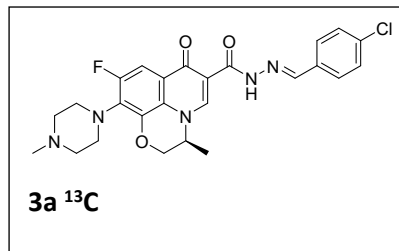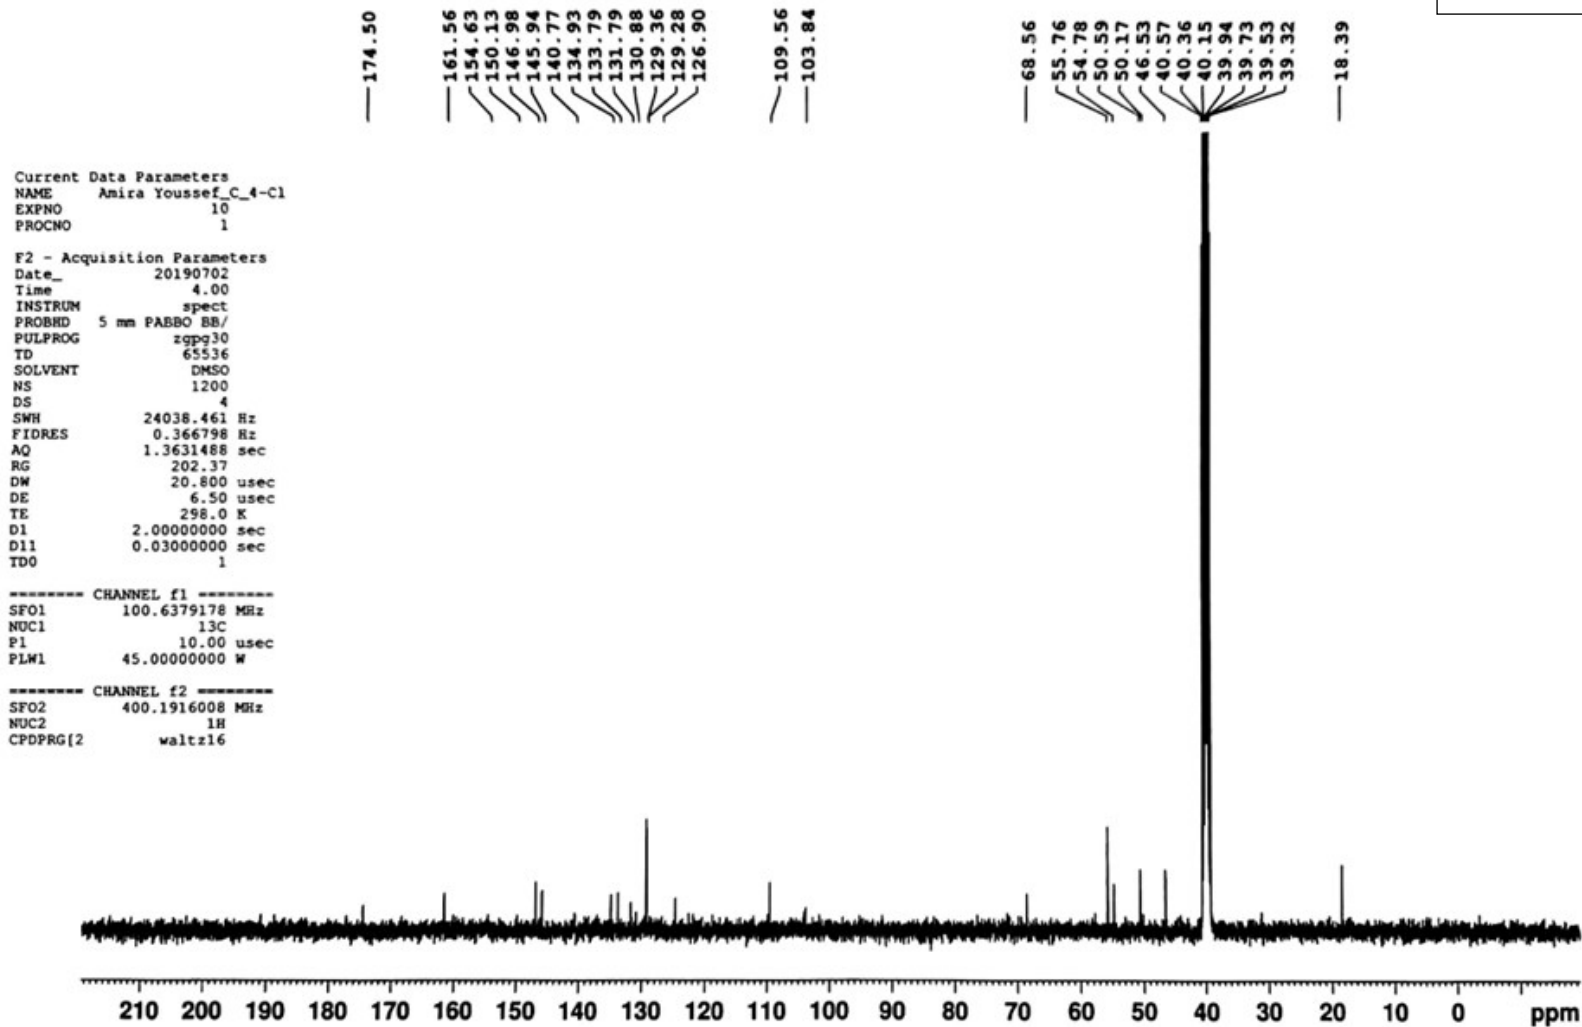



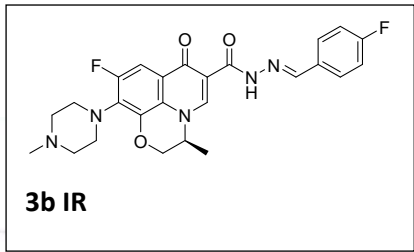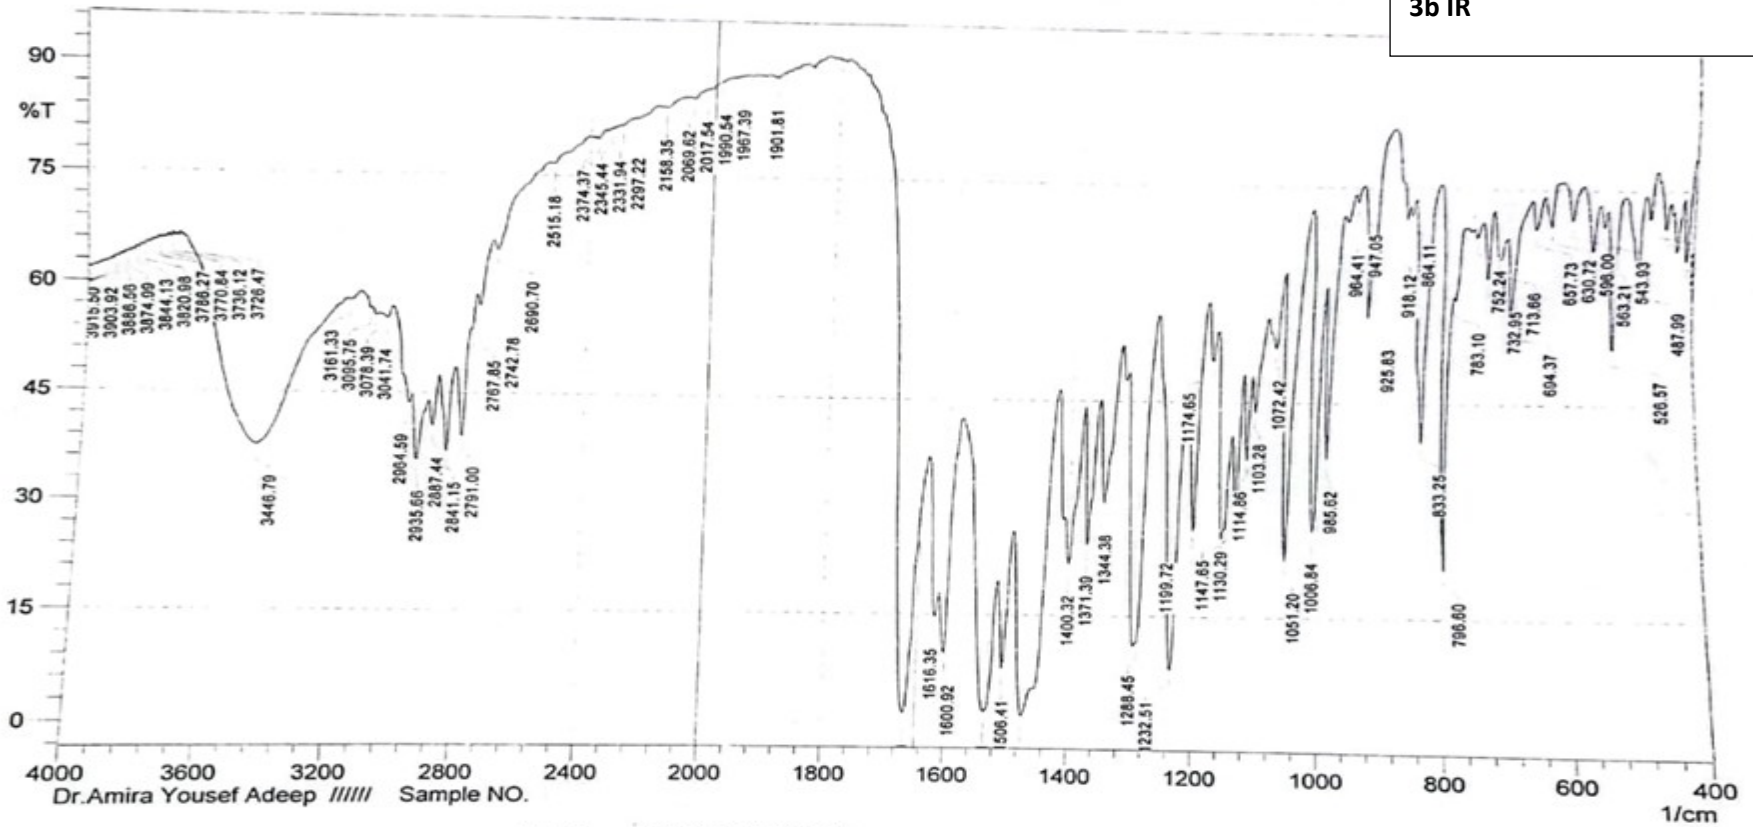

Comment;  
Dr.Amira Yousef Adeep // Sample NO. (P-F

Date/Time; 4/29/2010 11:18:05 PM  
No. of Scans; 10  
Resolution; 4 [1/cm]  
Apodization; Happ-Genzel  
User; Heinrich

\*\*Prepared By : Dr.Ahmed A.EL-Wakeel , Ph.D.

Amira Yousef\_H\_P-F

Microanalytical Unit - FOPCU - NMR laboratory  
www.pharma.cu.edu.eg dir-mau.fopcu@pharma.cu.edu.eg

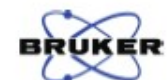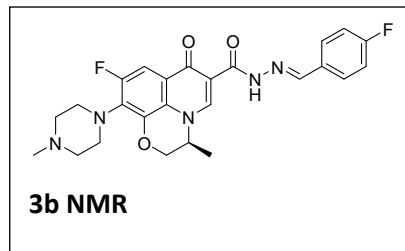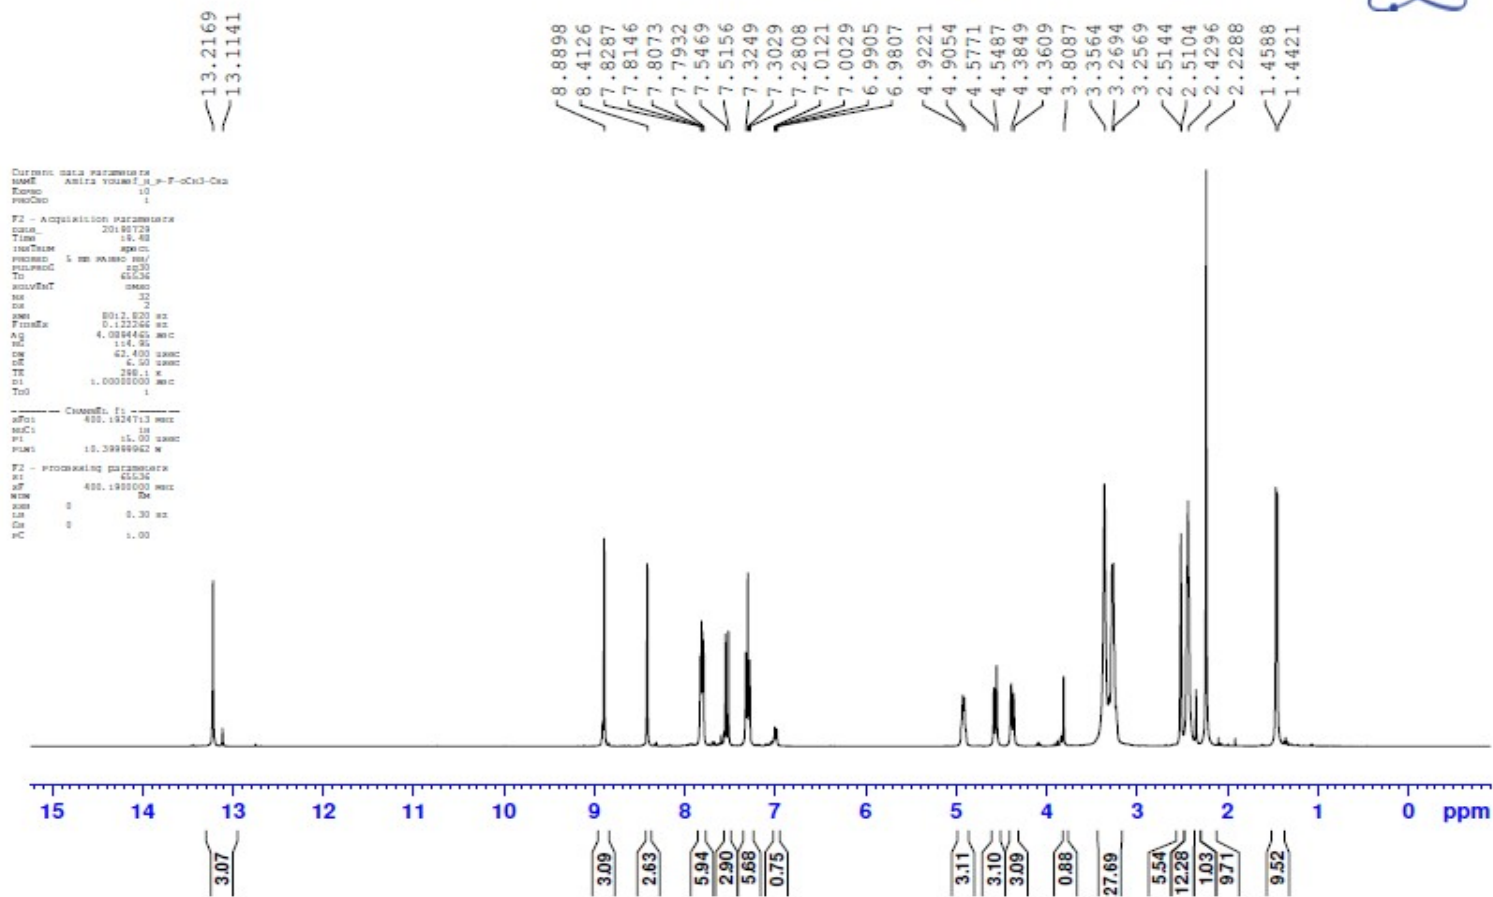

Amira Yousef\_C\_P-F-

Microanalytical Unit - FOPCU - NMR laboratory  
www.pharma.cu.edu.eg dir-mau.fopcu@pharma.cu.edu.eg

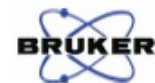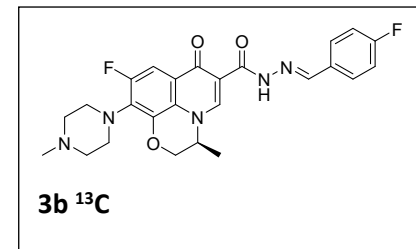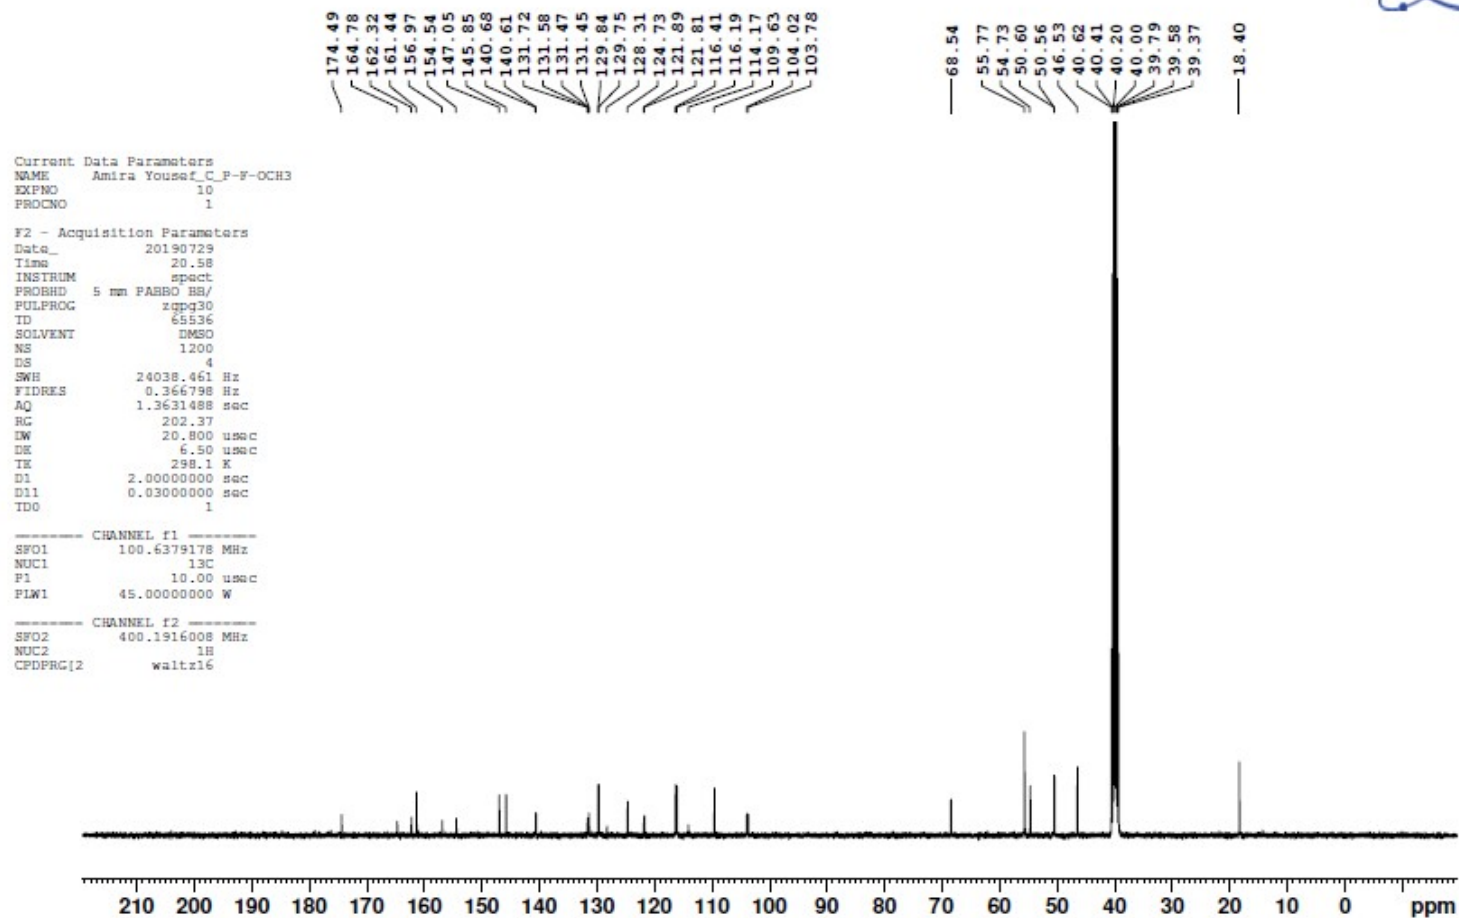

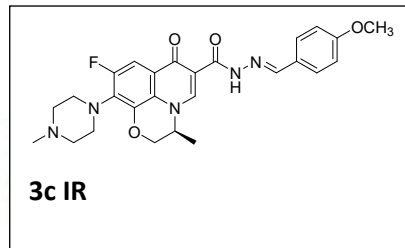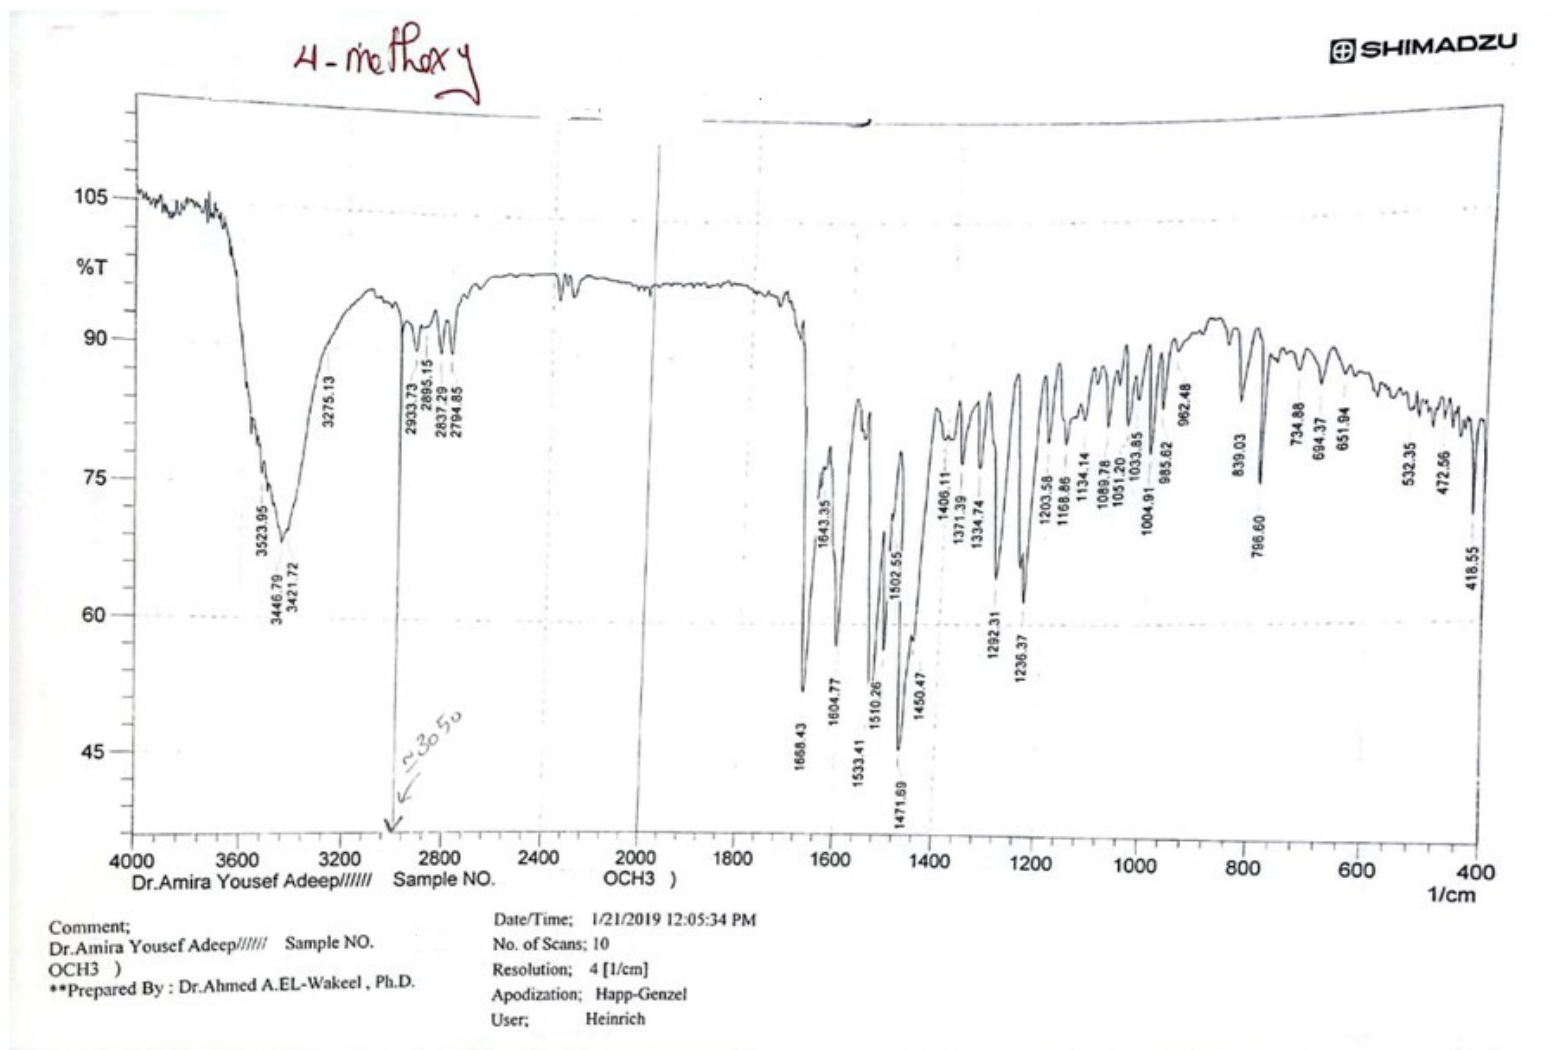

Amira Yousef\_H\_OCH3

Microanalytical Unit - FOPCU - NMR laboratory  
www.pharma.cu.edu.eg dir-mau.fopcu@pharma.cu.edu.eg

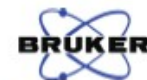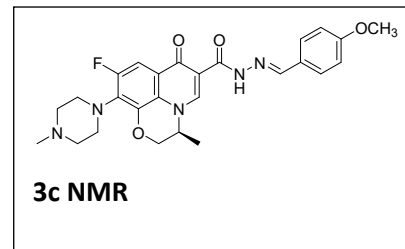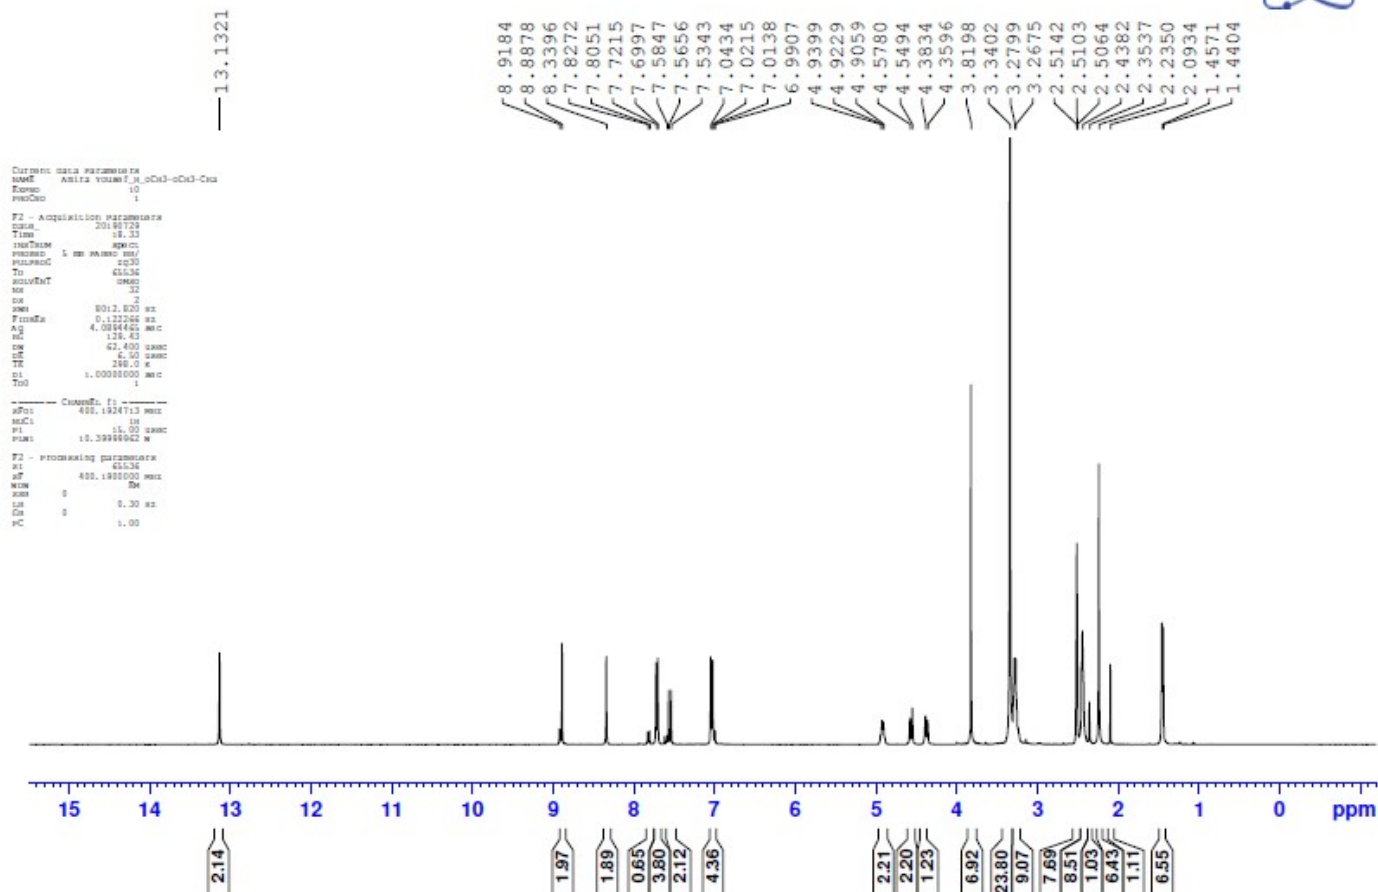

Amira Yousef\_C\_OCH3

Microanalytical Unit - FOPCU - NMR laboratory  
www.pharma.cu.edu.eg dir-mau.fopcu@pharma.cu.edu.eg

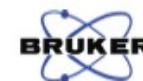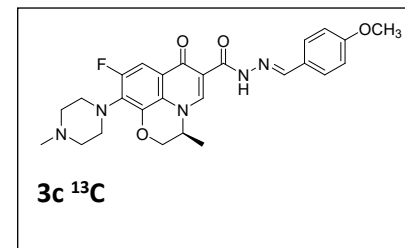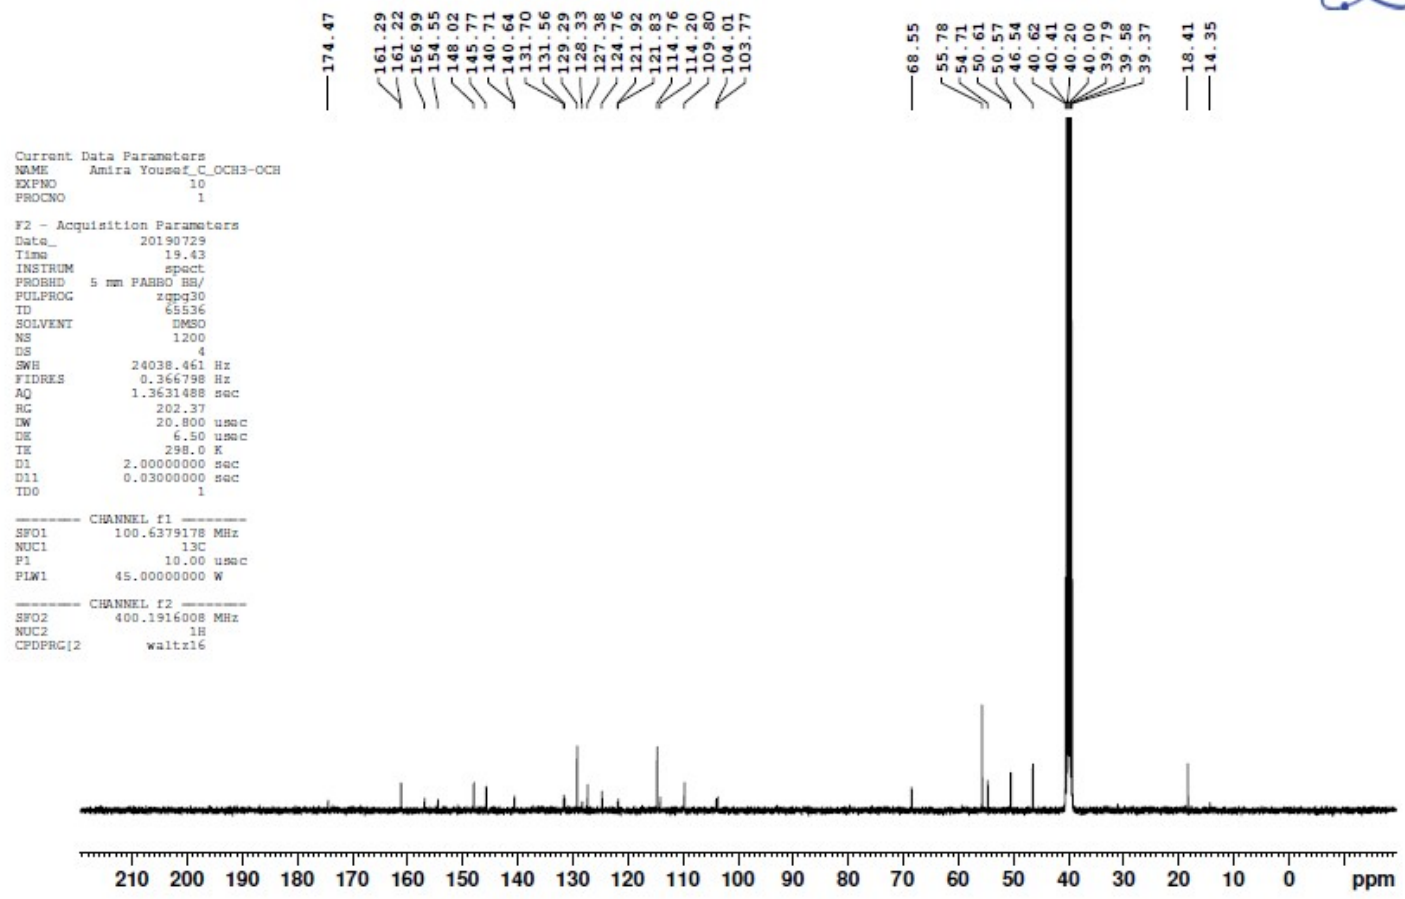

Isatin

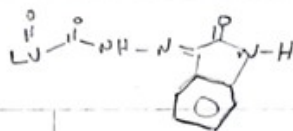

SHIMADZU

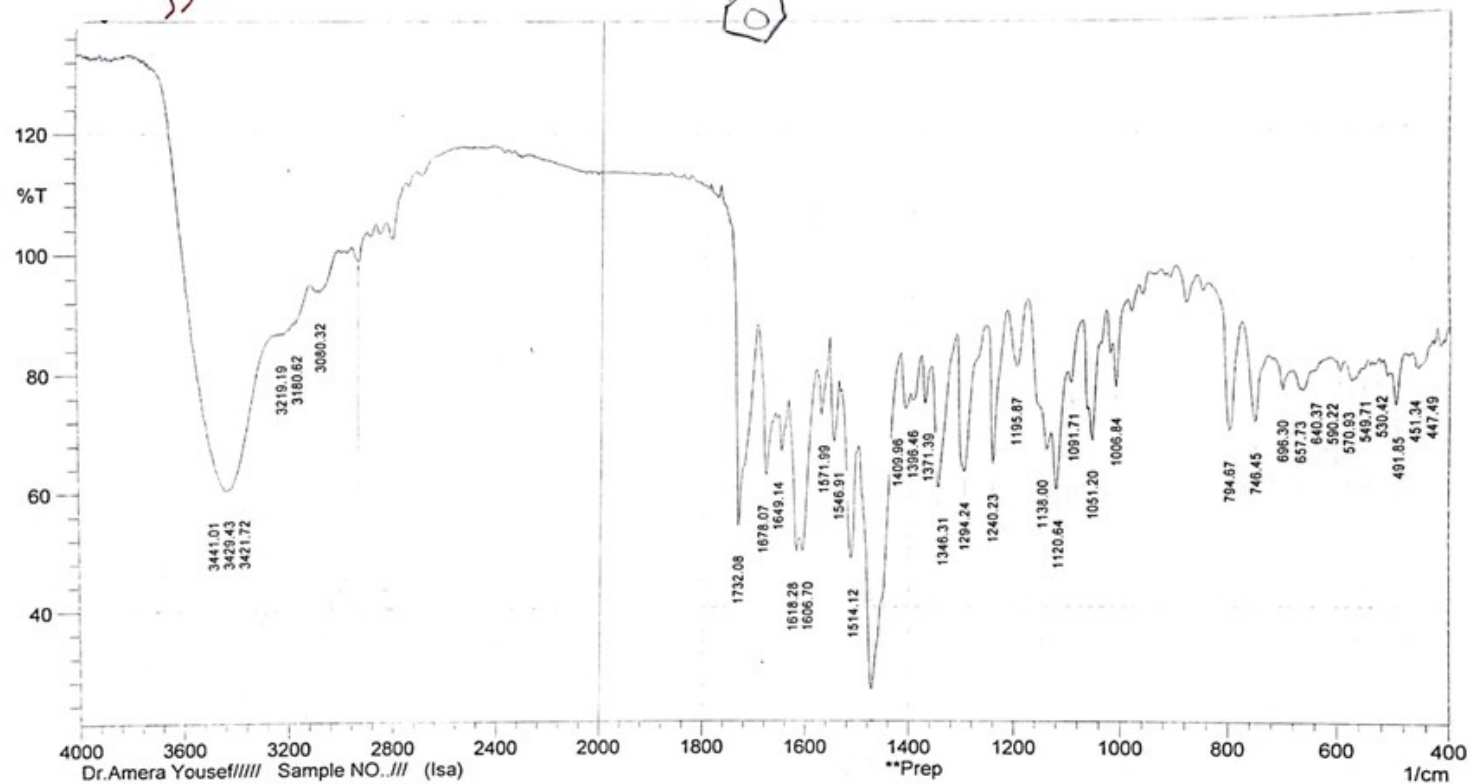

Comment:  
Dr.Amera Yousef///// Sample NO./// (Isa)  
\*\*Prepared By : Dr.Ahmed A.EL-Wakeel , Ph.D.

Date/Time; 4/29/2010 11:32:51 PM  
No. of Scans; 10  
Resolution; 4 [1/cm]  
Apodization; Happ-Genzel  
User; Heinrich

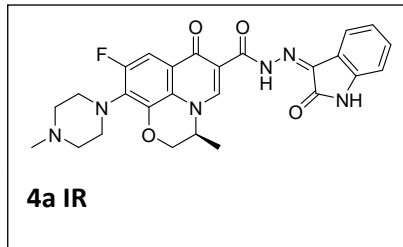



Amira Youssef\_H\_Isatin

Microanalytical Unit - FOPCU - NMR laboratory  
www.pharma.cu.edu.eg dir-mau.fopcu@pharma.cu.edu.eg

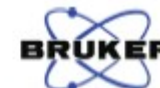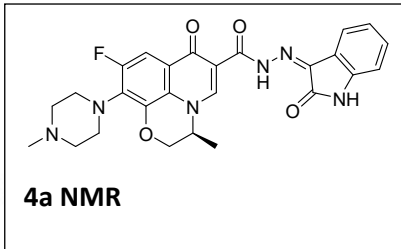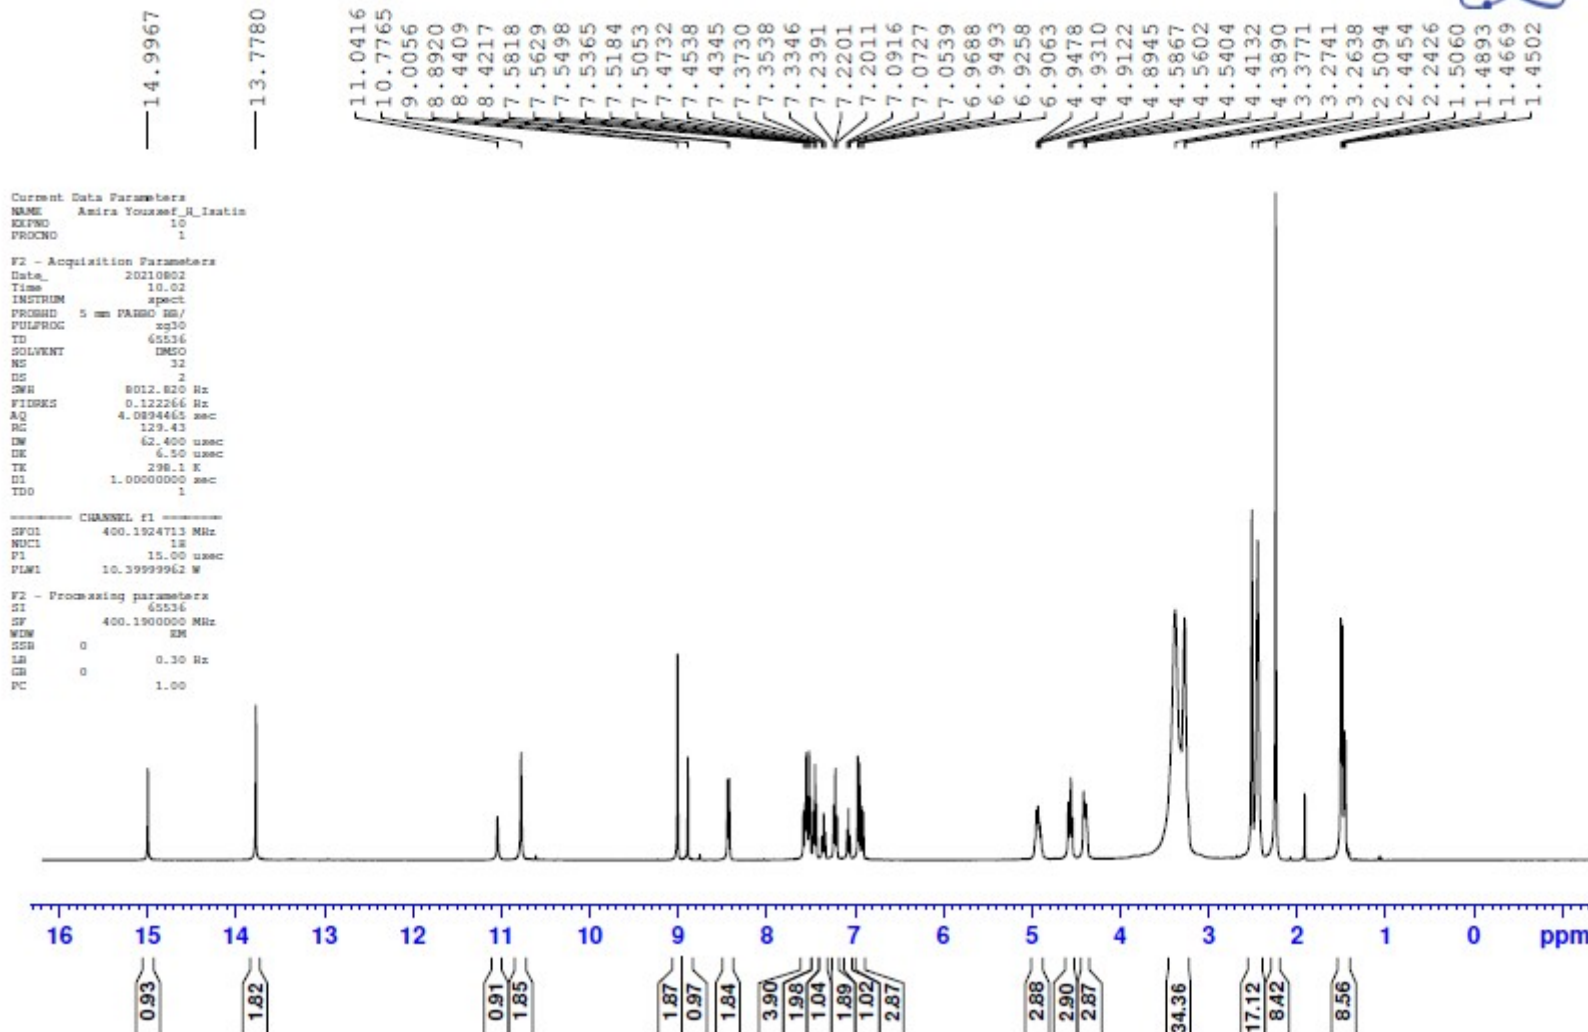

# Amira Youssef\_C\_Isatin

Microanalytical Unit - FOPCU - NMR laboratory  
 www.pharma.cu.edu.eg dir-mau.fopcu@pharma.cu.edu.eg

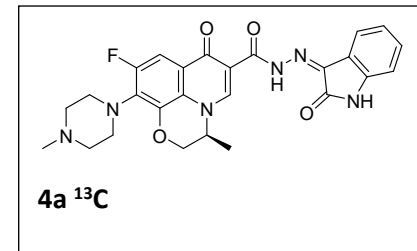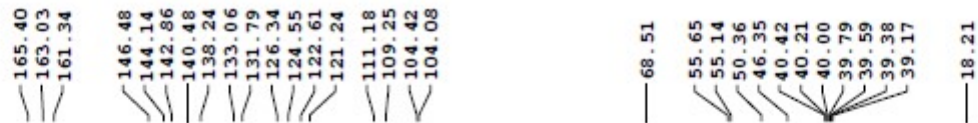

Current Data Parameters  
 NAME Amira Youssef\_C\_Isatin  
 EXPNO 10  
 PROCNO 1

### F2 - Acquisition Parameters

Date\_ 20210829  
 Time 9.11  
 INSTRUM spect  
 PROBHD 5 mm PABBO BS/  
 PULPROG zgpg30  
 TD 65536  
 SOLVENT DMSO  
 NS 200  
 DS 4  
 SWE 24038.461 Hz  
 FIDRES 0.366798 Hz  
 AQ 1.3631488 sec  
 RG 202.37  
 DW 20.800 usec  
 DE 6.50 usec  
 TE 298.1 K  
 D1 2.00000000 sec  
 D11 0.03000000 sec  
 TD0 1

----- CHANNEL f1 -----  
 SFO1 100.6379178 MHz  
 NUC1 13C  
 P1 10.00 usec  
 P1W1 45.00000000 W

----- CHANNEL f2 -----  
 SFO2 400.1916008 MHz  
 NUC2 1H  
 CPDPRG[2] waltz16

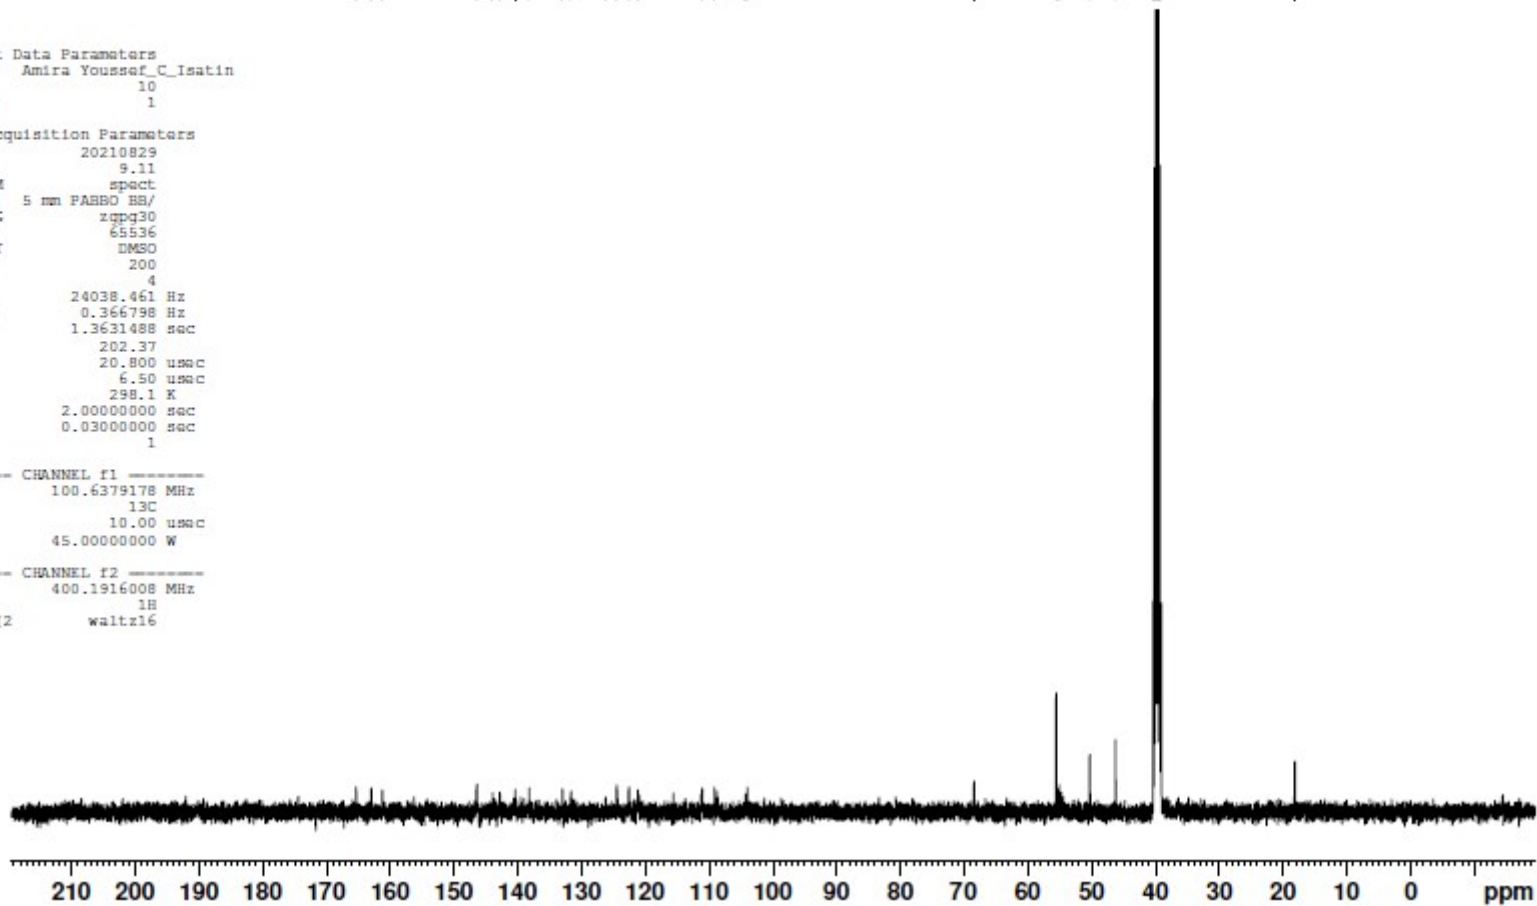

Amira Youssef\_H\_Isatin\_D2O

Microanalytical Unit - FOPCU - NMR laboratory  
 www.pharma.cu.edu.eg dir-mau.fopcu@pharma.cu.edu.eg

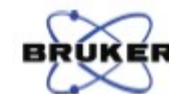

```

Current Data Parameters
NAME: Amira Youssef_H_Isatin_D2O
EXPNO: 10
PROCNO: 1

F2 - Acquisition Parameters
Date_: 20210915
Time: 11.58
INSTRUM: spect
PROBHD: 5 mm PABBO BB/
PULPROG: zgpg30
TD: 65536
SOLVENT: DMSO
NS: 32
DS: 2
SWH: 8012.820 Hz
FIDRES: 0.122264 Hz
AQ: 4.0894661 sec
RG: 32.12
DN: 62.400 usec
DE: 6.50 usec
TE: 298.2 K
D1: 1.00000000 sec
TDS: 1

----- CHANNEL f1 -----
NUC1: 13C
P1: 15.00 usec
PL1: 0.00 dB
NUC2: 1H
P2: 12.00 usec
PL2: 0.00 dB
SFO1: 101.625125 MHz
SFO2: 400.142603 MHz
=====

F2 - Processing parameters
SI: 65536
SF: 400.142603 MHz
WDW: EM
SSB: 0
LB: 0.30 Hz
GB: 0
CB: 0
PC: 1.00
    
```

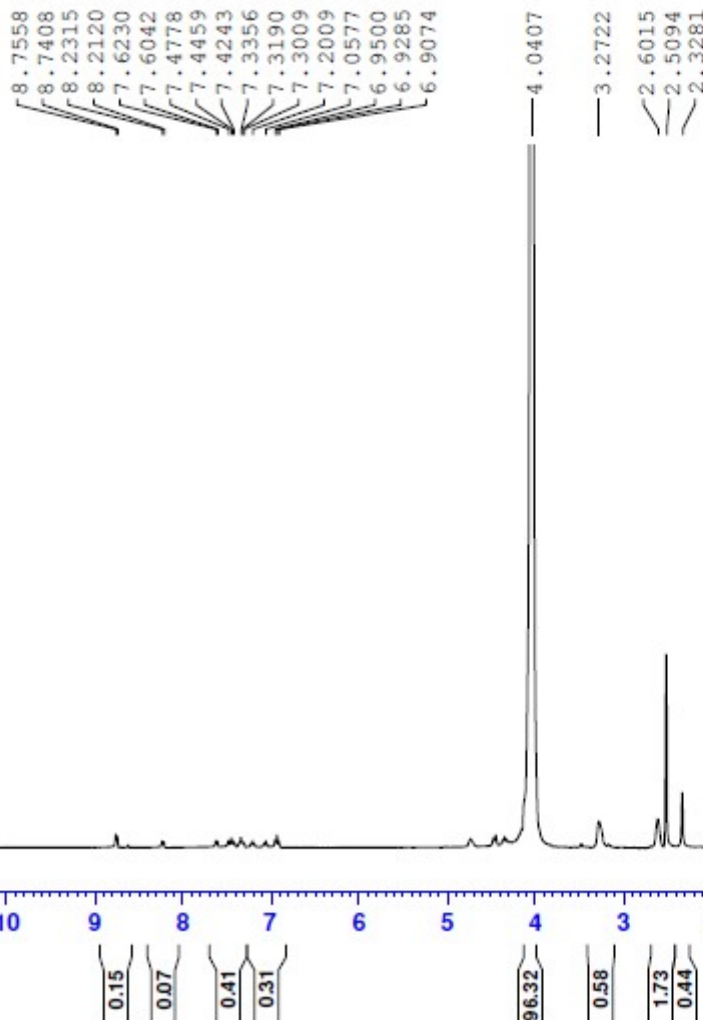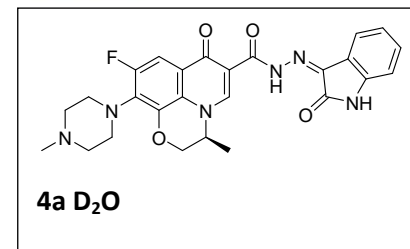

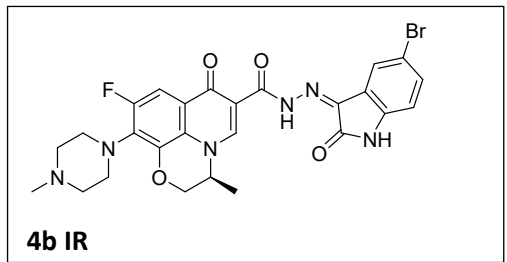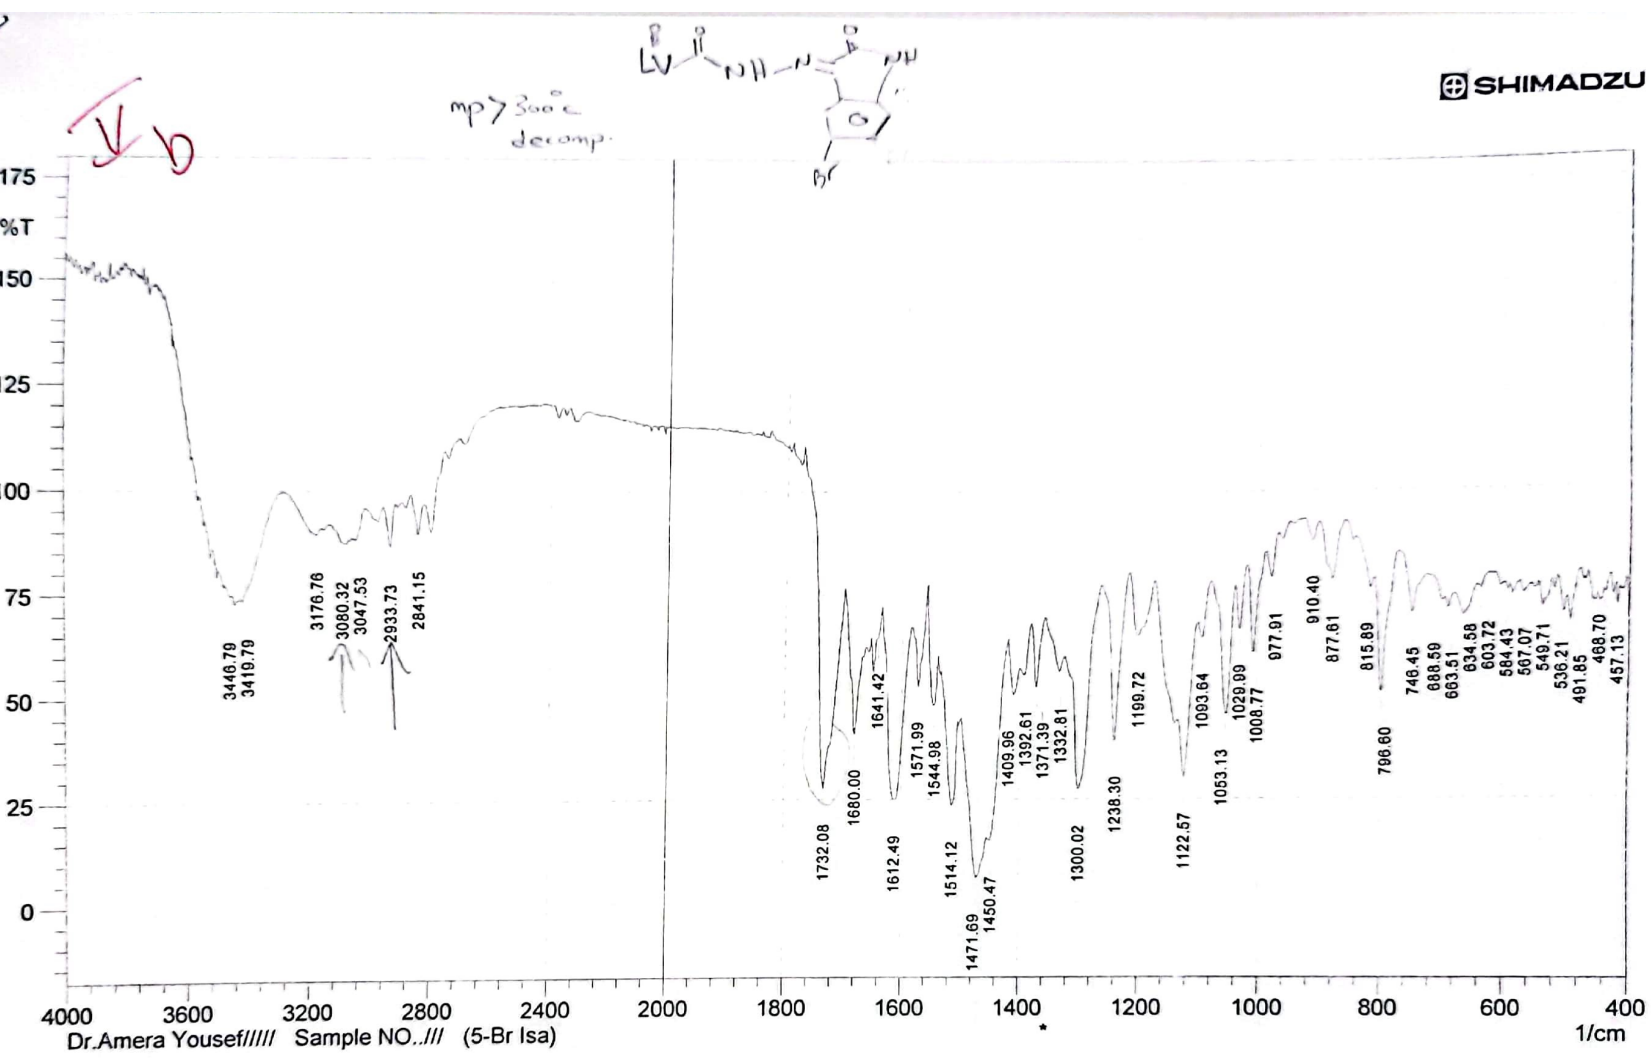

Dr.Amera Yousef///// Sample NO./// (5-Br Isa)  
 Prepared By : Dr.Ahmed A.EL-Wakeel , Ph.D.

Date/Time; 4/30/2010 2:39:10 AM  
 No. of Scans; 10  
 Resolution; 4 [1/cm]

Amira Youssef\_H\_5-Br-Isa

Microanalytical Unit - FOPCU - NMR laboratory  
 www.pharma.cu.edu.eg dir-mau.fopcu@pharma.cu.edu.eg

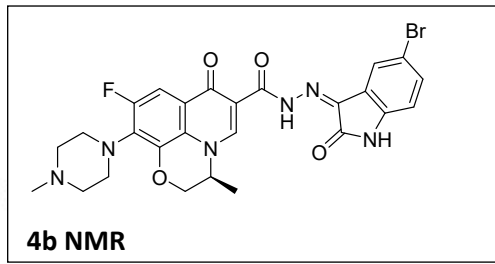

15.0053  
 13.8378  
 11.1592  
 10.9030  
 9.0168  
 8.9005  
 8.6407  
 7.6280  
 7.6184  
 7.5961  
 7.5200  
 7.4927  
 6.9077  
 6.8862  
 6.8637  
 4.9320  
 4.5885  
 4.5622  
 4.5448  
 4.4135  
 4.3913  
 3.3507  
 3.2706  
 2.5098  
 2.4406  
 2.2399  
 1.5032  
 1.4883  
 1.4717  
 1.4554

```

Current Data Parameters
NAME      Amira Youssef_H_5-Br-Isa
EXPNO    10
PROCNO   1

F2 - Acquisition Parameters
Data_    20210802
Time     10.09
INSTRUM  spect
PROBHD   5 mm PABBO BB/
PULPROG  zg30
TD       65536
SOLVENT  DMSO
NS       32
DS       2
SWH      8012.800 Hz
FIDRES   0.122264 Hz
AQ       4.0894445 sec
RG       144.04
DM       62.400 usec
DE       4.50 usec
TE       298.0 K
D1       1.00000000 sec
TD0      1

===== CHANNEL f1 =====
SFO1     400.1924713 MHz
NUC1     1H
P1       15.00 usec
PLW1     10.39999962 W

F2 - Processing parameters
SI       65536
SF       400.1900000 MHz
WDW      EM
SSB      0
GB       0
PC       1.00
    
```

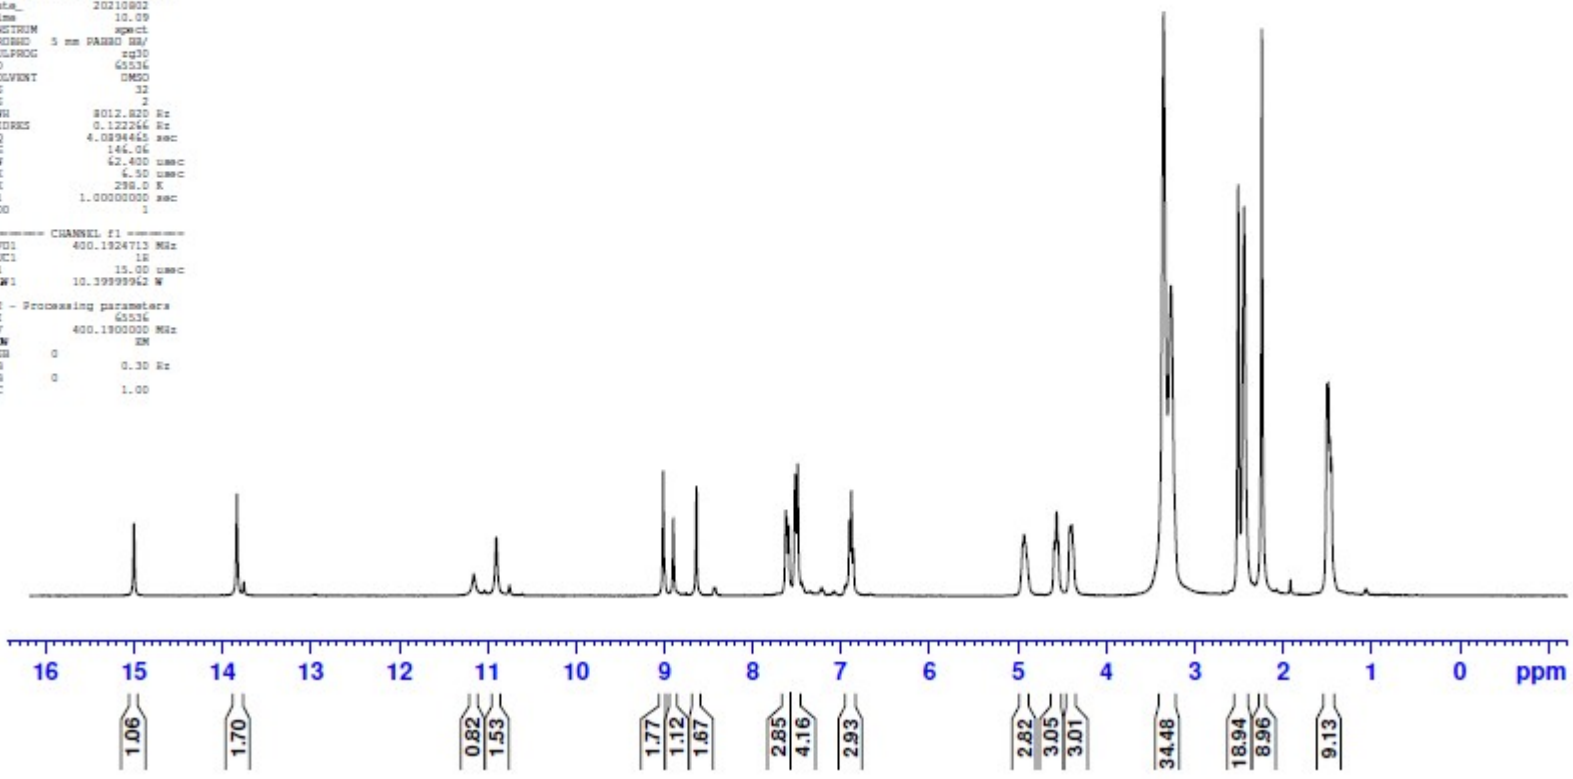

Amira Youssef\_H\_5-Br-Isa\_D2O

Microanalytical Unit - FOPCU - NMR laboratory  
www.pharma.cu.edu.eg dir-mau.fopcu@pharma.cu.edu.eg

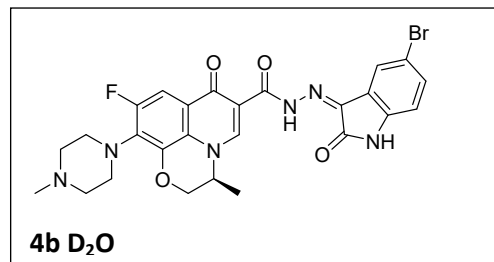

```

Current data parameters
NAME      Amira Youssef_H_5-Br-Isa_D2O
EXPNO    10
PROCNO   1

F2 - Acquisition parameters
DATE_    20210915
TIME     12.17
INSTRUM  spect
PROBHD   5 mm HAWAC HNP/
PULPROG  zgpg30
TD       65536
SOLVENT  DMSO
AQ       32
RG       2
SM      8012.820 Hz
FIDRES   0.122266 Hz
AQ       4.089442e sec
RG       56.39
DS       62.400 umax
SFO      4.00
TE       300.0 K
D1       1.00000000 sec
TAD      1

----- Channel f1 -----
NUC1     13C
P1       15.00 umax
PCPD     15.3986962 W

F2 - Processing parameters
SI       65536
SF       400.1480000 MHz
RG       64
WDW      EM
SSB      0
LB       0.30 Hz
GB       0
PC       1.00
    
```

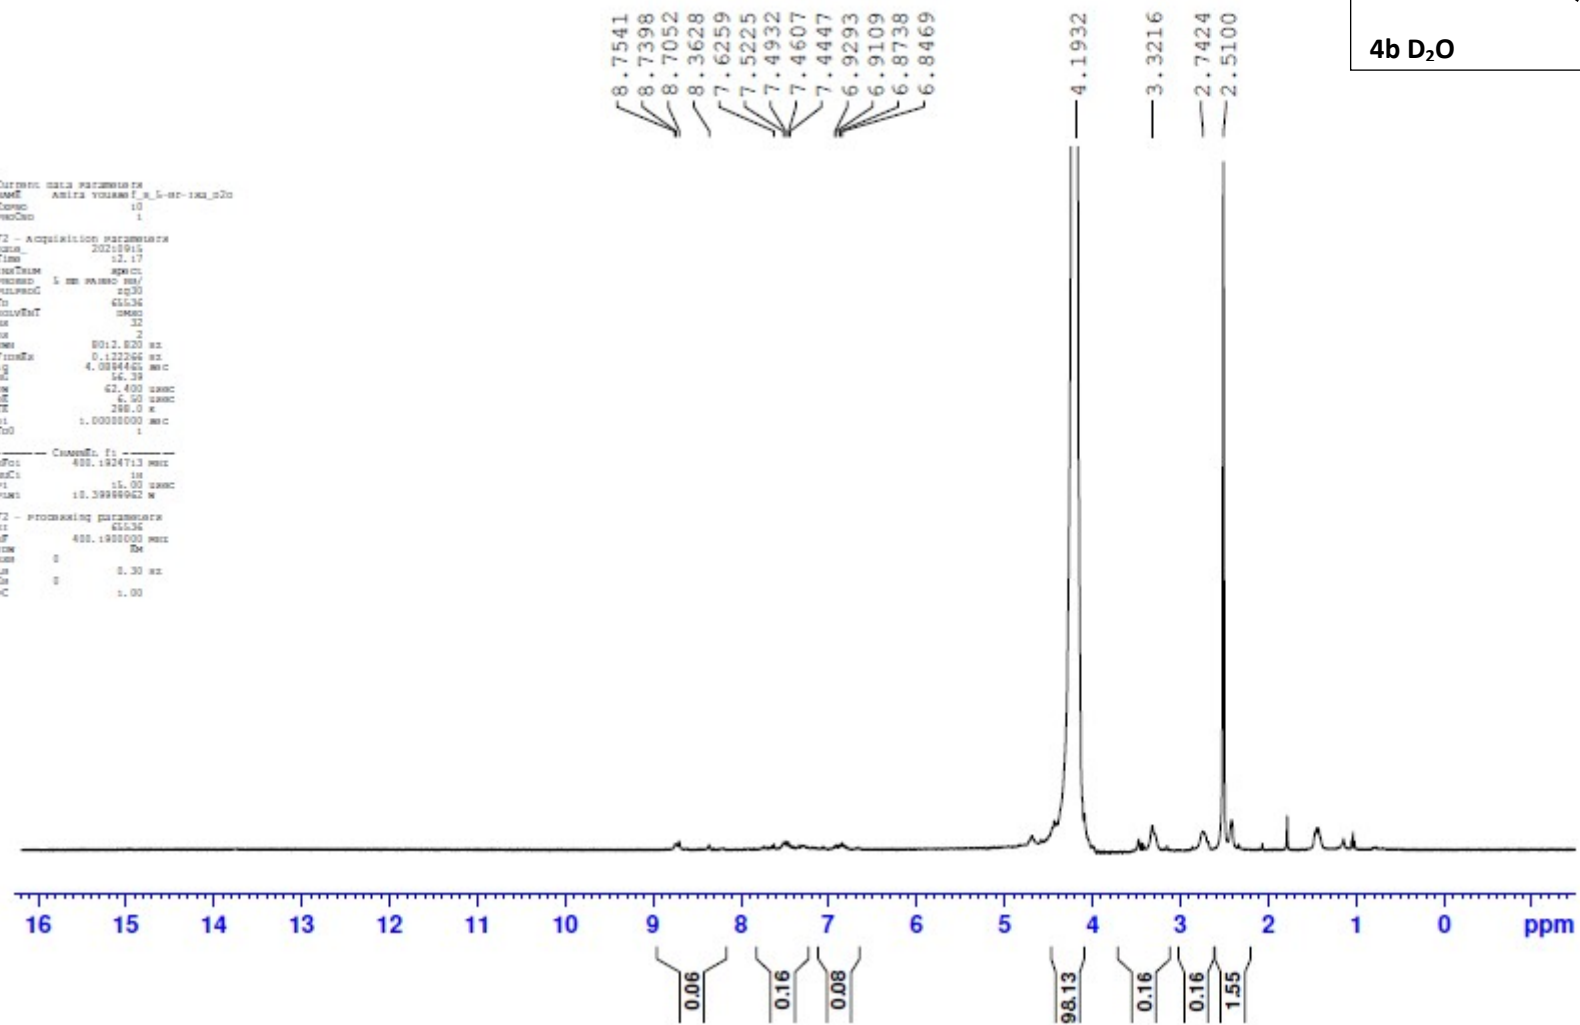



Amira Youssef\_C\_5-Br-Isa

Microanalytical Unit - FOPCU - NMR laboratory  
www.pharma.cu.edu.eg dir-mau.fopcu@pharma.cu.edu.eg

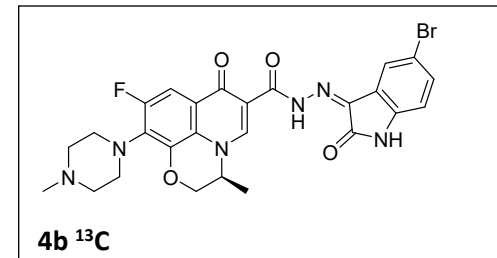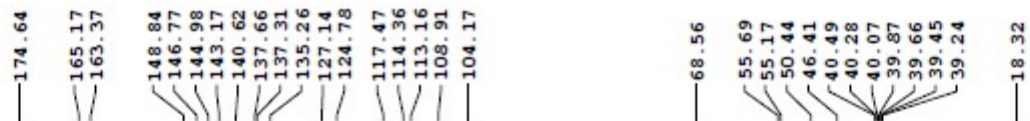

Current Data Parameters  
NAME Amira Youssef\_C\_5-Br-Is  
EXPNO 10  
PROCNO 1

F2 - Acquisition Parameters

Date\_ 20210829  
Time 11.29  
INSTRUM spect  
PROBHD 5 mm PABBO BS/  
PULPROG zgpg30  
TD 65536  
SOLVENT DMSO  
NS 1500  
DS 4  
SWE 24038.461 Hz  
FIDRES 0.366798 Hz  
AQ 1.3631488 sec  
RG 202.37  
DW 20.800 usec  
DE 6.50 usec  
TE 298.1 K  
D1 2.00000000 sec  
D11 0.03000000 sec  
TD0 1

----- CHANNEL f1 -----

SFO1 100.6379178 MHz  
NUC1 13C  
P1 10.00 usec  
PIW1 45.00000000 W

----- CHANNEL f2 -----

SFO2 400.1916008 MHz  
NUC2 1H  
CPDPRG[2] waltz16

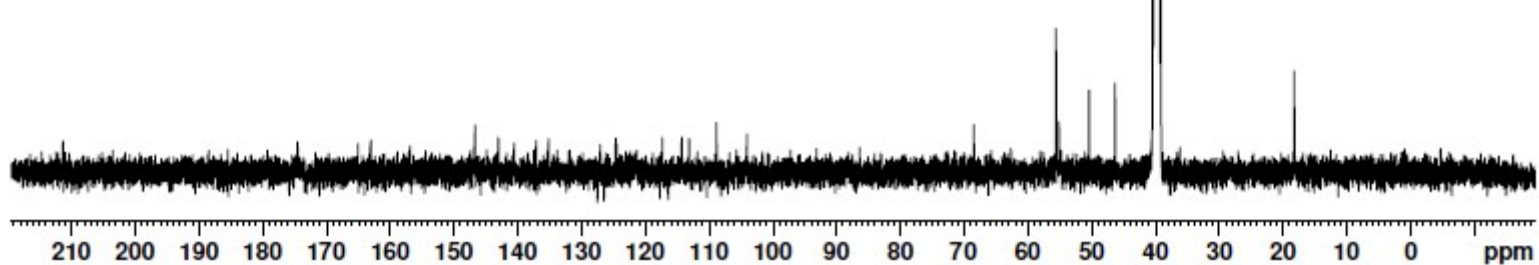



Is

chloroisatin

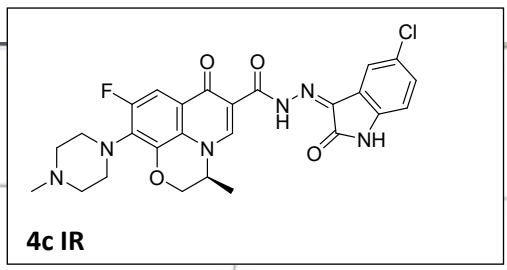

SHIMADZU

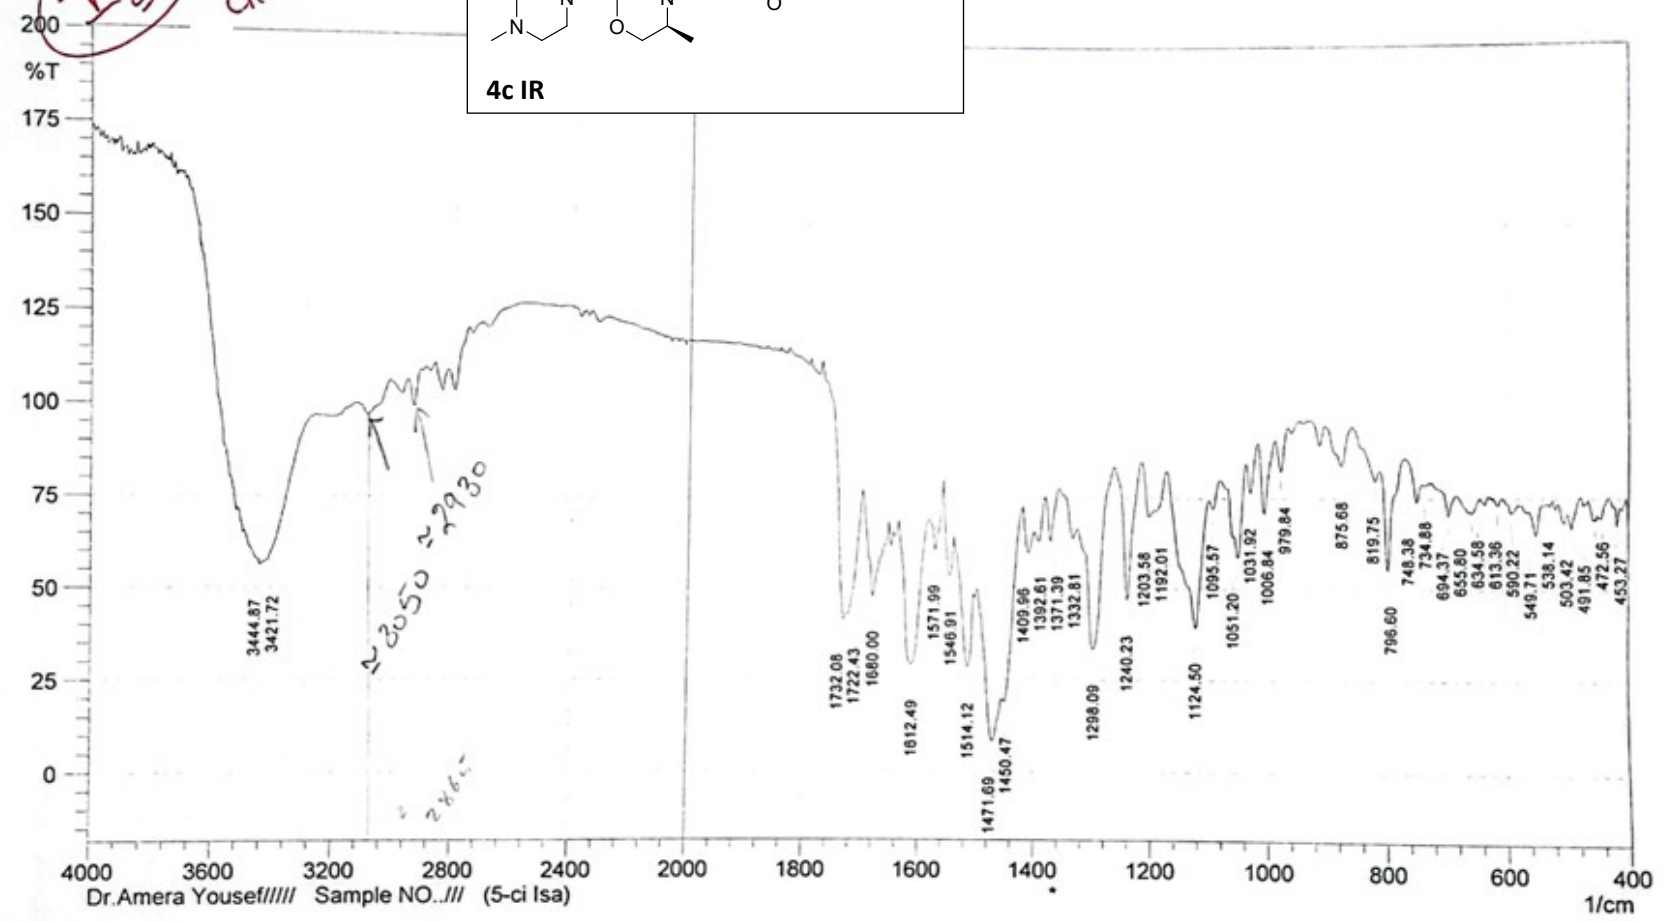

Comment;  
 Dr.Amera Yousef///// Sample NO./// (5-ci Isa)  
 \*\*Prepared By : Dr.Ahmed A.EL-Wakeel , Ph.D.

Date/Time; 4/30/2010 1:54:48 AM  
 No. of Scans; 10  
 Resolution; 4 [1/cm]  
 Apodization; Happ-Genzel  
 User; Heinrich

Amira Youssef\_H\_5-Cl-Isa

Microanalytical Unit - FOPCU - NMR laboratory  
www.pharma.cu.edu.eg dir-mau.fopcu@pharma.cu.edu.eg

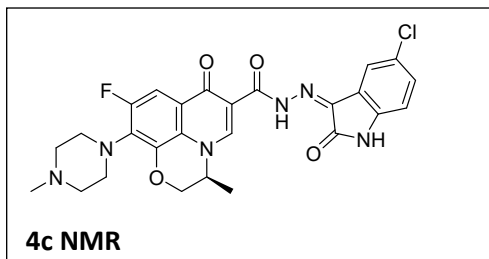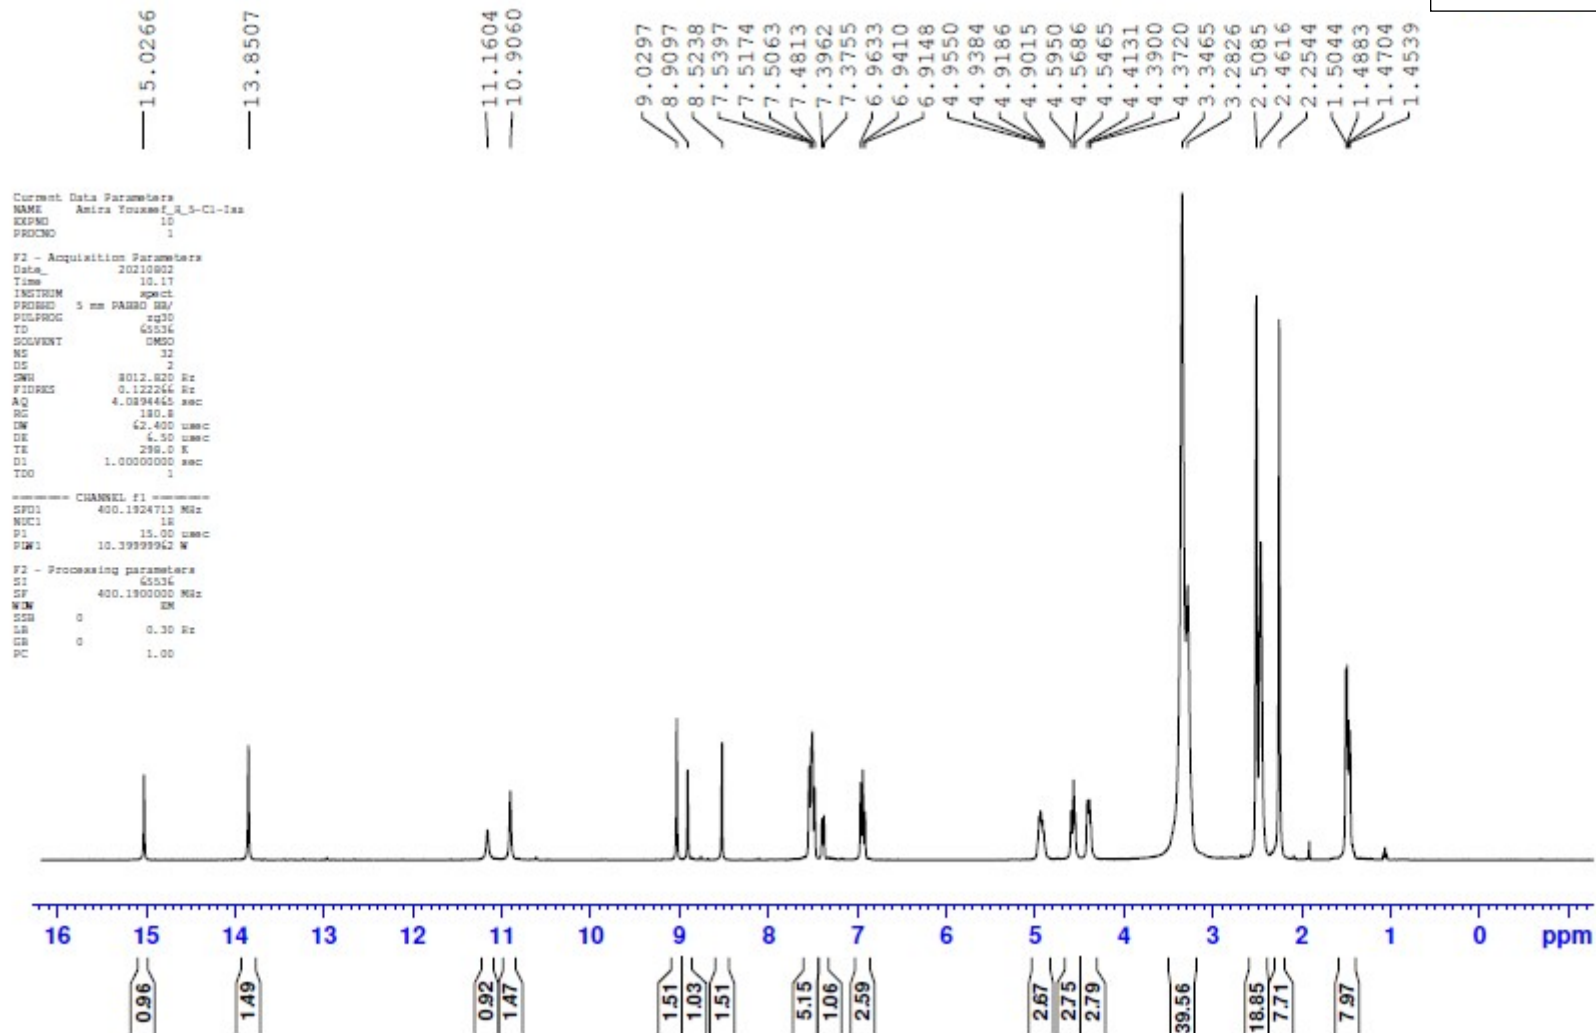

Amira Youssef\_H\_5-Cl-Isa\_D2O

Microanalytical Unit - FOPCU - NMR laboratory  
www.pharma.cu.edu.eg dir-mau.fopcu@pharma.cu.edu.eg

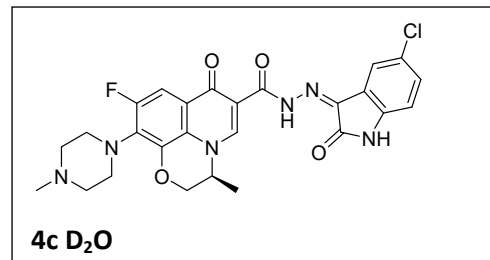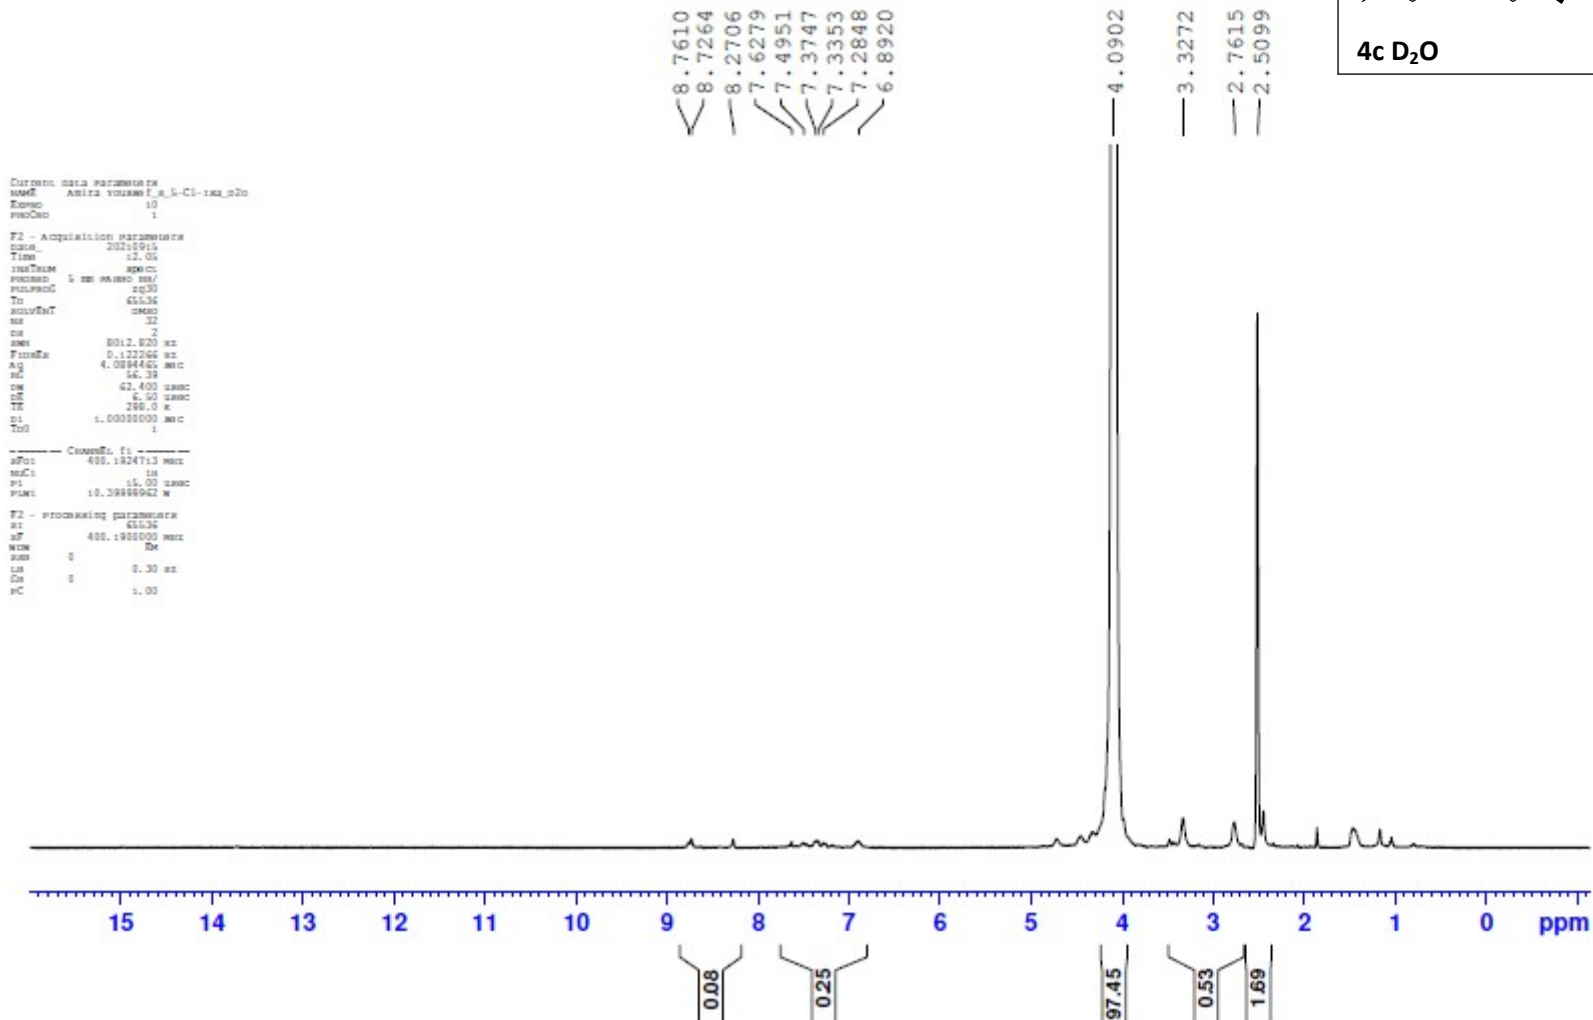

```

Current data parameters
NAME Amira Youssef_H_5-Cl-Isa_D2O
EXPNO 10
PROCNO 1

F2 - Acquisition parameters
Date_ 20130915
Time 12.05
INSTRUM spect
PROBHD 5 mm HANCE HNP
PULPROG zg30
TD 65536
SOLVENT DMSO
NS 32
DS 2
SWH 8012.820 Hz
FREQHz 400.122266 Hz
AQ 4.0884425 sec
RG 65.38
DS 62.400 umax
DE 6.50 umax
TE 298.0 K
SI 1.0000000 sec
TD0 1

===== Channel f1 =====
NUC1 13C
P1 15.00 umax
PL1 0.39999962 W

F2 - Processing parameters
SI 65536
SF 400.122266 MHz
WDW EM
SSB 0
GB 0.30 Hz
CB 0
PC 1.00
    
```

Amira Youssef\_C\_5-Cl-Isa

Microanalytical Unit - FOPCU - NMR laboratory  
www.pharma.cu.edu.eg dir-mau.fopcu@pharma.cu.edu.eg

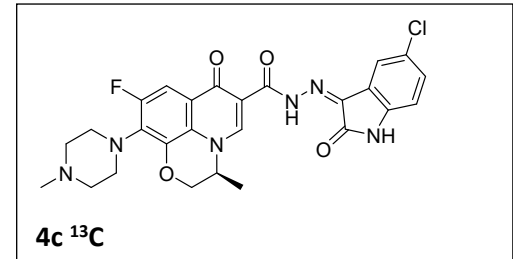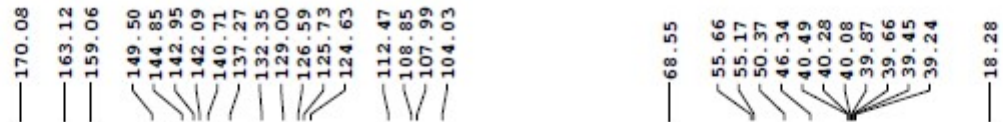

Current Data Parameters  
NAME Amira Youssef\_C\_5-Cl-Is  
EXPNO 10  
PROCNO 1

F2 - Acquisition Parameters

Date\_ 20210829  
Time 9.58  
INSTRUM spect  
PROBHD 5 mm PABBO ES/  
PULPROG zgpg30  
TD 65536  
SOLVENT DMSO  
NS 200  
DS 4  
SWE 24038.461 Hz  
FIDRES 0.366798 Hz  
AQ 1.3631488 sec  
RG 202.37  
DW 20.800 usac  
DE 6.50 usac  
TK 298.0 K  
D1 2.0000000 sec  
D11 0.0300000 sec  
TDO 1

----- CHANNEL f1 -----  
SFO1 100.6379178 MHz  
NUC1 13C  
P1 10.00 usac  
PIW1 45.00000000 W

----- CHANNEL f2 -----  
SFO2 400.1916008 MHz  
NUC2 1H  
CPDPRG[2] waltz16

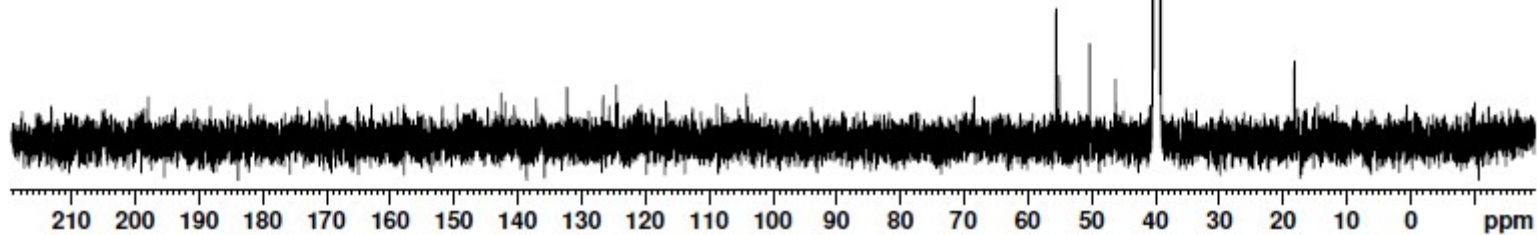

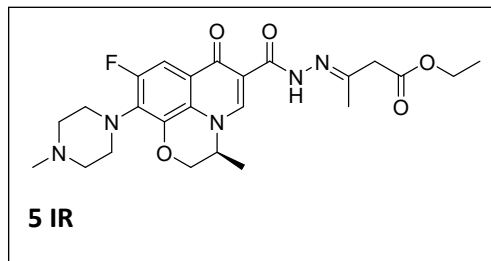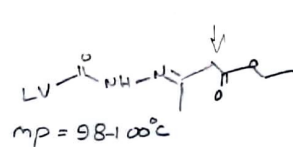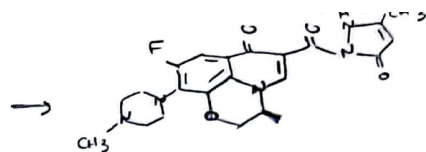

mp = 178-180°C

SHIMADZU

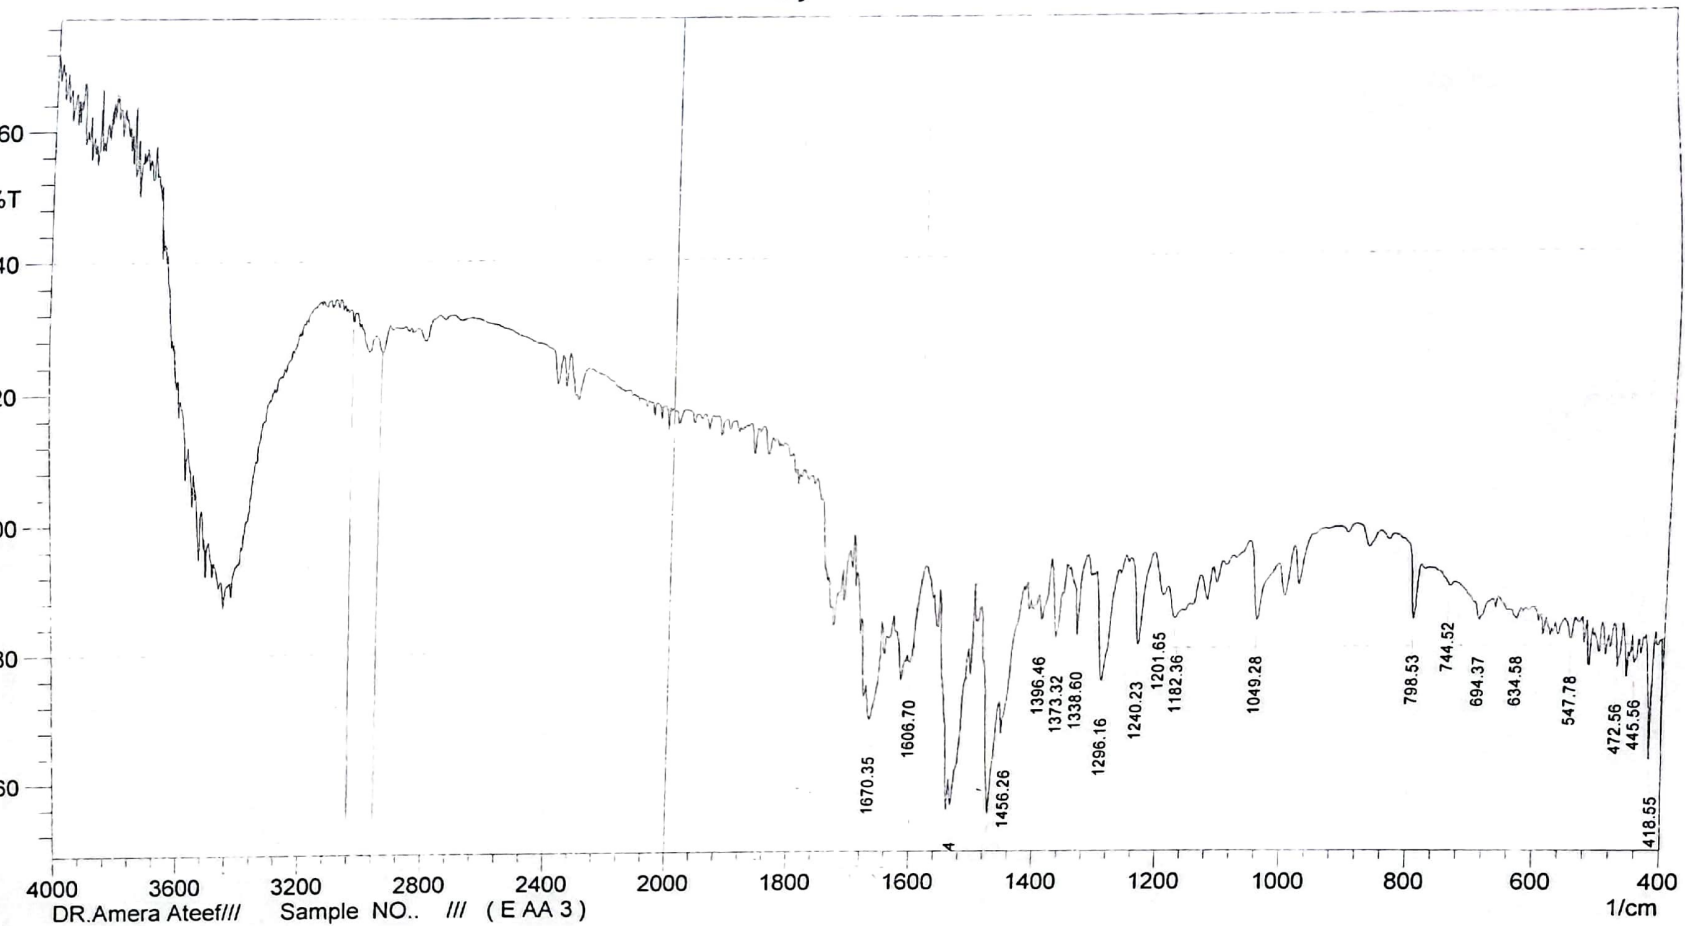

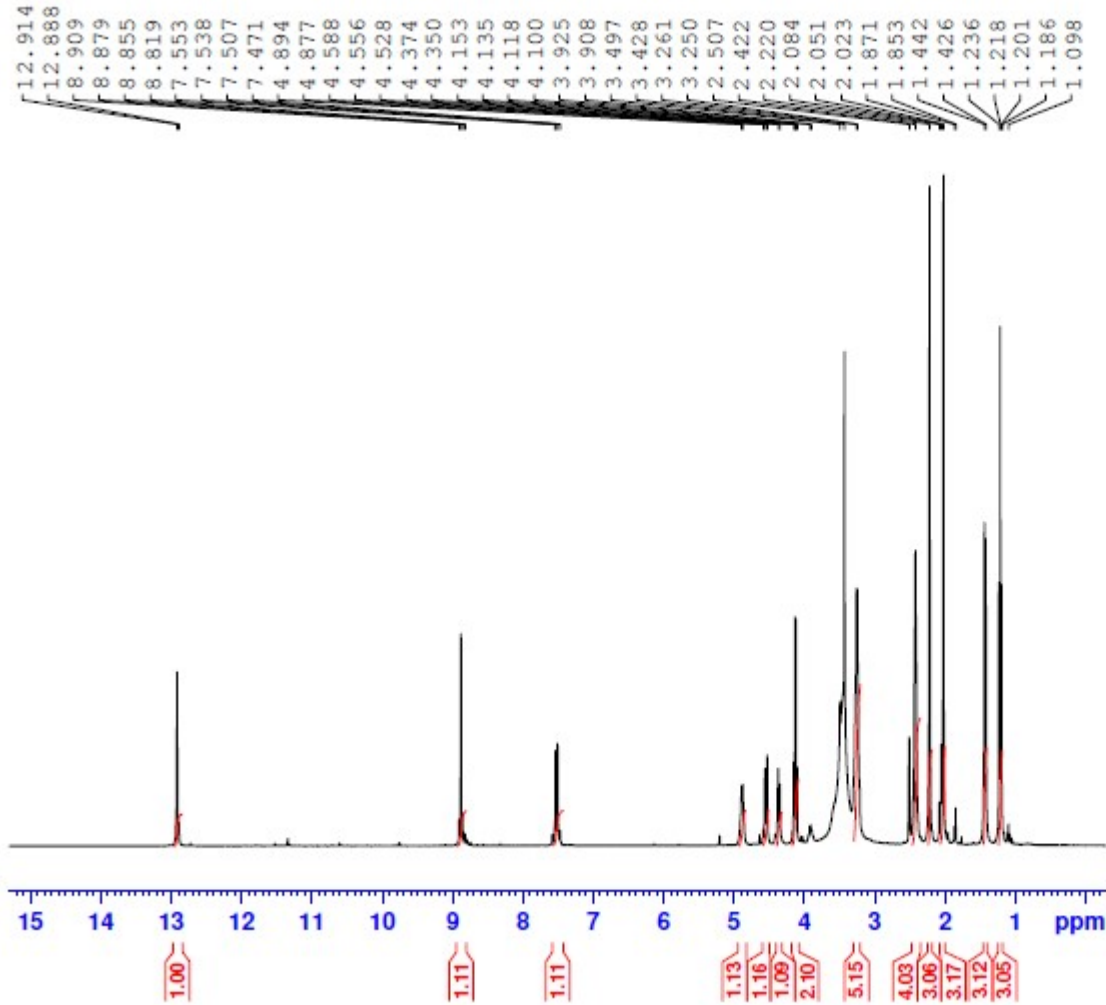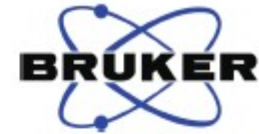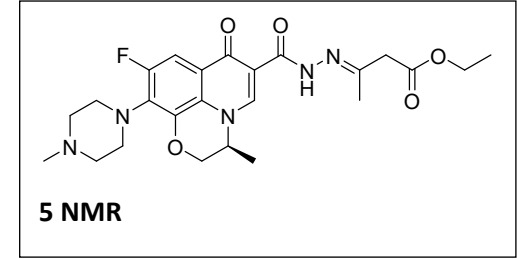

Current Data Parameters  
 NAME amira-youssef-EAA  
 EXPNO 1  
 PROCNO 1

F2 - Acquisition Parameters  
 Date\_ 20211125  
 Time 14.51  
 INSTRUM spect  
 PROBHD 5 mm FAPBO BB/  
 PULPROG zg30  
 TD 65536  
 SOLVENT DMSO  
 NS 26  
 DS 2  
 SWH 8012.820 Hz  
 FIDRES 0.122266 Hz  
 AQ 4.0894465 sec  
 RG 205.37  
 DW 62.400 usec  
 DE 6.50 usec  
 TE 300.0 K  
 D1 1.00000000 sec  
 TDO 1

==== CHANNEL f1 =====  
 SFO1 400.1524711 MHz  
 NUC1 1H  
 P1 12.00 usec  
 PLW1 18.00000000 W

F2 - Processing parameters  
 SI 65536  
 SF 400.1500000 MHz  
 WDW EM  
 SSB 0  
 LB 0.30 Hz  
 GB 0  
 PC 1.00

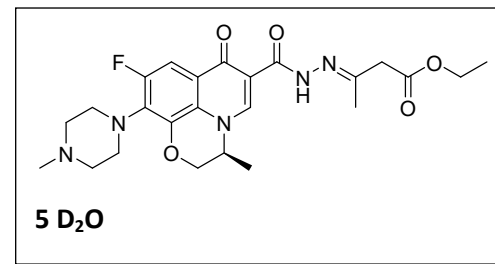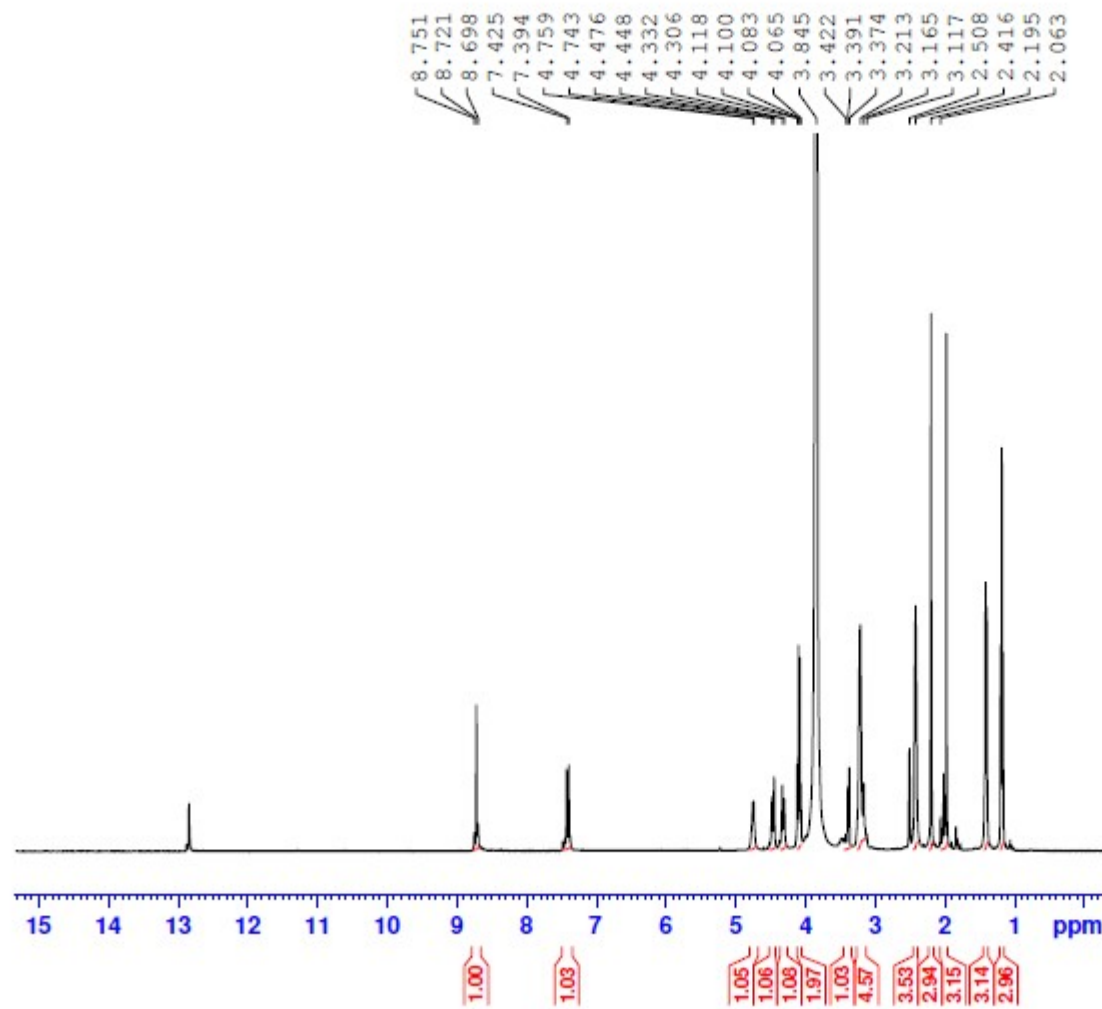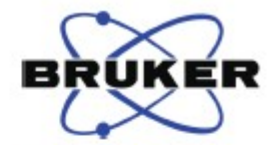

Current Data Parameters  
 NAME anira-youssef-EAA-d2o  
 EXPNO 1  
 PROCNO 1

F2 - Acquisition Parameters  
 Date\_ 20211212  
 Time 15.56  
 INSTRUM spect  
 PROCNO 5 mm PABBO BB/  
 PULPROG zg30  
 TD 65536  
 SOLVENT DMSO  
 NS 16  
 DS 2  
 SWH 8012.820 Hz  
 FIDRES 0.122266 Hz  
 AQ 4.0894465 sec  
 RG 117.48  
 DW 62.400 usec  
 DE 6.50 usec  
 TE 300.0 K  
 D1 1.00000000 sec  
 TD0 1

----- CHANNEL f1 -----  
 SF01 400.1524711 MHz  
 NUC1 1H  
 P1 12.00 usec  
 PLW1 18.00000000 W

F2 - Processing parameters  
 SI 65536  
 SF 400.1500000 MHz  
 WDW EM  
 SSB 0  
 LB 0.30 Hz  
 GB 0  
 PC 1.00



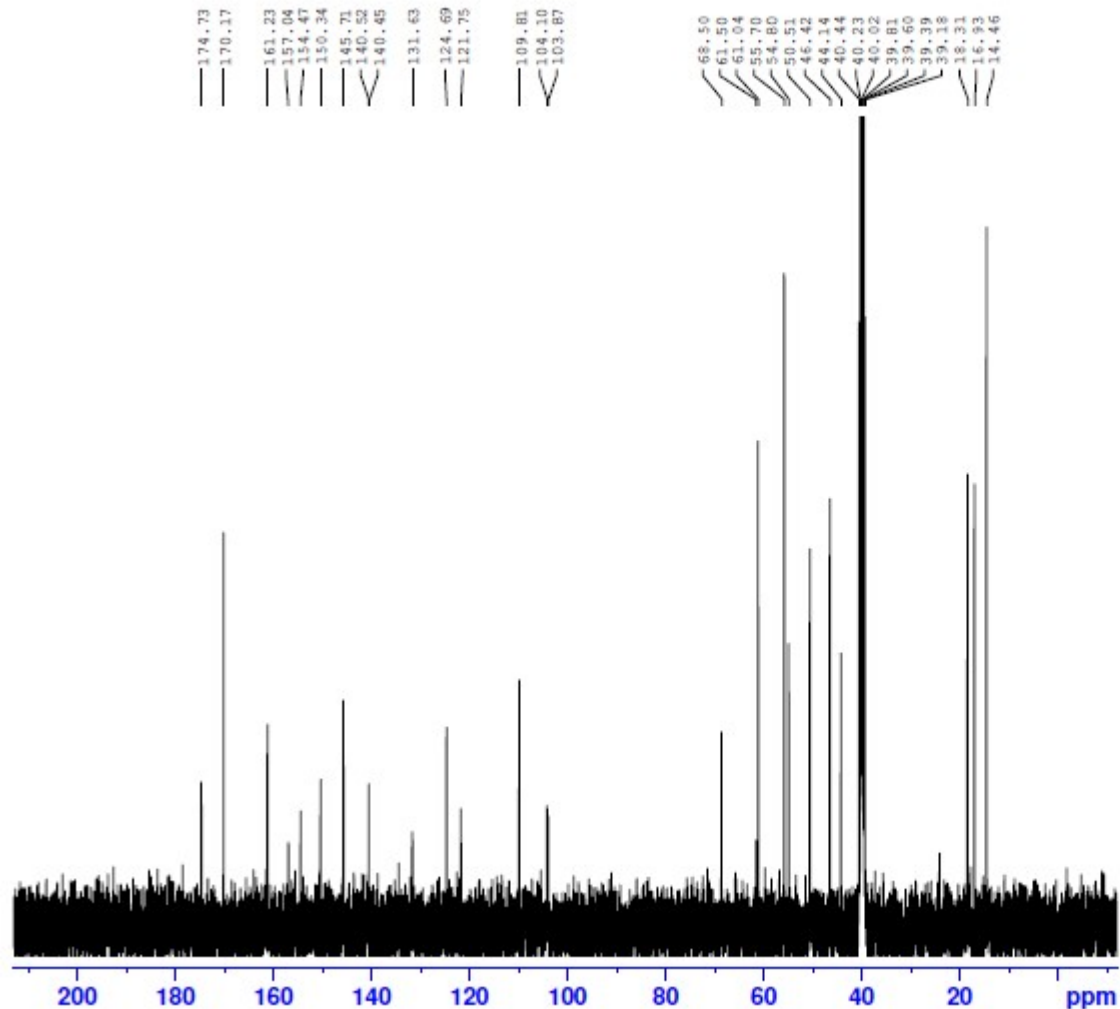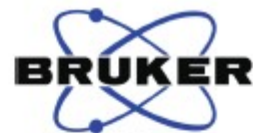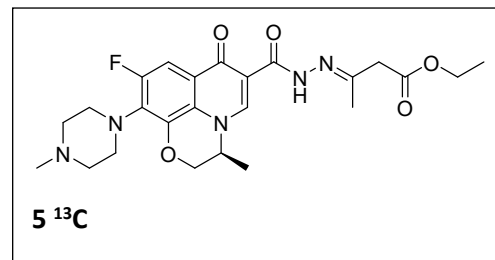

Current Data Parameters  
NAME amira-youssef-EAA  
EXPNO 2  
PROCNO 1

F2 - Acquisition Parameters  
Date\_ 20211212  
Time 13.57  
INSTRUM spect  
PROBHD 5 mm PABBO BB/  
PULPROG zgpg30  
TD 65536  
SOLVENT DMSO  
NS 643  
DS 4  
SWH 24038.461 Hz  
FIDRES 0.366798 Hz  
AQ 1.3631488 sec  
RG 205.37  
DW 20.800 usec  
DE 6.50 usec  
TE 300.0 K  
D1 2.0000000 sec  
D11 0.0300000 sec  
TD0 1

===== CHANNEL f1 =====  
SFO1 100.6278588 MHz  
NUC1 13C  
P1 10.00 usec  
PLW1 47.00000000 W

===== CHANNEL f2 =====  
SFO2 400.1516006 MHz  
NUC2 1H  
CPDPRG[2] waltz16  
PCPD2 90.00 usec  
PLW2 18.00000000 W  
PLW12 0.34722000 W  
PLW13 0.28125000 W

F2 - Processing parameters  
SI 32768  
SF 100.6177975 MHz  
WDW EM  
SSB 0  
LB 1.00 Hz  
GB 0  
PC 1.40

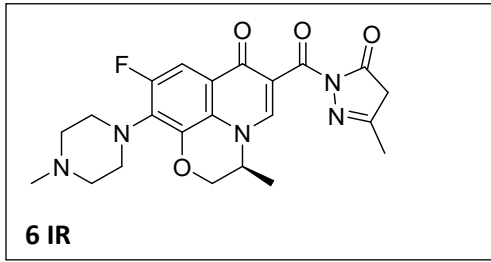

SHIMADZU

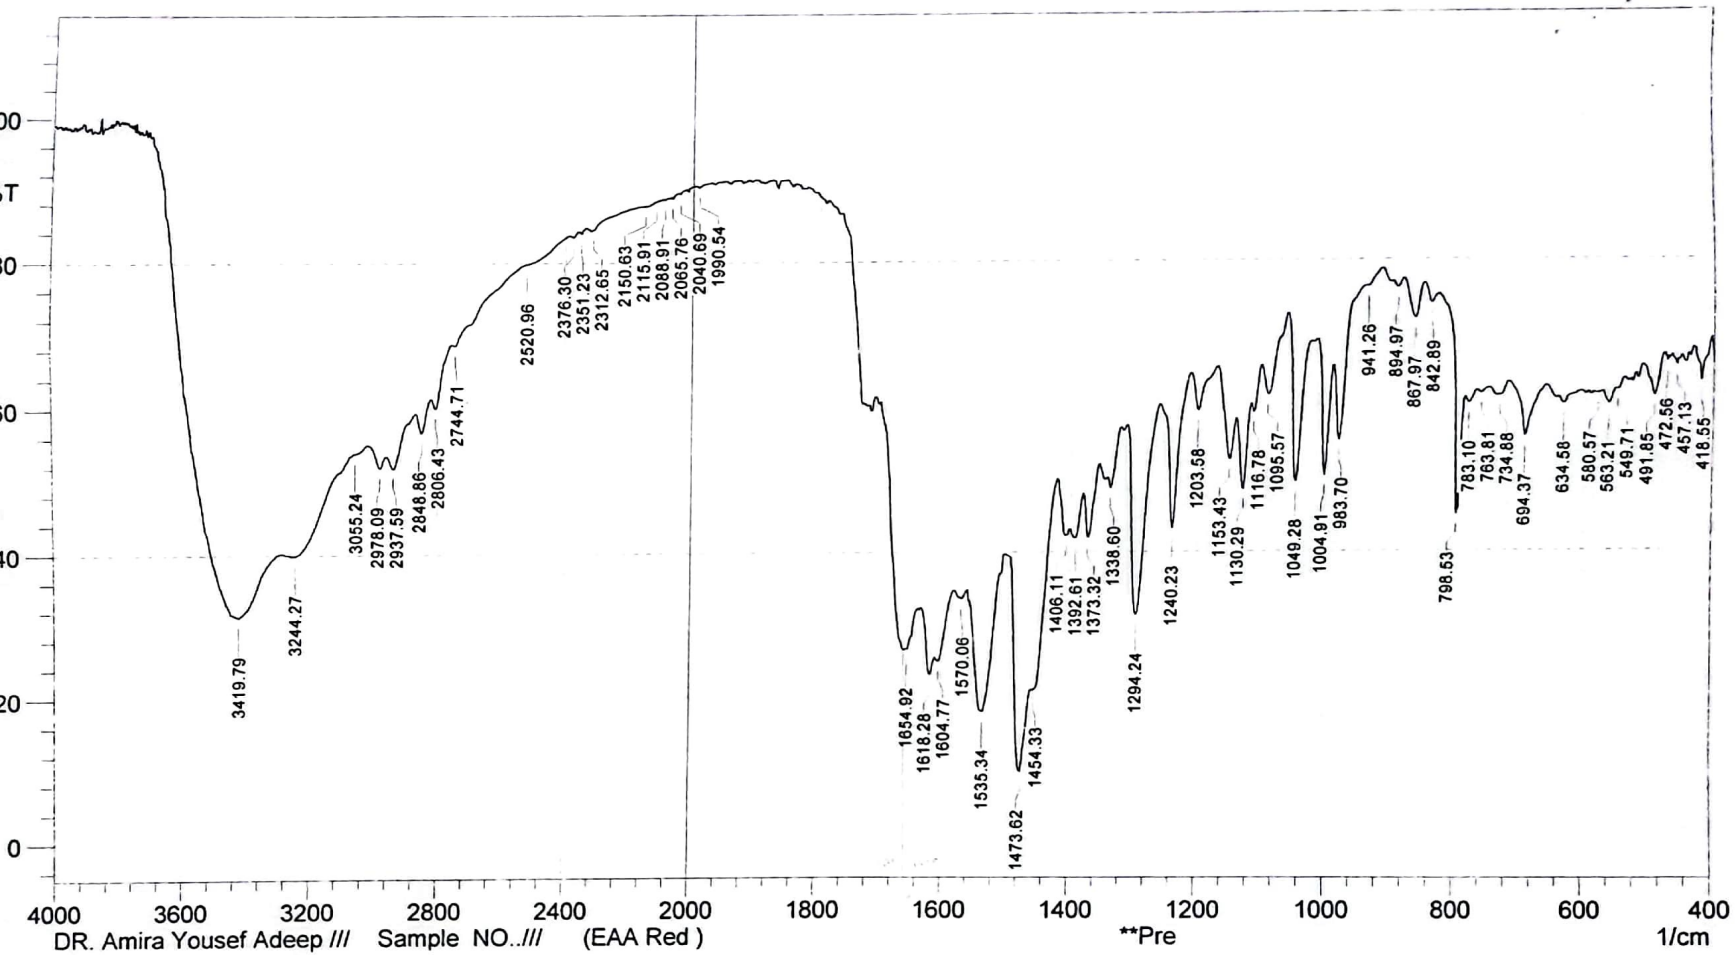

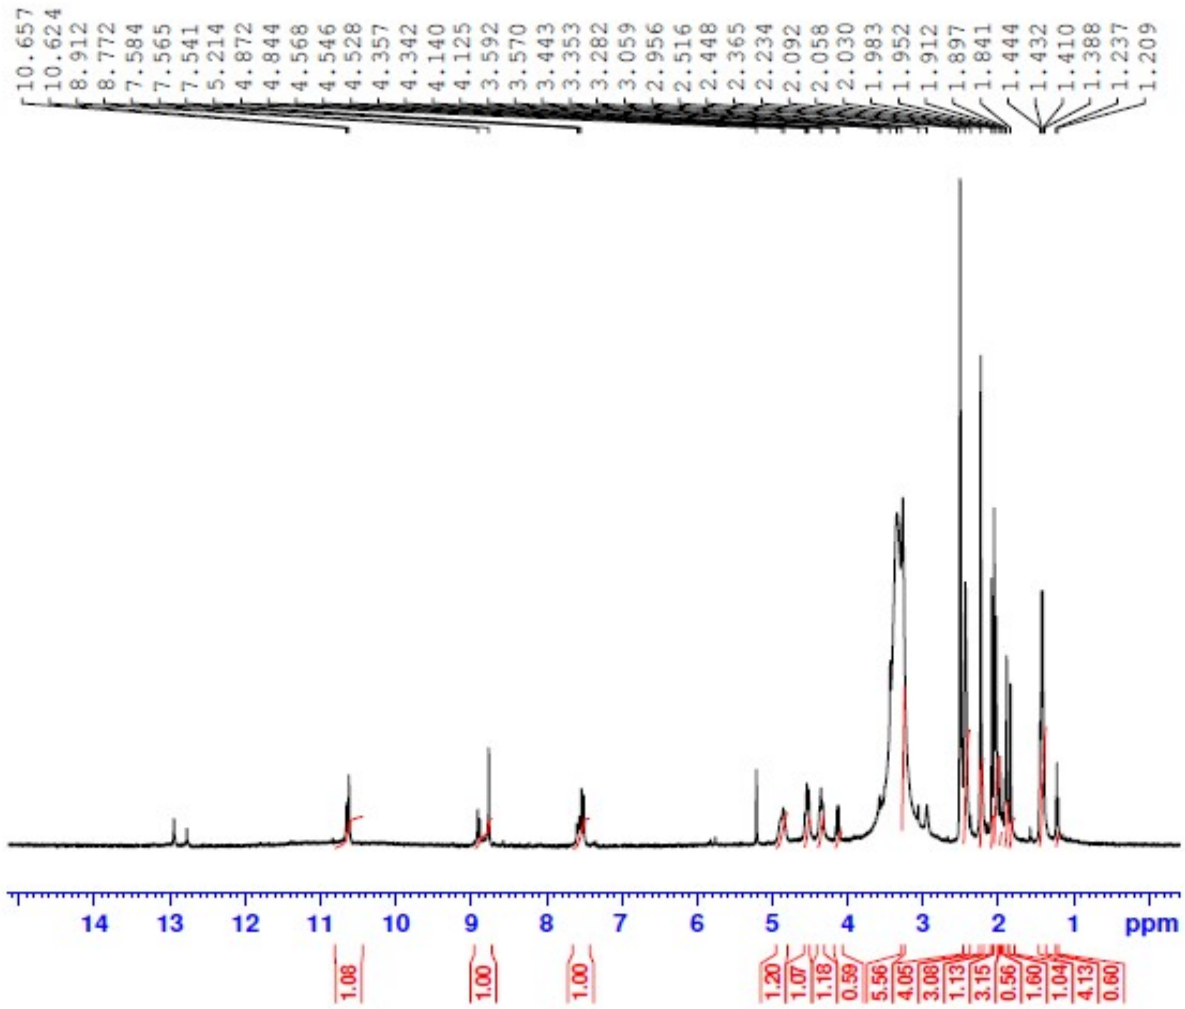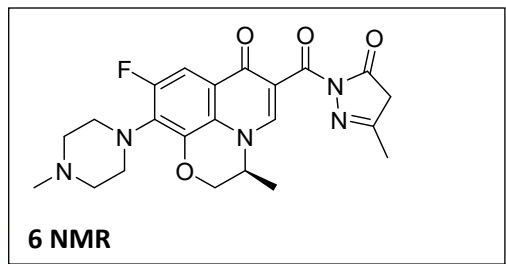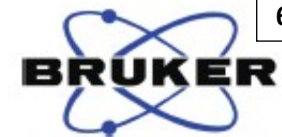

```

Current Data Parameters
NAME      amira-youssef-EAA-red
EXPNO     1
PROCNO    1

F2 - Acquisition Parameters
Date_     20220119
Time      16.29
INSTRUM   spect
PROBHD    5 mm PABBO BB/
PULPROG   zg30
TD         65536
SOLVENT   DMSO
NS         32
DS         2
SWH        8012.820 Hz
FIDRES     0.122266 Hz
AQ         4.0894465 sec
RG         31.47
DW         62.400 usec
DE         6.50 usec
TE         300.0 K
D1         1.00000000 sec
TD0        1

----- CHANNEL f1 -----
SFO1      400.1524711 MHz
NUC1       1H
P1         12.00 usec
PLW1      18.00000000 W

F2 - Processing parameters
SI         65536
SF         400.1500000 MHz
WDW        EM
SSB        0
LB         0.30 Hz
GB         0
PC         1.00
  
```

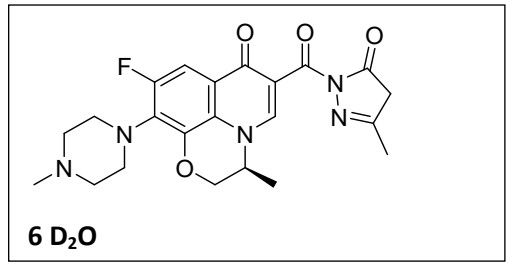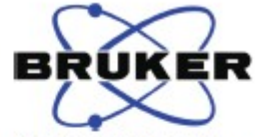

Current Data Parameters  
 NAME amira-youssef-EAA-red-d2o  
 EXPNO 1  
 PROCNO 1

F2 - Acquisition Parameters  
 Date\_ 20220209  
 Time 10.37  
 INSTRUM spect  
 PROBHD 5 mm PABBO BB/  
 PULPROG zg30  
 TD 65536  
 SOLVENT DMSO  
 NS 88  
 DS 2  
 SWH 8012.820 Hz  
 FIDRES 0.122266 Hz  
 AQ 4.0894465 sec  
 RG 205.37  
 DW 62.400 usec  
 DE 6.50 usec  
 TE 300.0 K  
 D1 1.00000000 sec  
 TDO 1

CHANNEL f1

SFO1 400.1524711 MHz  
 NUCL1 1H  
 P1 12.00 usec  
 PLW1 18.00000000 W

F2 - Processing parameters  
 SI 65536  
 SF 400.1500000 MHz  
 WDW EM  
 SSB 0  
 LB 0.30 Hz  
 GB 0  
 PC 1.00

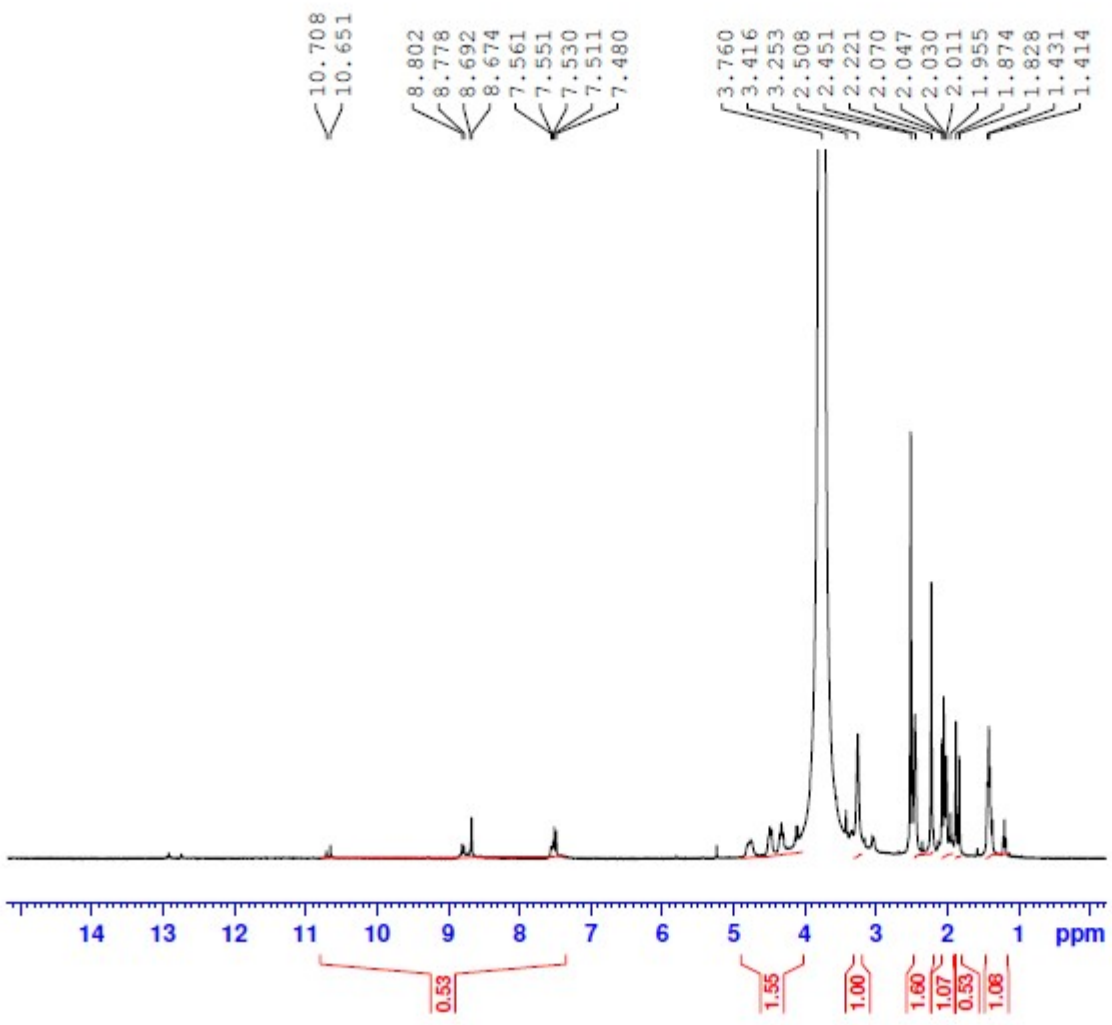

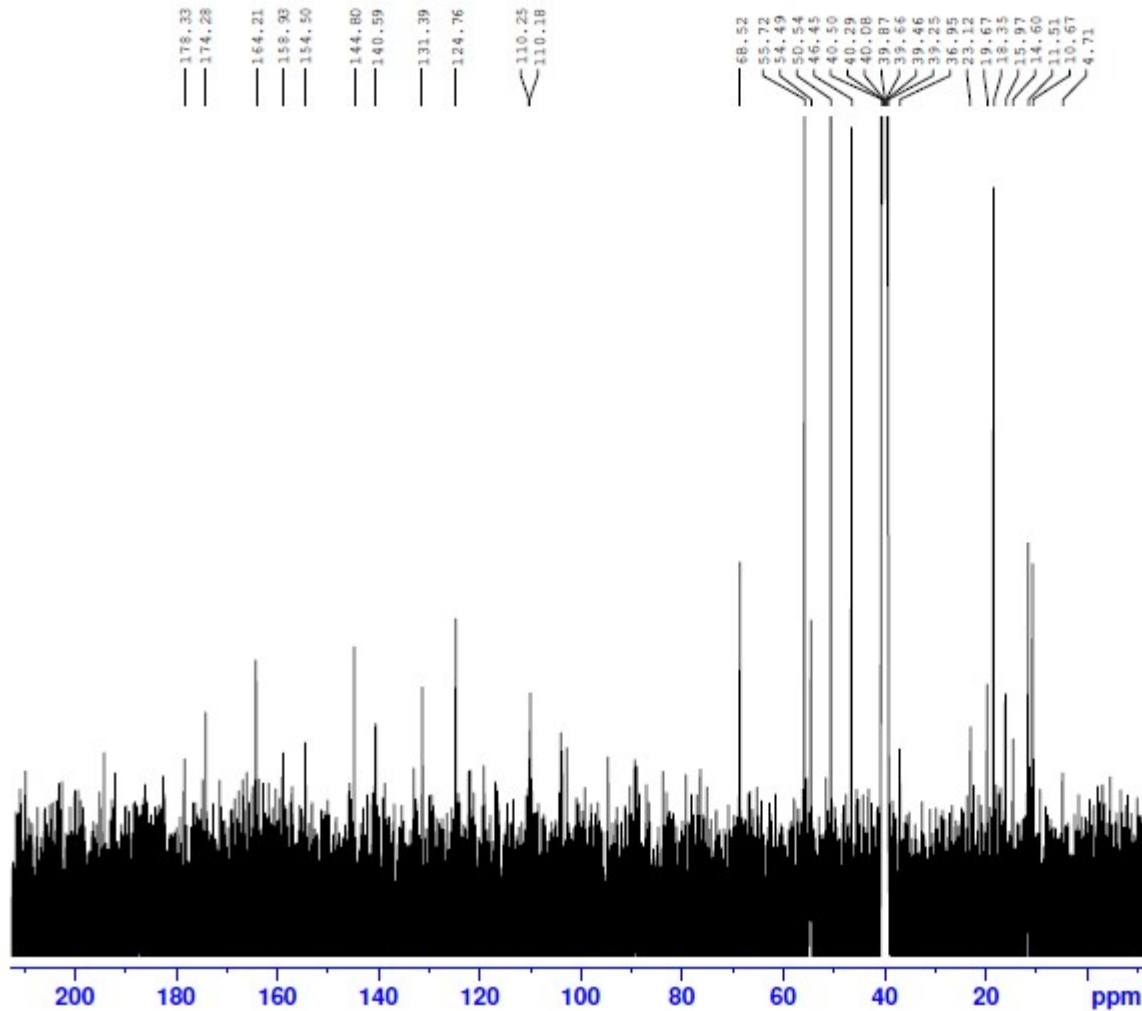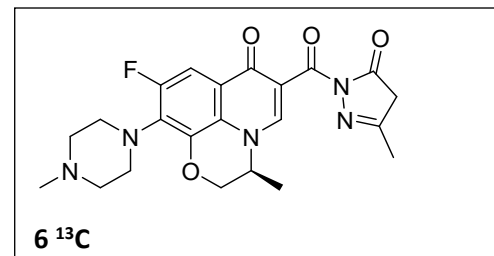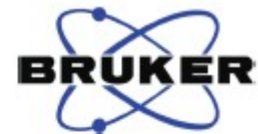

Current Data Parameters  
 NAME amira-youssef-EAA-red  
 EXPNO 2  
 PROCNO 1

F2 - Acquisition Parameters  
 Date\_ 20220209  
 Time 6.09  
 INSTRUM spect  
 PROSHD 5 mm PABBO BB/  
 PULPROG zgpg30  
 TD 65536  
 SOLVENT DMSO  
 NS 15000  
 DS 4  
 SWH 24038.461 Hz  
 FIDRES 0.366798 Hz  
 AQ 1.3631488 sec  
 RG 205.37  
 DW 20.800 usec  
 DE 6.50 usec  
 TE 299.9 K  
 D1 2.00000000 sec  
 D11 0.03000000 sec  
 TD0 1

----- CHANNEL #1 -----  
 SFO1 100.6278588 MHz  
 NUC1 13C  
 P1 10.00 usec  
 P1W1 47.00000000 W

----- CHANNEL #2 -----  
 SFO2 400.1516006 MHz  
 NUC2 1H  
 CPDPRG[2] waltz16  
 PCPD2 90.00 usec  
 P1W2 18.00000000 W  
 P1W12 0.34722000 W  
 P1W13 0.28125000 W

F2 - Processing parameters  
 SI 32768  
 SF 100.6177975 MHz  
 WDW EM  
 SSB 0  
 LB 1.00 Hz  
 GB 0  
 PC 1.40

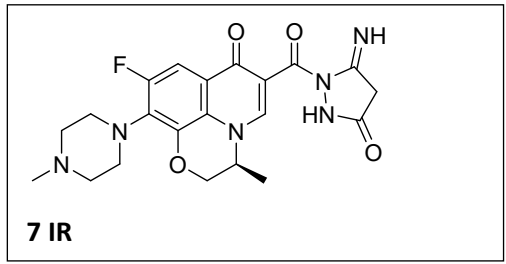

19

SHIMADZU

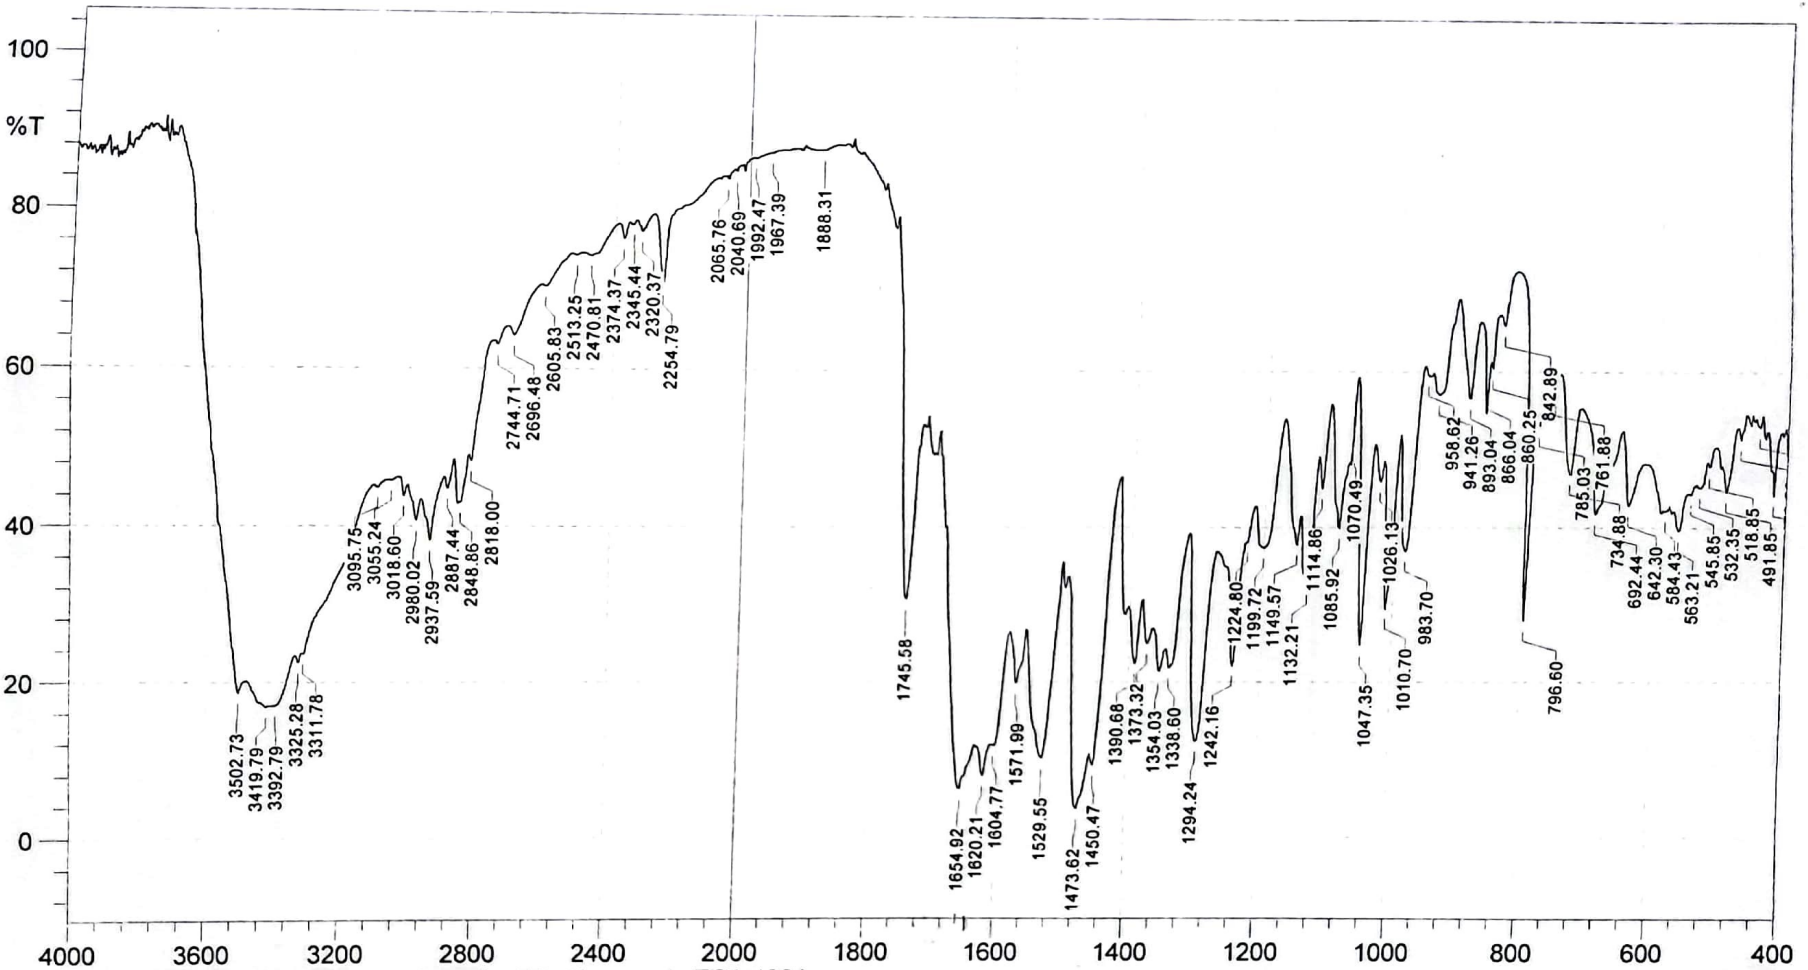



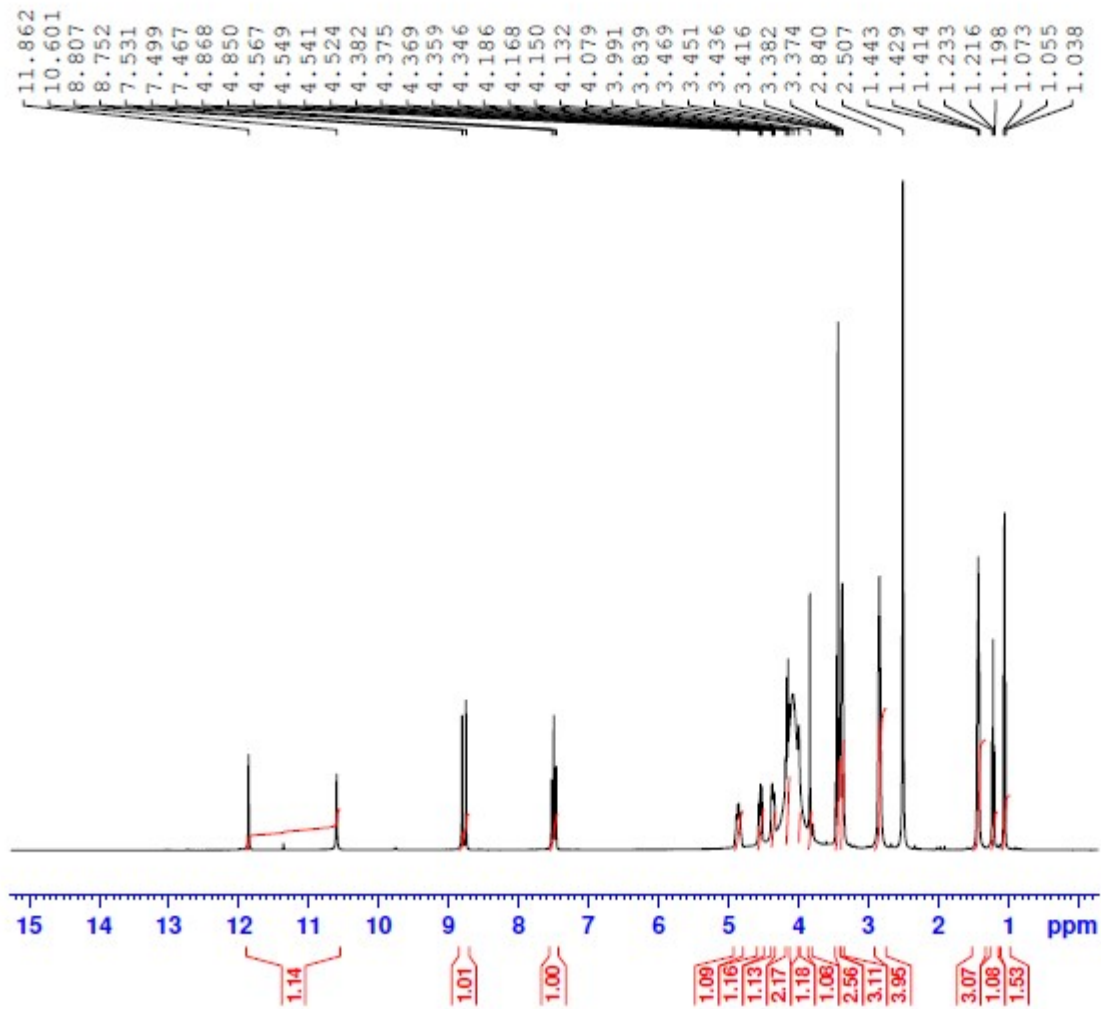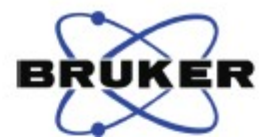

Current Data Parameters  
 NAME amira-youssef-EcyA  
 EXPNO 1  
 PROCNO 1

F2 - Acquisition Parameters  
 Date\_ 20220426  
 Time 10.38  
 INSTRUM spect  
 PROBHD 5 mm PABBO BB/  
 PULPROG zg30  
 ID 65536  
 SOLVENT DMSO  
 NS 97  
 DS 2  
 SWH 8012.820 Hz  
 FIDRES 0.122266 Hz  
 AQ 4.0894465 sec  
 RG 205.37  
 DW 62.400 usec  
 DE 6.50 usec  
 TE 300.0 K  
 D1 1.00000000 sec  
 TD0 1

==== CHANNEL f1 =====  
 SFO1 400.1524711 MHz  
 NUC1 1H  
 P1 12.00 usec  
 PLW1 18.00000000 W

F2 - Processing parameters  
 SI 65536  
 SF 400.1500000 MHz  
 WDW EM  
 SSB 0  
 LB 0.30 Hz  
 GB 0  
 PC 1.00

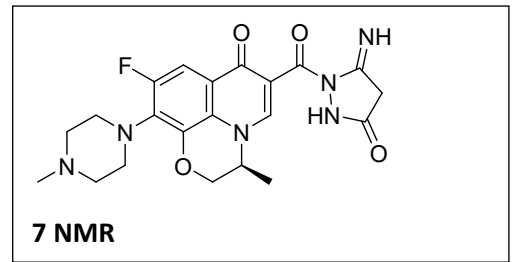



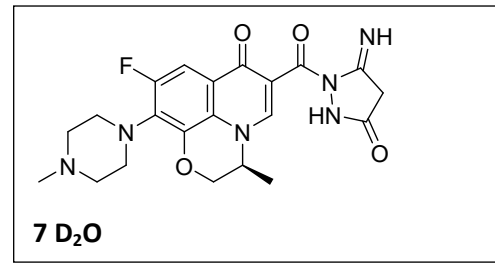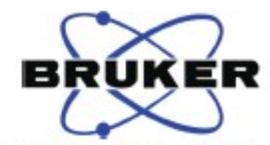

Current Data Parameters  
 NAME amira-youssef-EcyA-d2o  
 EXPNO 1  
 PROCNO 1

F2 - Acquisition Parameters  
 Date\_ 20220606  
 Time 8.09  
 INSTRUM spect  
 PROBHD 5 mm PABBO BB/  
 PULPROG zg30  
 TD 65536  
 SOLVENT DMSO  
 NS 56  
 DS 2  
 SWH 8012.820 Hz  
 FIDRES 0.122266 Hz  
 AQ 4.0894465 sec  
 RG 103.61  
 DW 62.400 usec  
 DE 6.50 usec  
 TE 300.0 K  
 D1 1.00000000 sec  
 TDO 1

----- CHANNEL f1 -----  
 SFO1 400.1524711 MHz  
 NUC1 1H  
 P1 12.00 usec  
 PIW1 18.00000000 W

F2 - Processing parameters  
 SI 65536  
 SF 400.1500000 MHz  
 WDW EM  
 SSB 0  
 LB 0.30 Hz  
 GB 0  
 PC 1.00

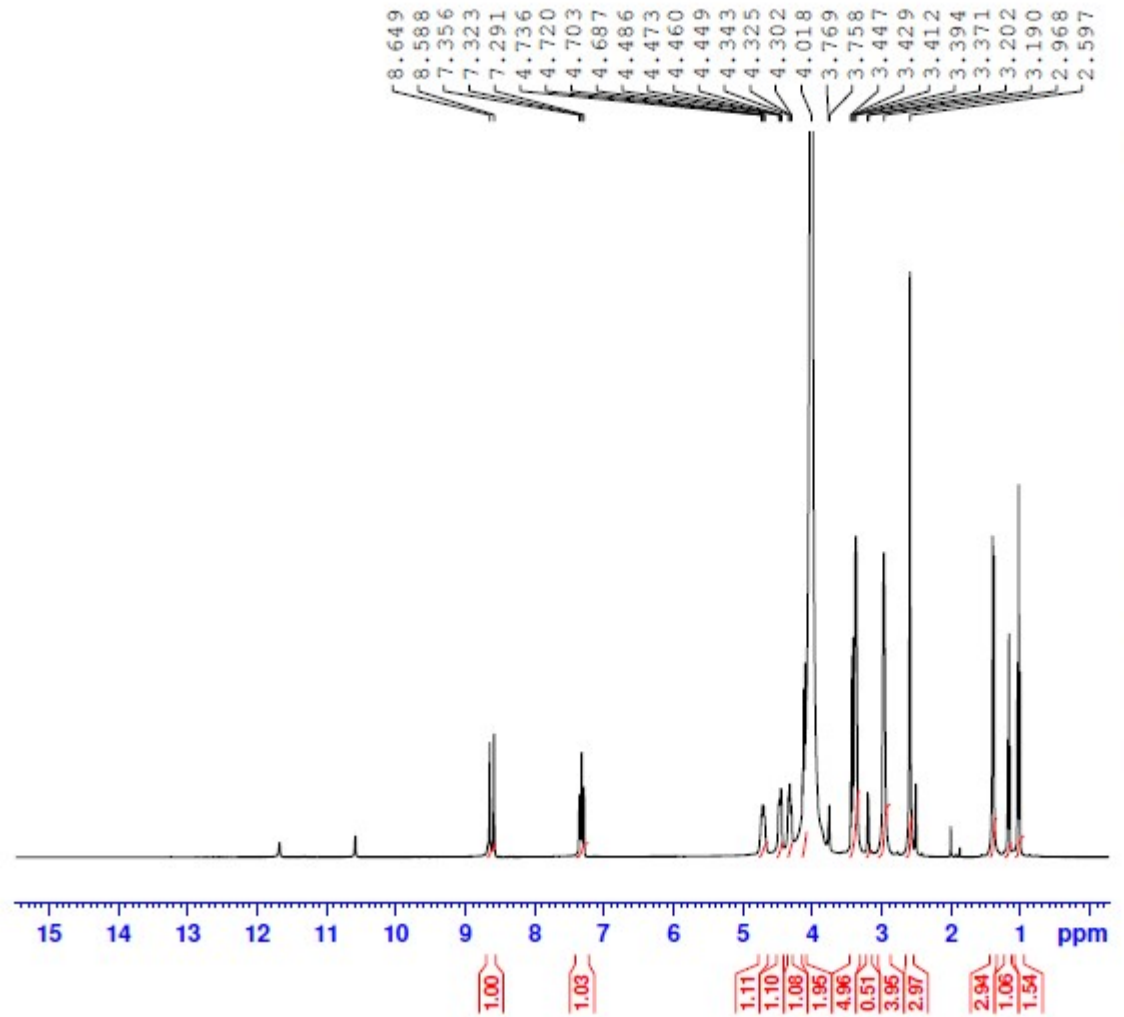

amira-youssef-EcyA.2.fid

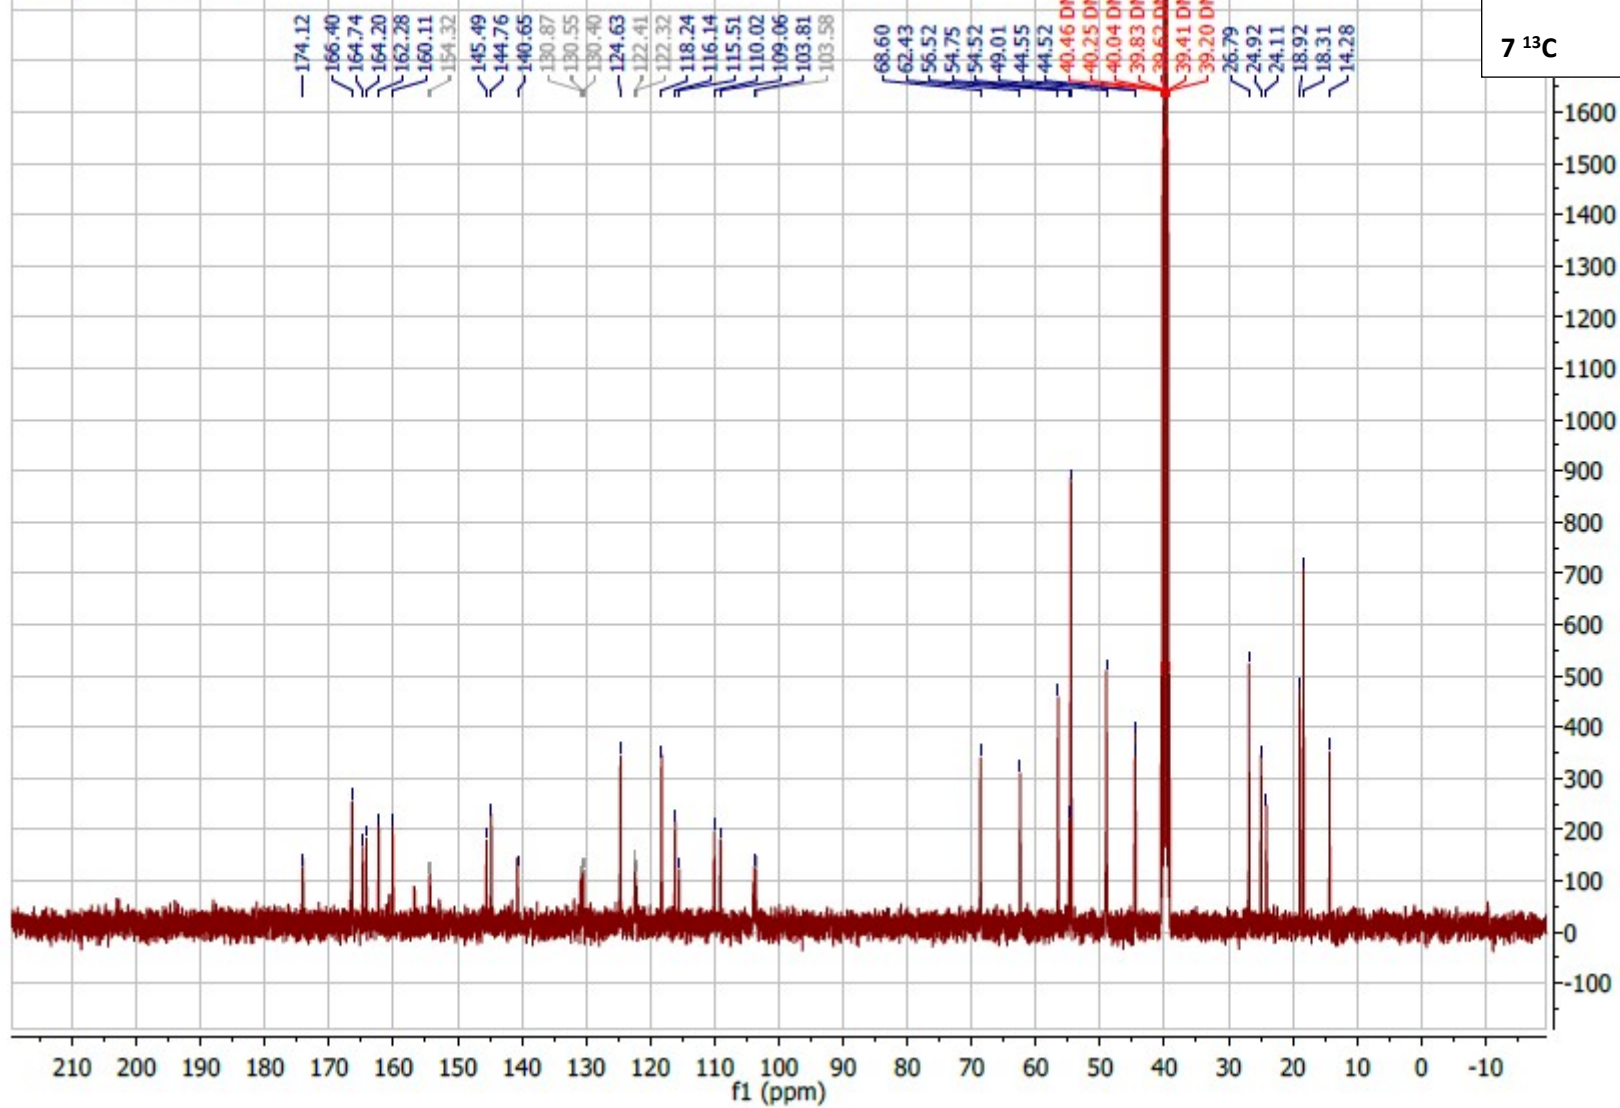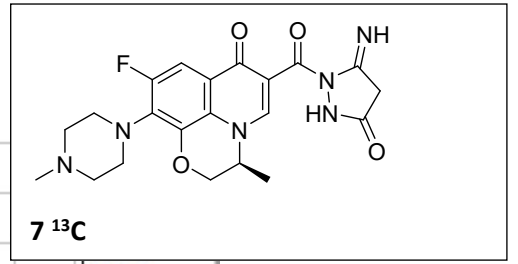

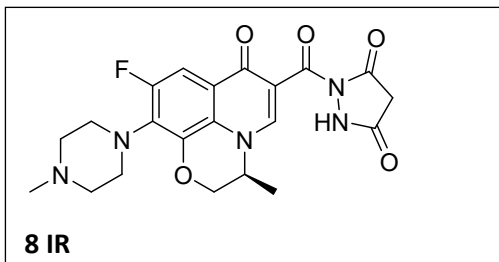

mp = 228-230°C

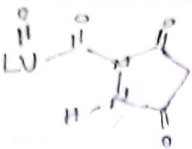

SHIMADZU

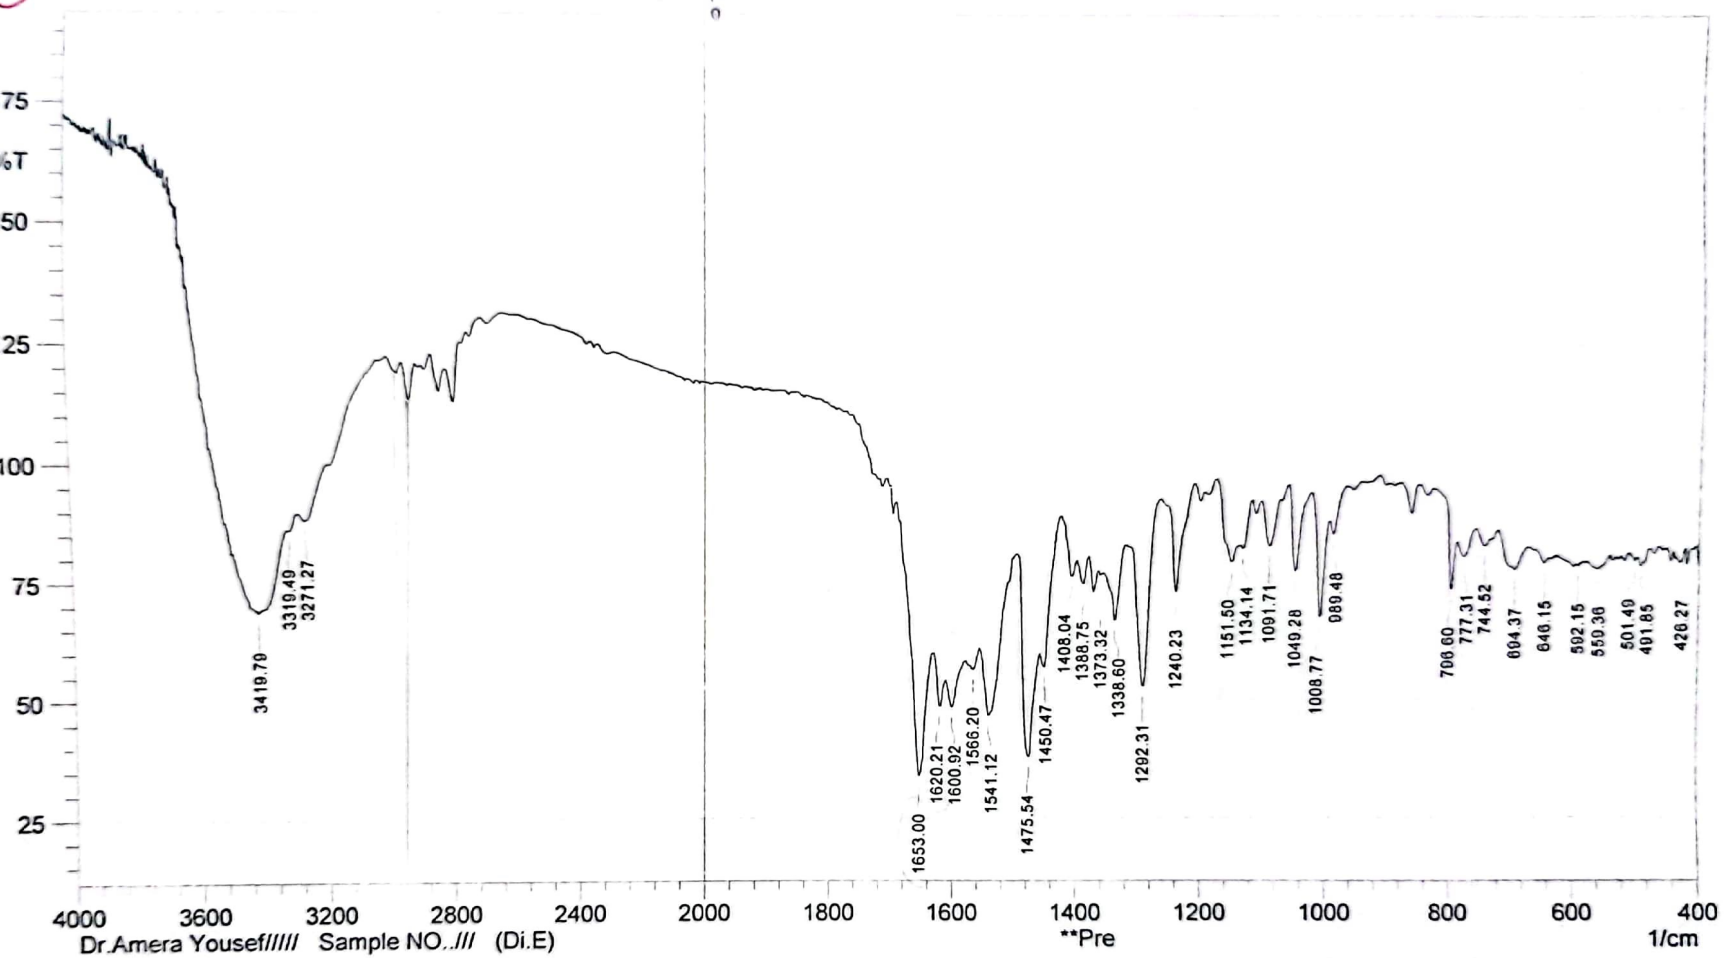

Amira Youssef\_H\_Malon

Microanalytical Unit - FOPCU - NMR laboratory  
www.pharma.cu.edu.eg dir-mau.fopcu@pharma.cu.edu.eg

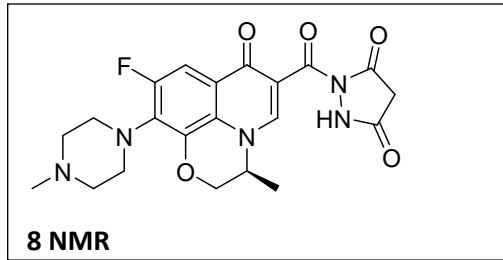

```

Current Data Parameters
NAME      Amira Youssef_H_Malon
EXPNO    10
PROCNO   1

F2 - Acquisition Parameters
Date_    20210802
Time     3.42
INSTRUM  spect
PROBHD   5 mm PABBO BH/
PULPROG  zg30
TD       65536
SOLVENT  DMSO
NS       32
DS       2
SWH      8012.820 Hz
FIDRES   0.122266 Hz
AQ       4.0894661 sec
RG       146.06
DM       62.400 umsec
DE       6.50 umsec
TE       298.1 K
D1       1.00000000 sec
TD0      1

----- CHANNEL f1 -----
SF01     400.1924713 MHz
NUC1      1H
P1        15.00 umsec
PLM1     10.39999962 W

F2 - Processing parameters
SI        65536
SF        400.1900000 MHz
WDW       EM
SSB       0
LB        0.30 Hz
GB        0
PC        1.00
    
```

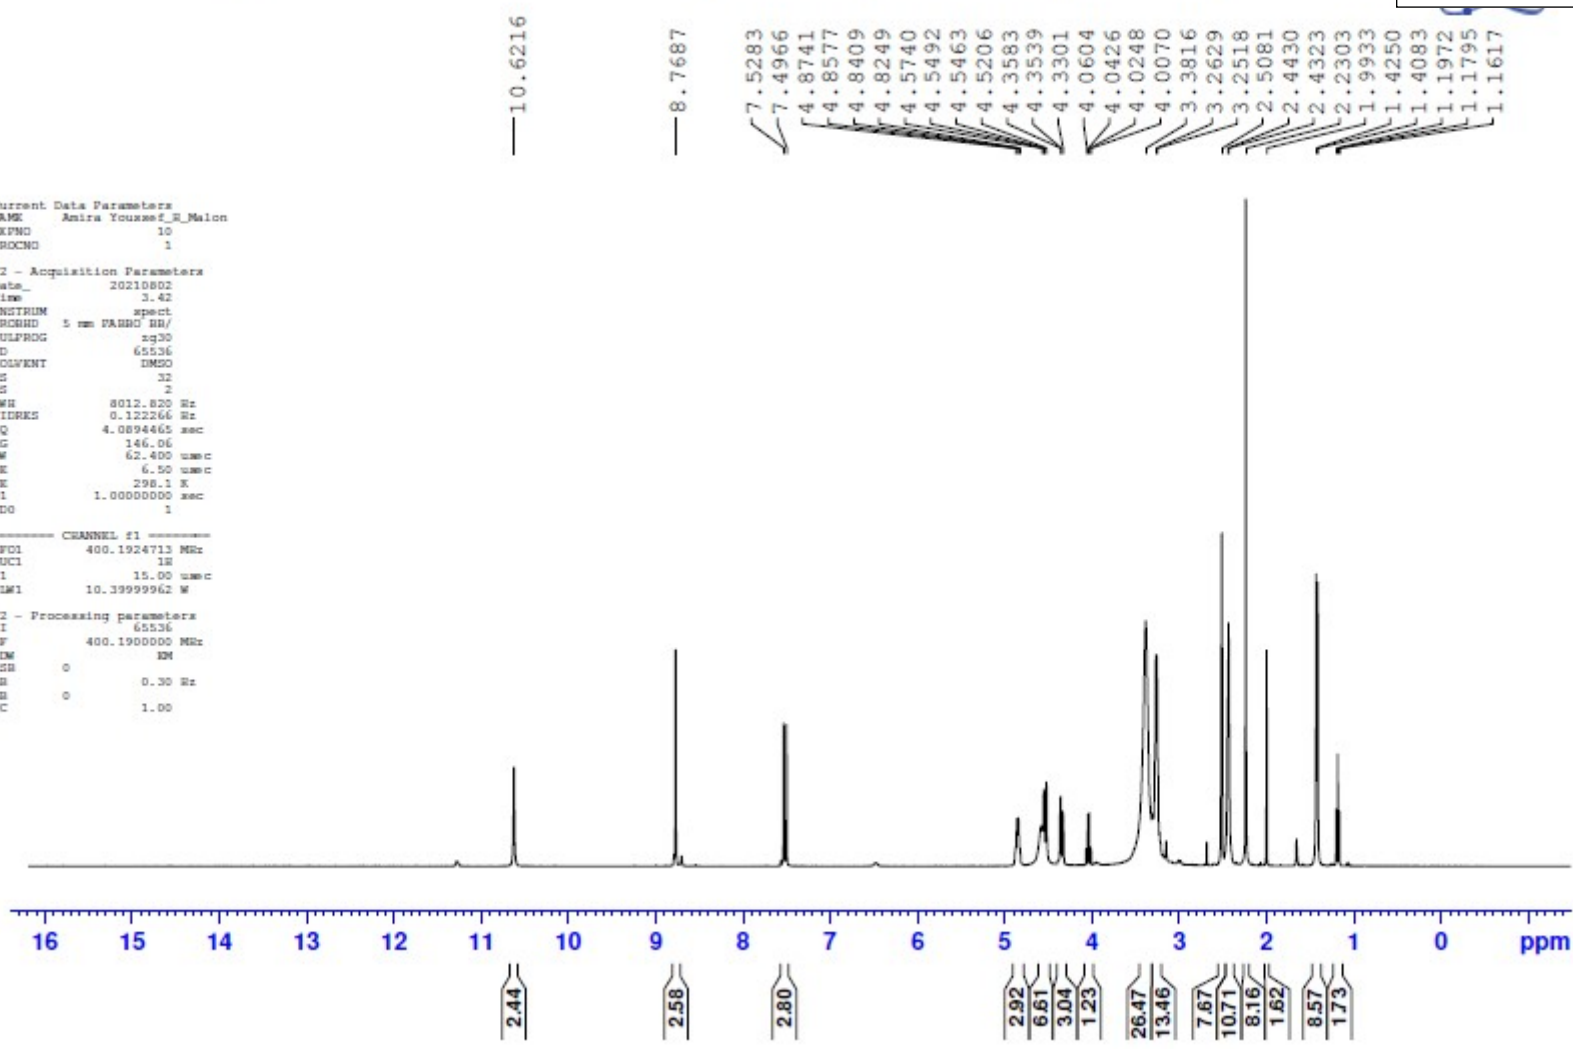

Amira Youssef\_H\_malon\_D2O

Microanalytical Unit - FOPCU - NMR laboratory  
www.pharma.cu.edu.eg dir-mau.fopcu@pharma.cu.edu.eg

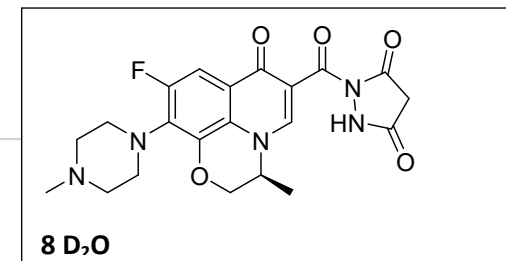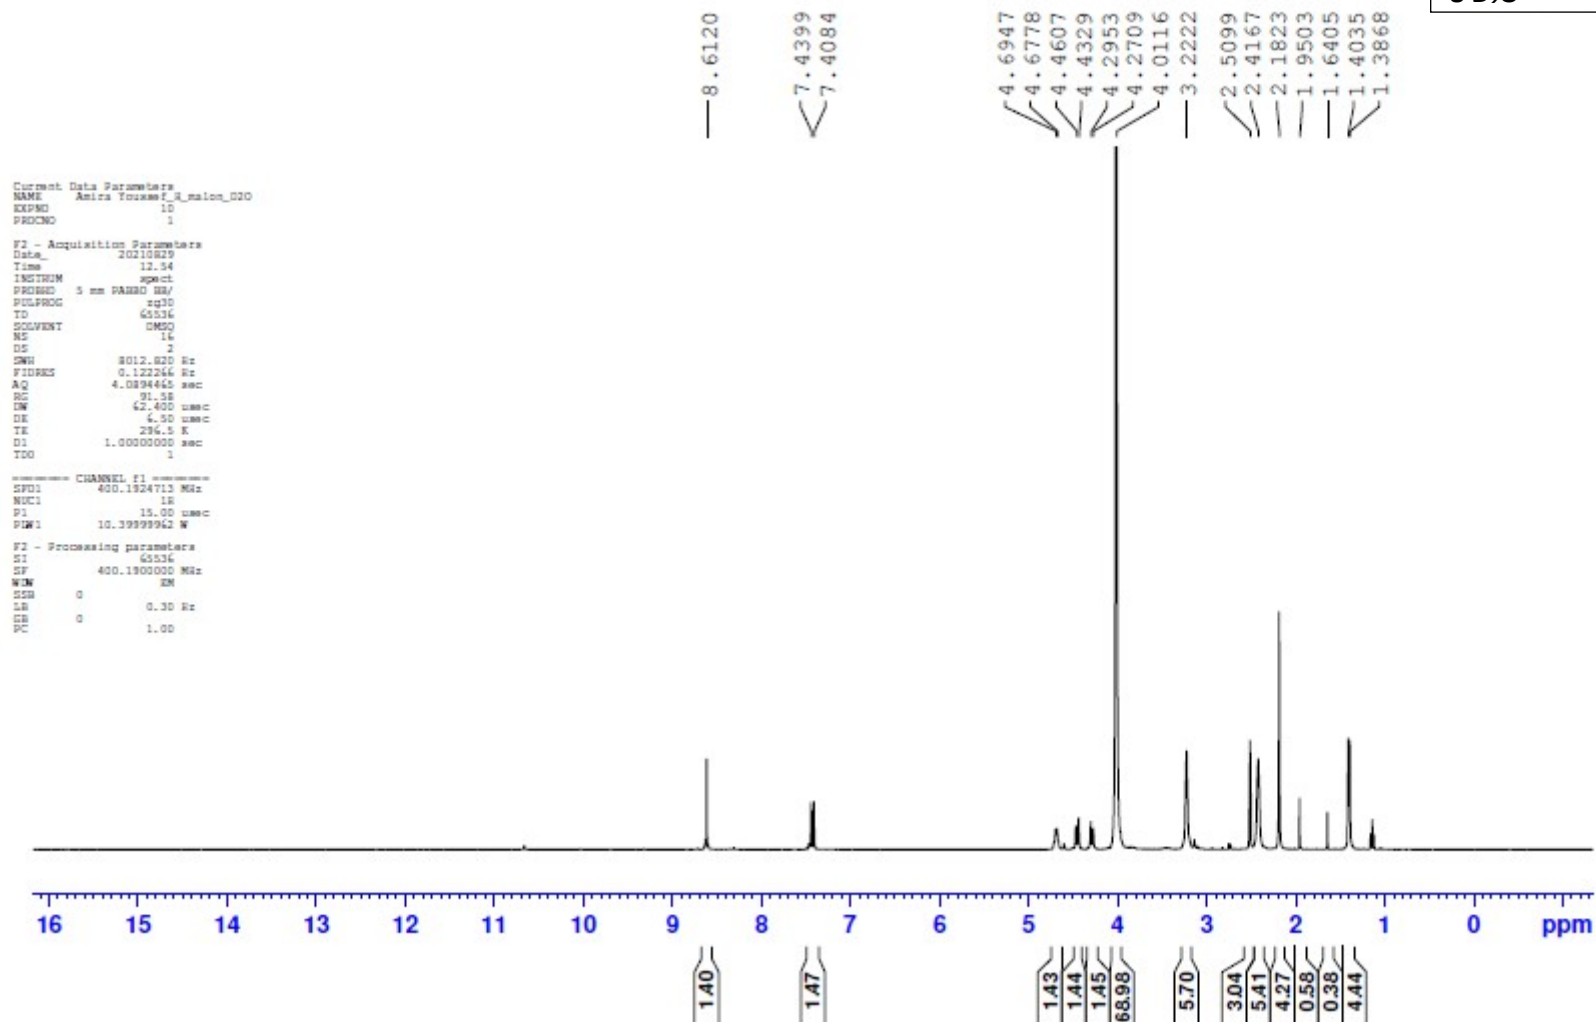

Amira Youssef\_C\_malon

Microanalytical Unit - FOPCU - NMR laboratory  
 www.pharma.cu.edu.eg dir-mau.fopcu@pharma.cu.edu.eg

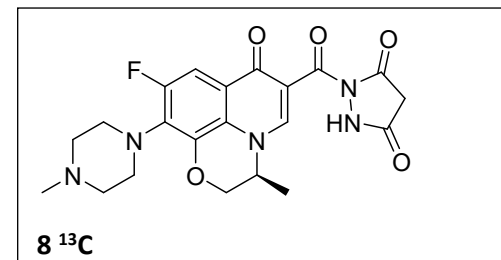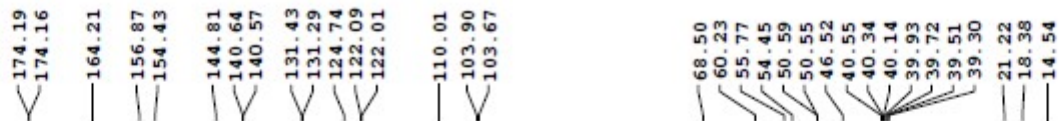

Current Data Parameters  
 NAME Amira Youssef\_C\_malon  
 EXPNO 10  
 PROCNO 1

F2 - Acquisition Parameters  
 Date\_ 20210826  
 Time 20.17  
 INSTRUM spect  
 PROBHD 5 mm PABBO BB/  
 PULPROG zgpg30  
 ID 65536  
 SOLVENT DMSO  
 NS 1500  
 DS 4  
 SWH 24038.461 Hz  
 FIDRES 0.366798 Hz  
 AQ 1.3631488 sec  
 RG 202.37  
 LW 20.800 usac  
 DE 6.50 usac  
 TE 298.0 K  
 D1 2.00000000 sec  
 D11 0.03000000 sec  
 TDO 1

CHANNEL f1  
 SFO1 100.6379178 MHz  
 NUC1 13C  
 P1 10.00 usac  
 PLW1 45.00000000 W

CHANNEL f2  
 SFO2 400.1916008 MHz  
 NUC2 1H  
 CPDPRG[2] waltz16

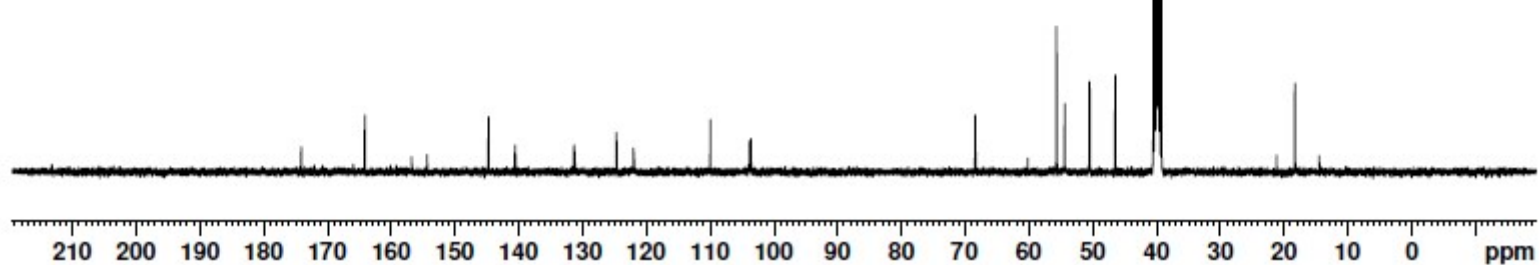

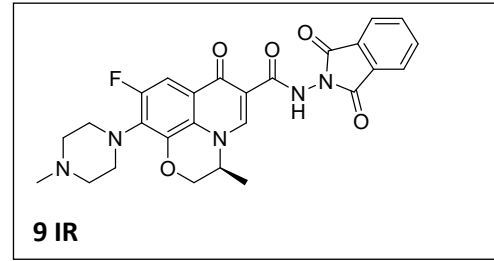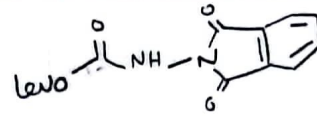

SHIMADZU

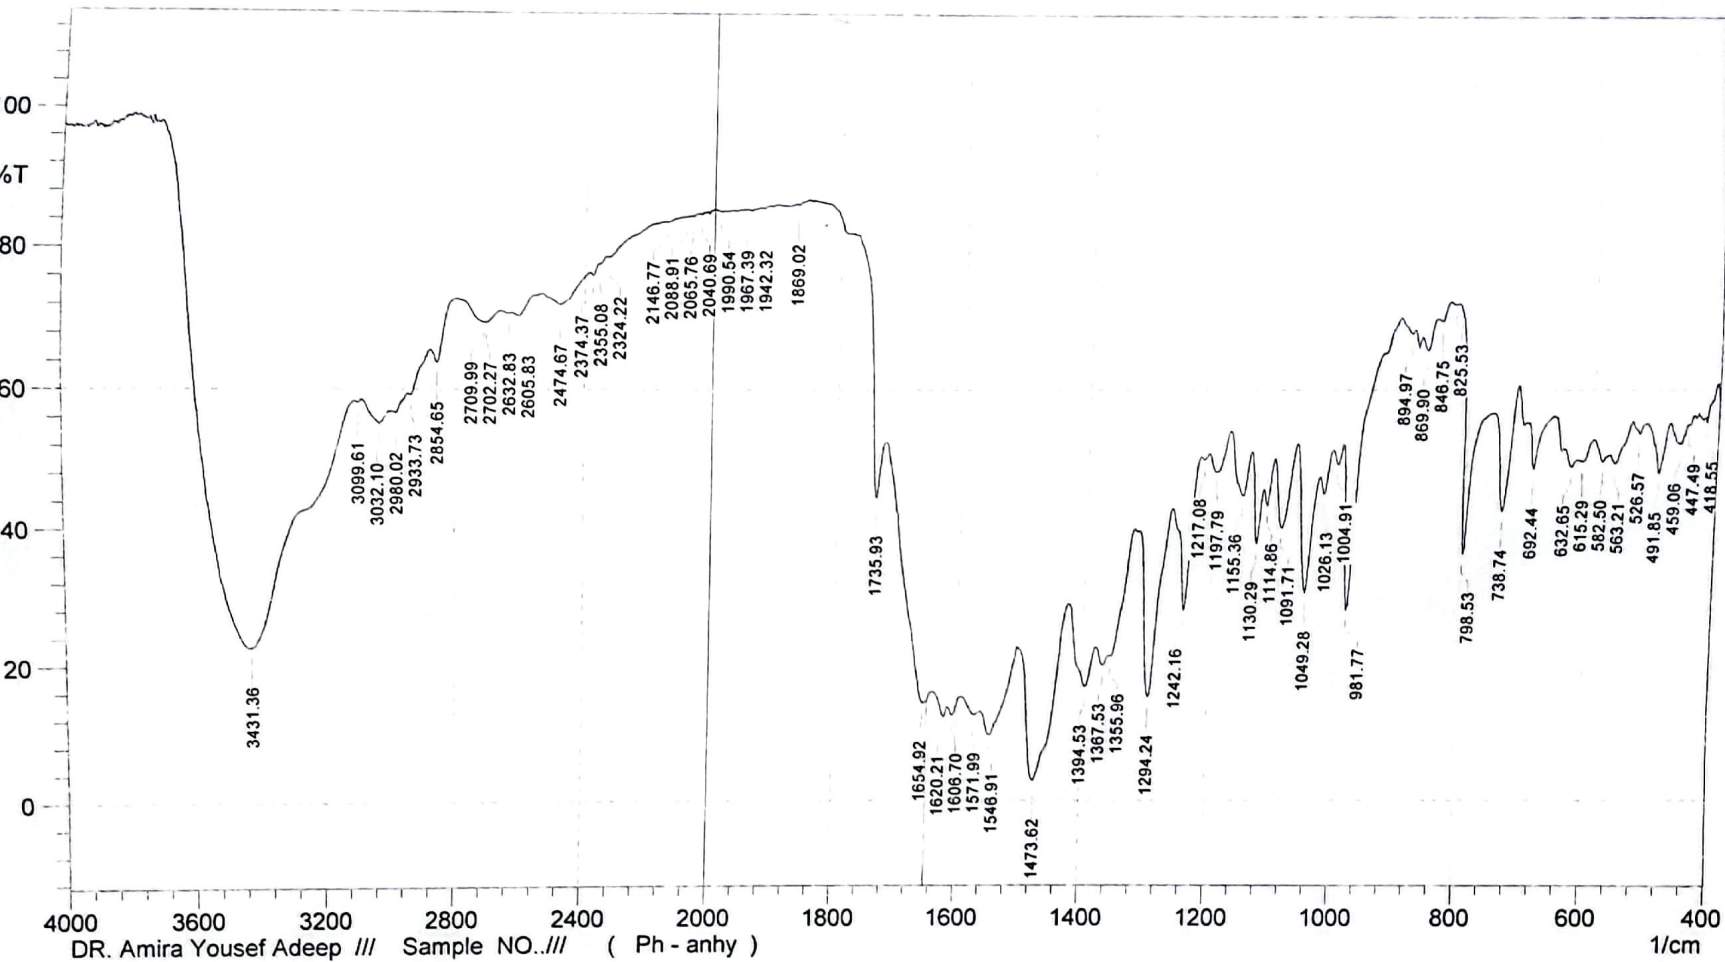



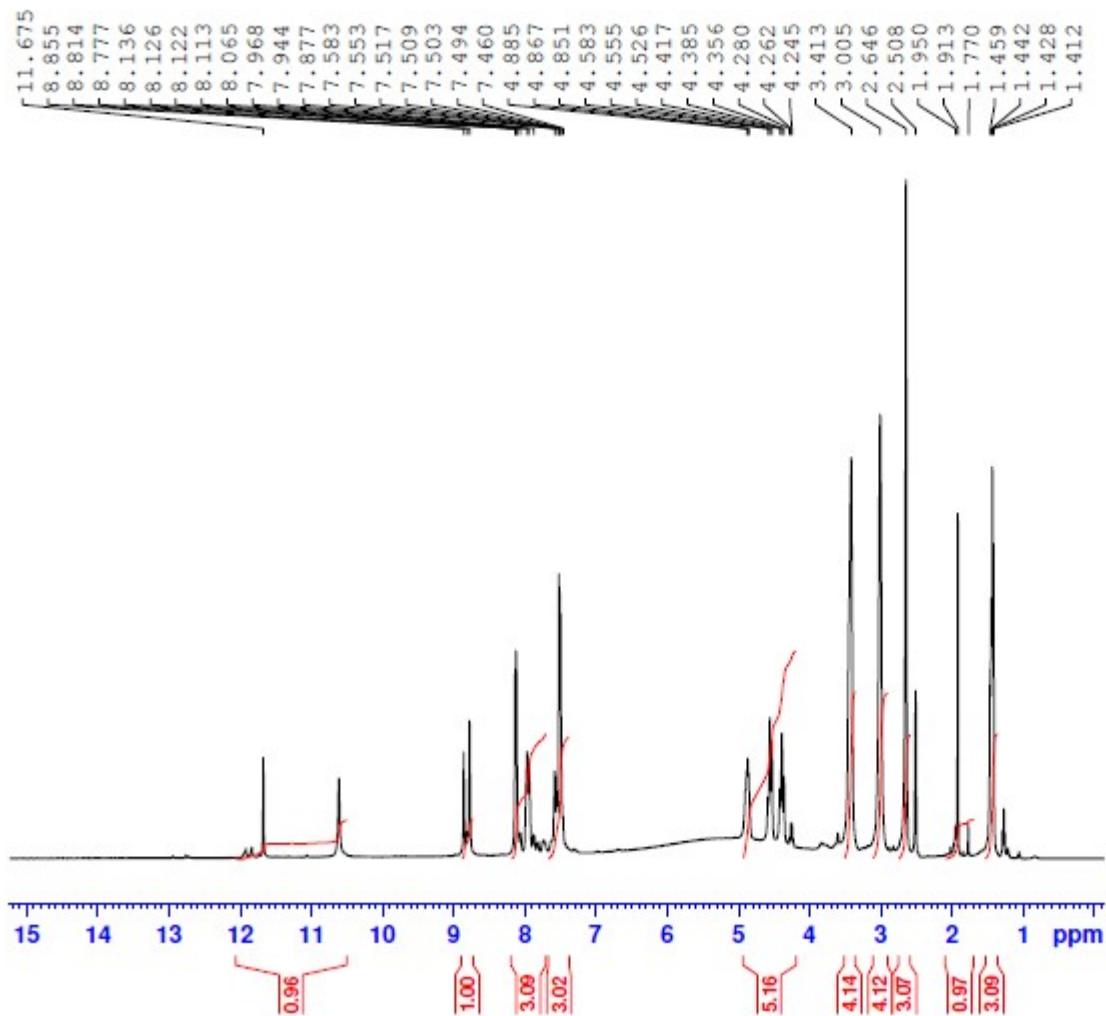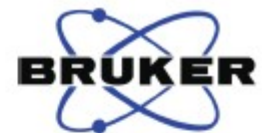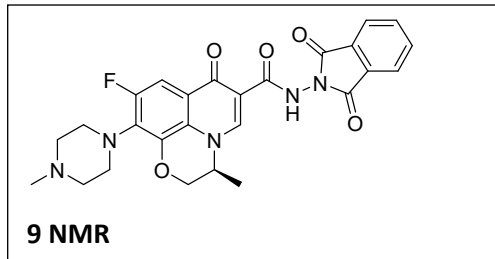

Current Data Parameters  
 NAME amira-youssef-Ph-anh  
 EXPNO 1  
 PROCNO 1

F2 - Acquisition Parameters  
 Date\_ 20220426  
 Time 10.27  
 INSTRUM spect  
 PROBHD 5 mm PABBO BB/  
 PULPROG zg30  
 ID 65536  
 SOLVENT DMSO  
 NS 52  
 DS 2  
 SWH 8012.820 Hz  
 FIDRES 0.122266 Hz  
 AQ 4.0894465 sec  
 RG 205.37  
 DW 62.400 usec  
 DE 6.50 usec  
 TE 300.0 K  
 D1 1.00000000 sec  
 TDO 1

==== CHANNEL f1 =====  
 SFO1 400.1524711 MHz  
 NUC1 1H  
 P1 12.00 usec  
 PLW1 18.00000000 W

F2 - Processing parameters  
 SI 65536  
 SF 400.1500000 MHz  
 WDW EM  
 SSB 0  
 LB 0.30 Hz  
 CB 0  
 PC 1.00

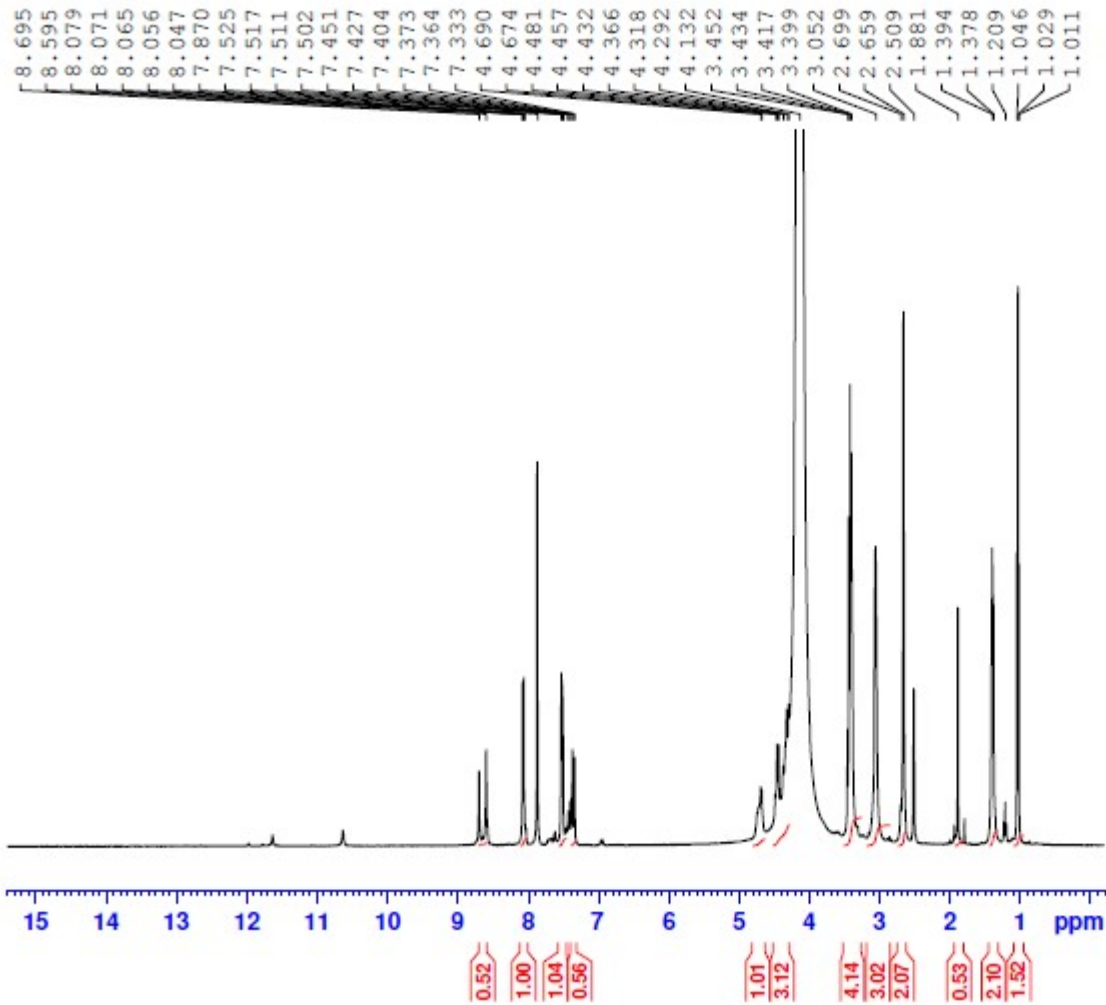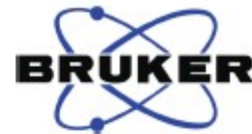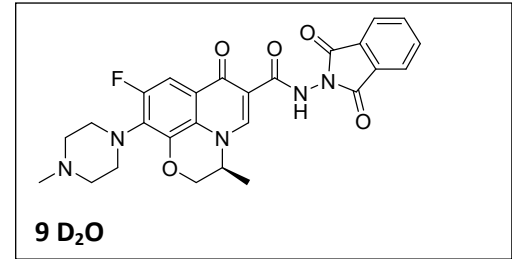

Current Data Parameters  
 NAME amira-youssef-Ph-anh-d2o  
 EXPNO 1  
 PROCNO 1

F2 - Acquisition Parameters  
 Date\_ 20220606  
 Time 8.02  
 INSTRUM spect  
 PROBHD 5 mm PABBO BB/  
 PULPROG zg30  
 TD 65536  
 SOLVENT DMSO  
 NS 41  
 DS 2  
 SWH 8012.820 Hz  
 FIDRES 0.122266 Hz  
 AQ 4.0894465 sec  
 RG 103.61  
 RW 62.400 usec  
 DE 6.50 usec  
 TE 300.0 K  
 D1 1.00000000 sec  
 TDO 1

----- CHANNEL f1 -----  
 SFO1 400.1524711 MHz  
 NUC1 1H  
 P1 12.00 usec  
 PL1 18.00000000 W

F2 - Processing parameters  
 SI 65536  
 SF 400.1500000 MHz  
 WDW EM  
 SSB 0  
 LB 0.30 Hz  
 GB 0  
 PC 1.00

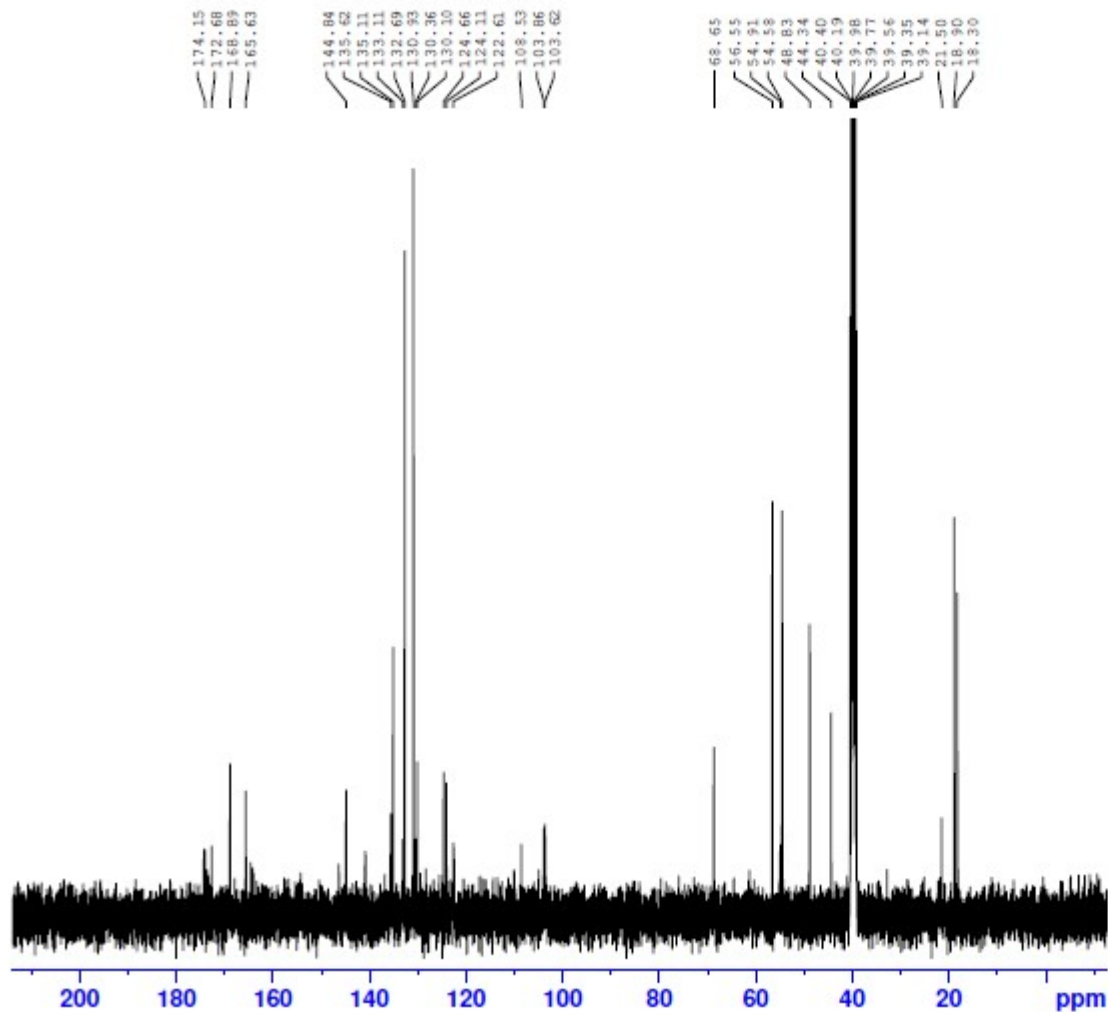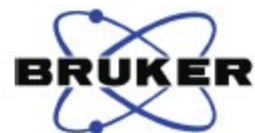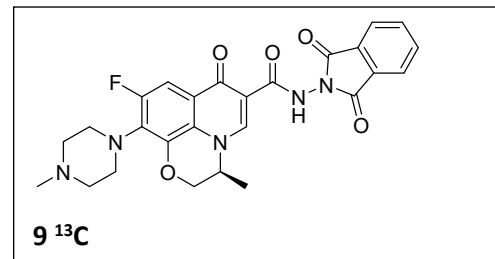

Current Data Parameters  
 NAME amira-youssef-Ph-anh  
 EXPNO 2  
 PROCNO 1

F2 - Acquisition Parameters  
 Date\_ 20220531  
 Time 9.06  
 INSTRUM spect  
 PROBHD 5 mm PABBO BB/  
 PULPROG zgpg30  
 TD 65536  
 SOLVENT DMSO  
 NS 1226  
 DS 4  
 SWH 24038.461 Hz  
 FIDRES 0.366798 Hz  
 AQ 1.3631488 sec  
 RG 205.37  
 DW 20.800 usec  
 DE 6.50 usec  
 TE 300.0 K  
 D1 2.0000000 sec  
 D11 0.0300000 sec  
 TD0 1

===== CHANNEL f1 =====  
 SFO1 100.6278588 MHz  
 NUC1 13C  
 P1 10.00 usec  
 PLW1 47.0000000 W

===== CHANNEL f2 =====  
 SFO2 400.1516006 MHz  
 NUC2 1H  
 CPDPRG[2] waltz16  
 PCPD2 90.00 usec  
 PLW2 18.0000000 W  
 PLW12 0.3472200 W  
 PLW13 0.2812500 W

F2 - Processing parameters  
 SI 32768  
 SF 100.6177975 MHz  
 WDW EM  
 SSB 0  
 LB 1.00 Hz  
 GB 0  
 PC 1.40

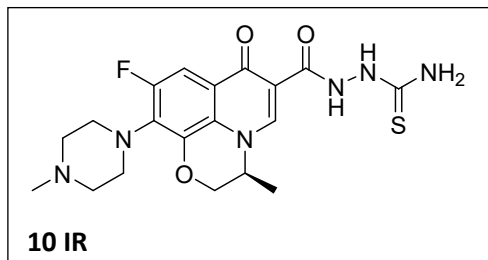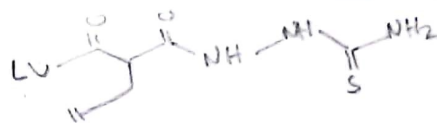

SHIMADZU

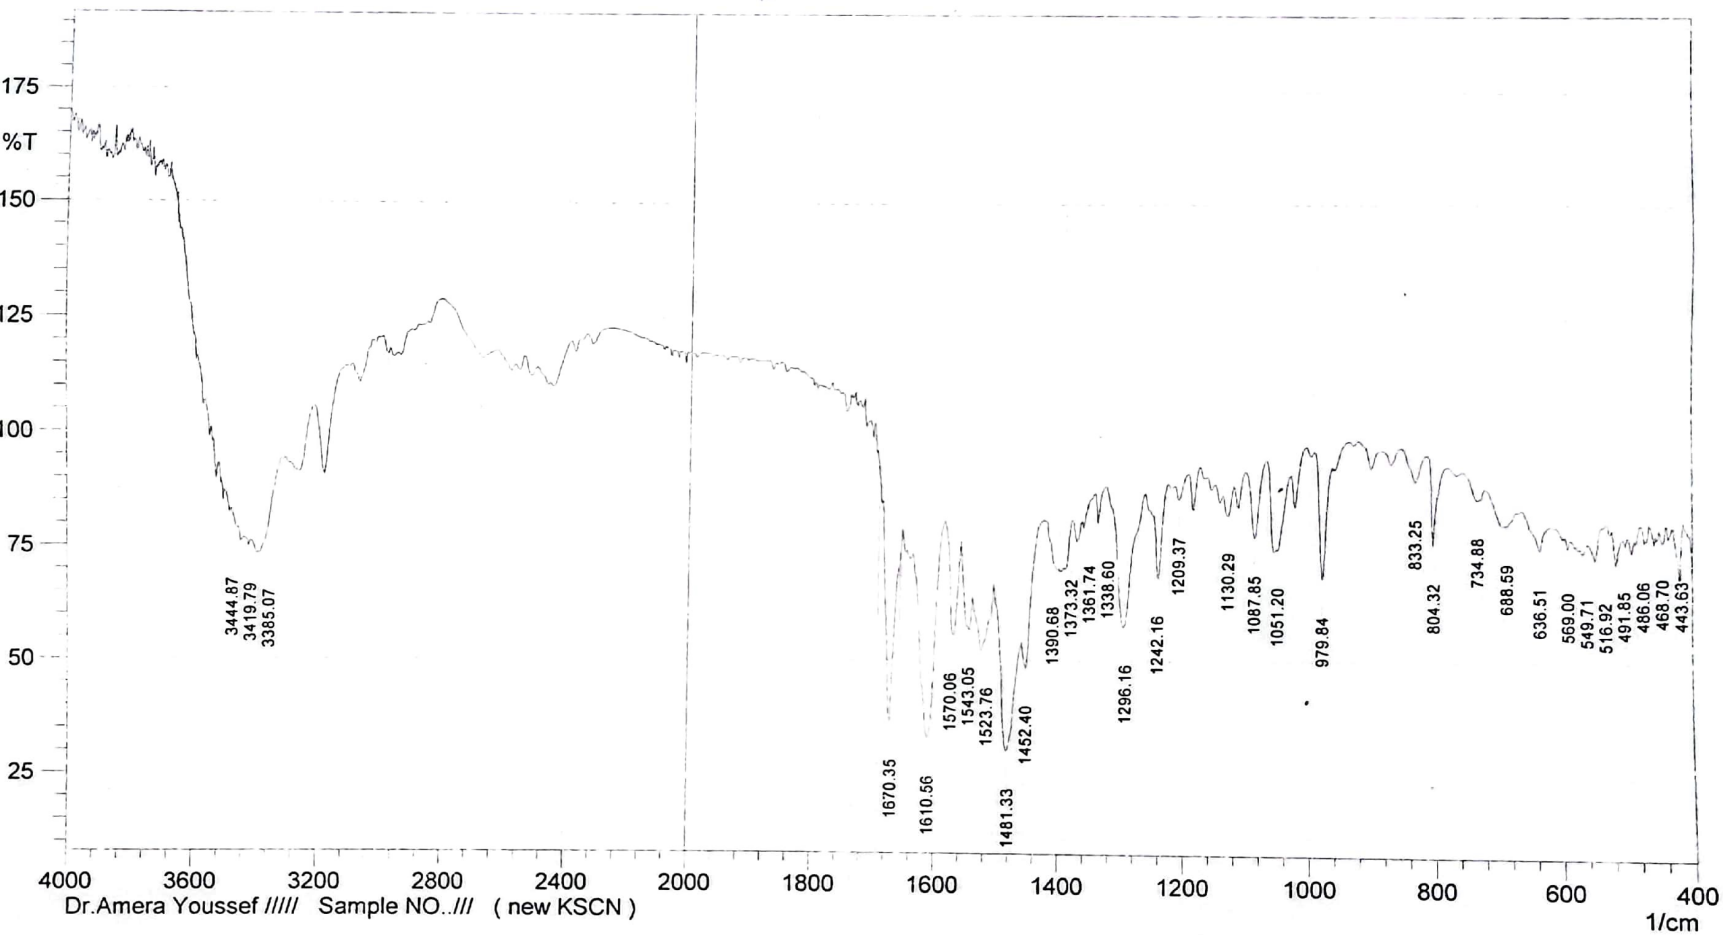

Amira Youssef\_H\_new-KSCN

Microanalytical Unit - FOPCU - NMR laboratory  
 www.pharma.cu.edu.eg dir-mau.fopcu@pharma.cu.edu.eg

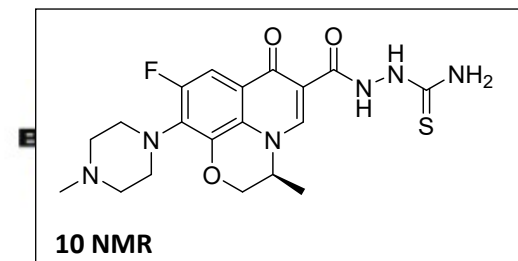

11.3979  
 11.2050  
 9.4001  
 8.8374  
 7.8920  
 7.5994  
 7.5688  
 4.9255  
 4.9087  
 4.6004  
 4.5739  
 4.3988  
 4.3749  
 3.6409  
 3.6118  
 3.5324  
 3.4491  
 3.4312  
 3.3641  
 3.1533  
 2.8078  
 2.5078  
 1.4435

```

Current Data Parameters
NAME      Amira Youssef_H_new-KSCN
EXPNO    10
PROCNO    1

F2 - Acquisition Parameters
Date_     20211005
Time      14.29
INSTRUM   spect
PROBHD    5 mm PABBO BB/
PULPROG   zg30
TD         65536
SOLVENT   DMSO
NS         32
DS         2
SWH        8012.820 Hz
FIDRES     0.122264 Hz
AQ         4.0894465 sec
RG         129.43
SQ         62.400 usec
DE         4.50 usec
TE         298.0 K
D1         1.0000000 sec
TDO        1

===== CHANNEL f1 =====
SF01      400.1924713 MHz
NUC1       1H
P1         15.00 usec
PL1        0.39999962 W

F2 - Processing parameters
SI         65536
SF         400.1900000 MHz
WDW        EM
SSB        0
LB         0.30 Hz
GB         0
PC         1.00
    
```

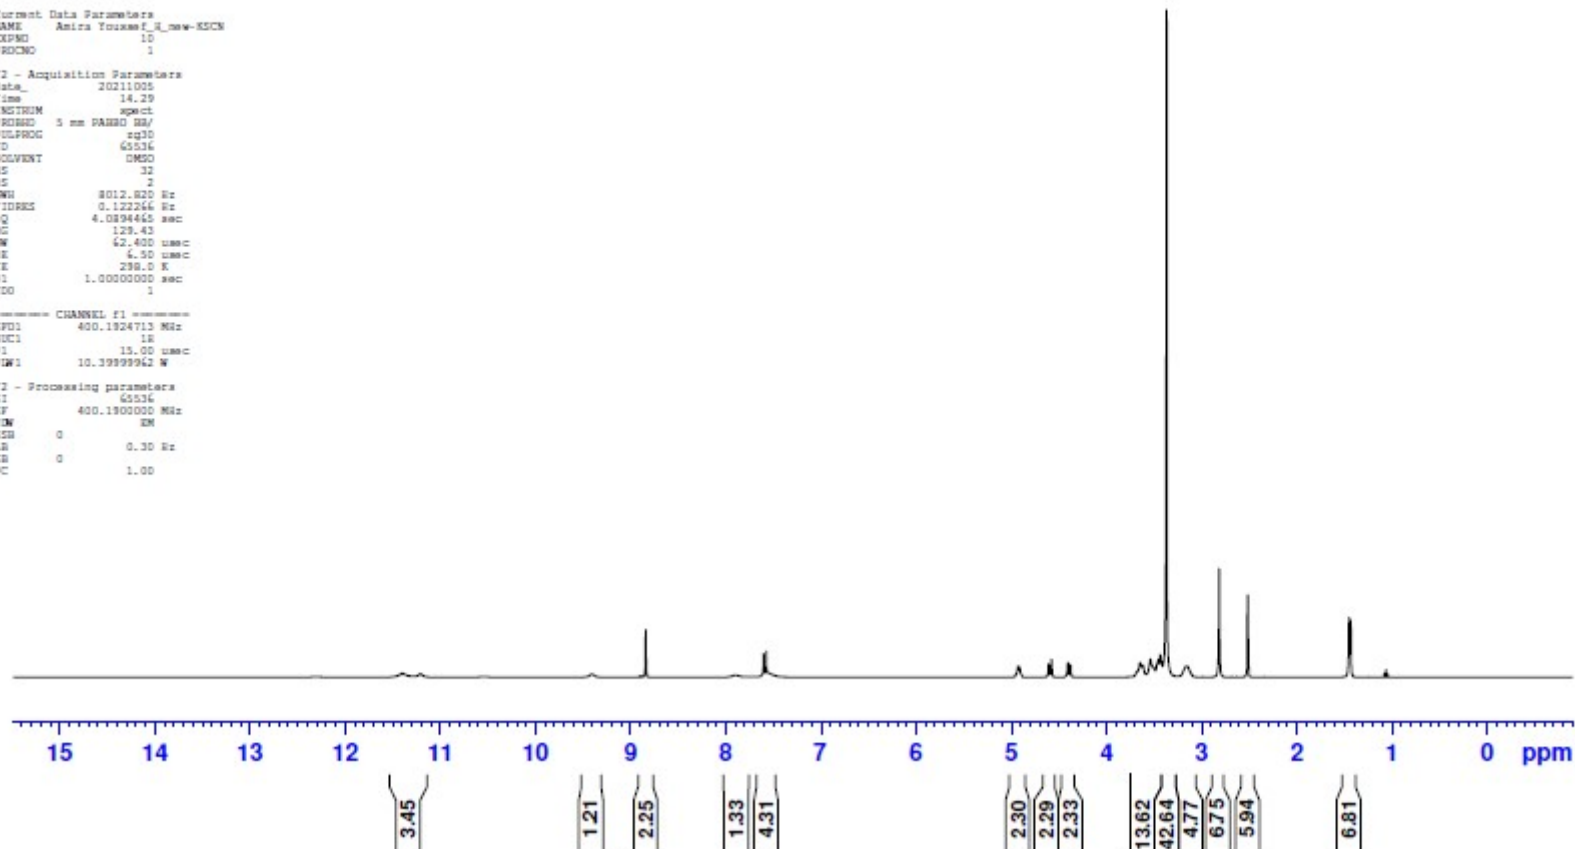

Amira Youssef\_H\_newKSCN\_D2O

Microanalytical Unit - FOPCU - NMR laboratory  
 www.pharma.cu.edu.eg dir-mau.fopcu@pharma.cu.edu.eg

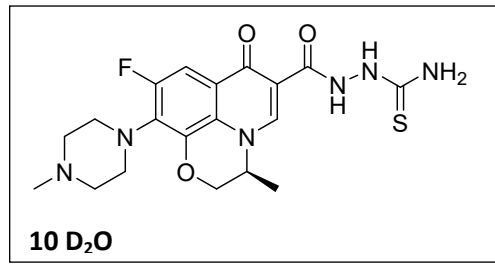

```

Current data parameters
NAME Amira Youssef_H_newKSCN_D2O
EXPNO 10
PROCNO 1
F2 - Acquisition parameters
Date_ 20211024
Time 12.51
INSTRUM spect
PROBHD 1 mm WALTZ16
PULPROG zgpg30
TD 65536
SOLVENT dmsd
NS 32
DS 2
SWH 5013.820 Hz
FIDRES 0.122266 Hz
AQ 4.008460 sec
RG 126.37
OR 62.400 umax
OB 6.50 umax
TE 300.2 K
SI 1.00000000 sec
TO 1
===== Channel f1 =====
NUC1 400.1424713 MHz
NUC2 1H
P1 15.00 umax
PL1 10.39489962 dB
F2 - Processing parameters
SI 400.1424713 MHz
WDW EM
SSB 0
LB 0.30 Hz
GB 0
PC 1.00
    
```

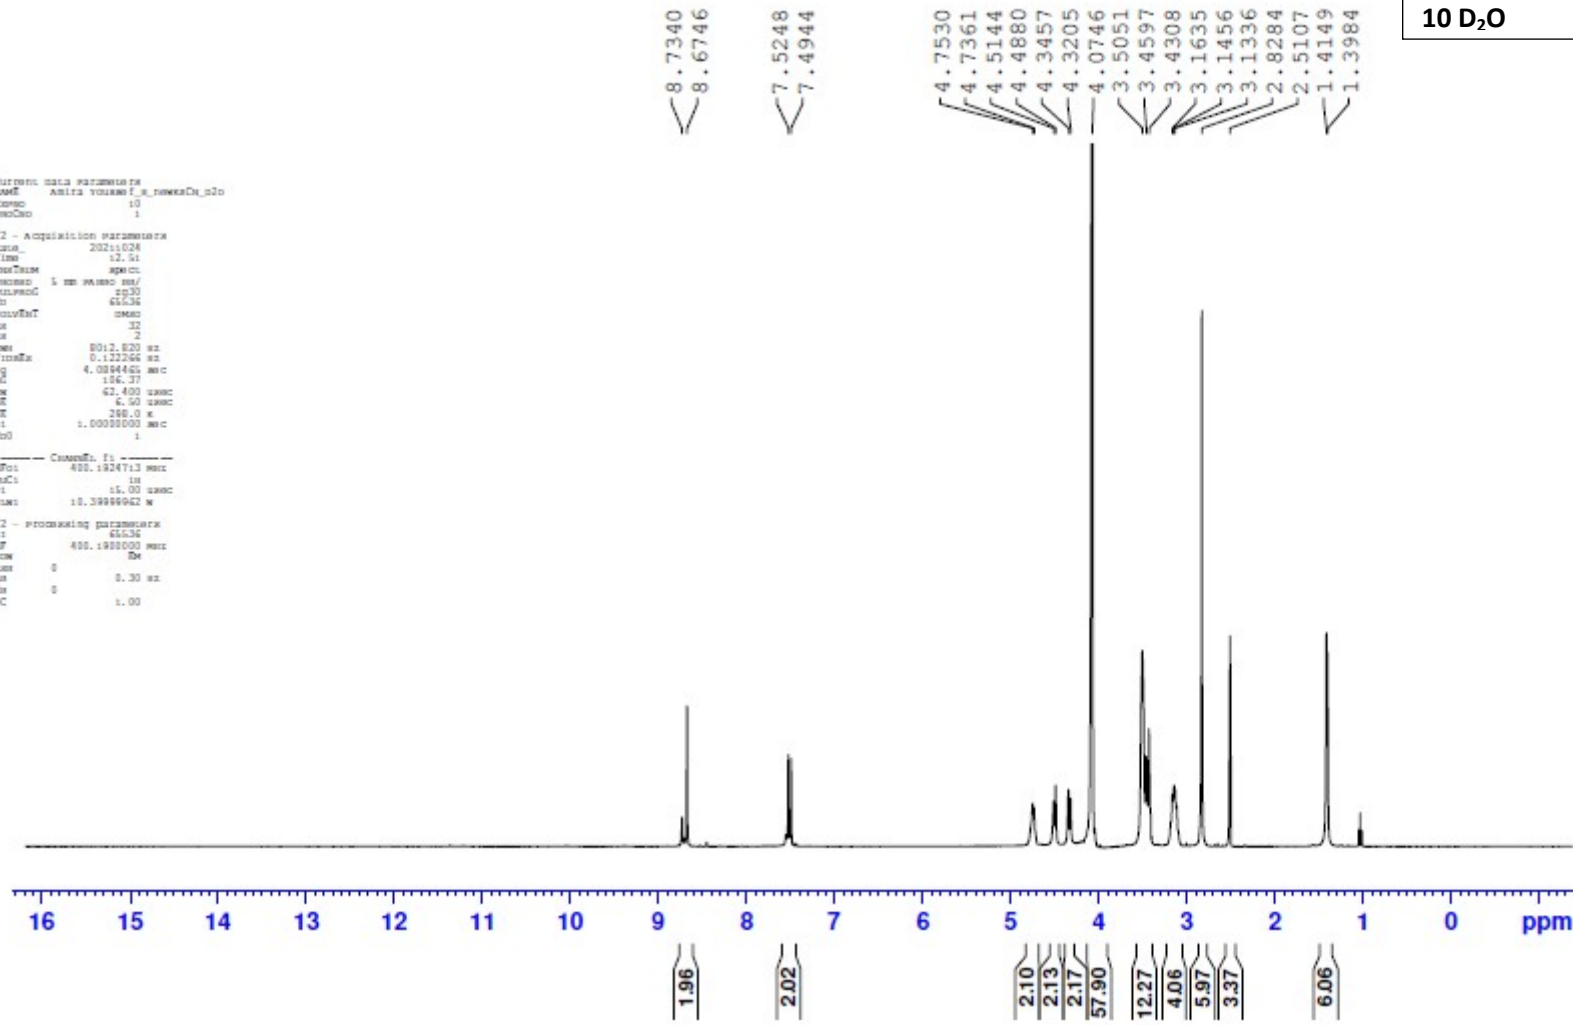

Amira Youssef\_C\_newKSCN

Microanalytical Unit - FOPCU - NMR laboratory  
www.pharma.cu.edu.eg dir-mau.fopcu@pharma.cu.edu.eg

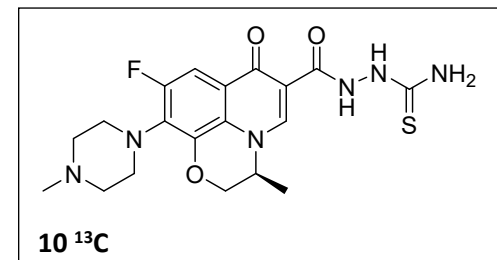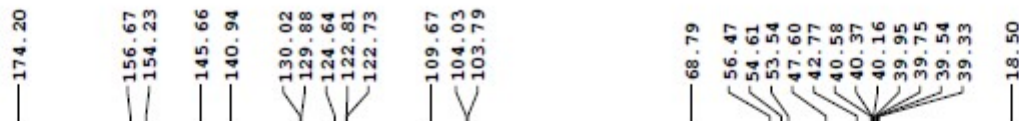

Current Data Parameters  
NAME Amira Youssef\_C\_newKSCN  
EXPNO 10  
PROCNO 1

F2 - Acquisition Parameters  
Date\_ 20211022  
Time 17.12  
INSTRUM spect  
PROBHD 5 mm PABBO HS/  
PULPROG zgpg30  
TD 65536  
SOLVENT DMSO  
NS 1500  
DS 4  
SWH 24038.461 Hz  
FIDRES 0.366798 Hz  
AQ 1.3631488 sec  
RG 202.37  
DW 20.800 usec  
DE 6.50 usec  
TE 298.0 K  
D1 2.00000000 sec  
D11 0.03000000 sec  
TDO 1

----- CHANNEL f1 -----  
SFO1 100.6379178 MHz  
NUC1 13C  
P1 10.00 usec  
PIW1 45.00000000 W

----- CHANNEL f2 -----  
SFO2 400.1916008 MHz  
NUC2 1H  
CPDPRG[2] waltz16

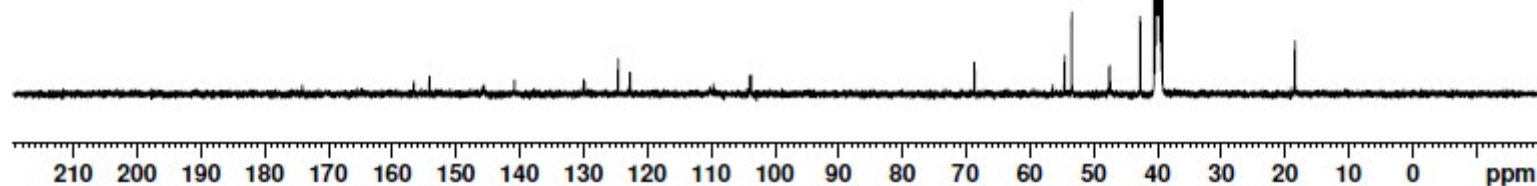



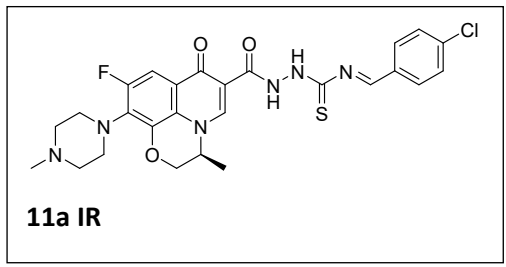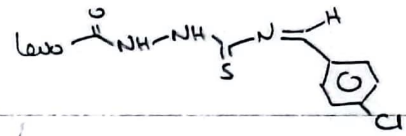

SHIMADZU

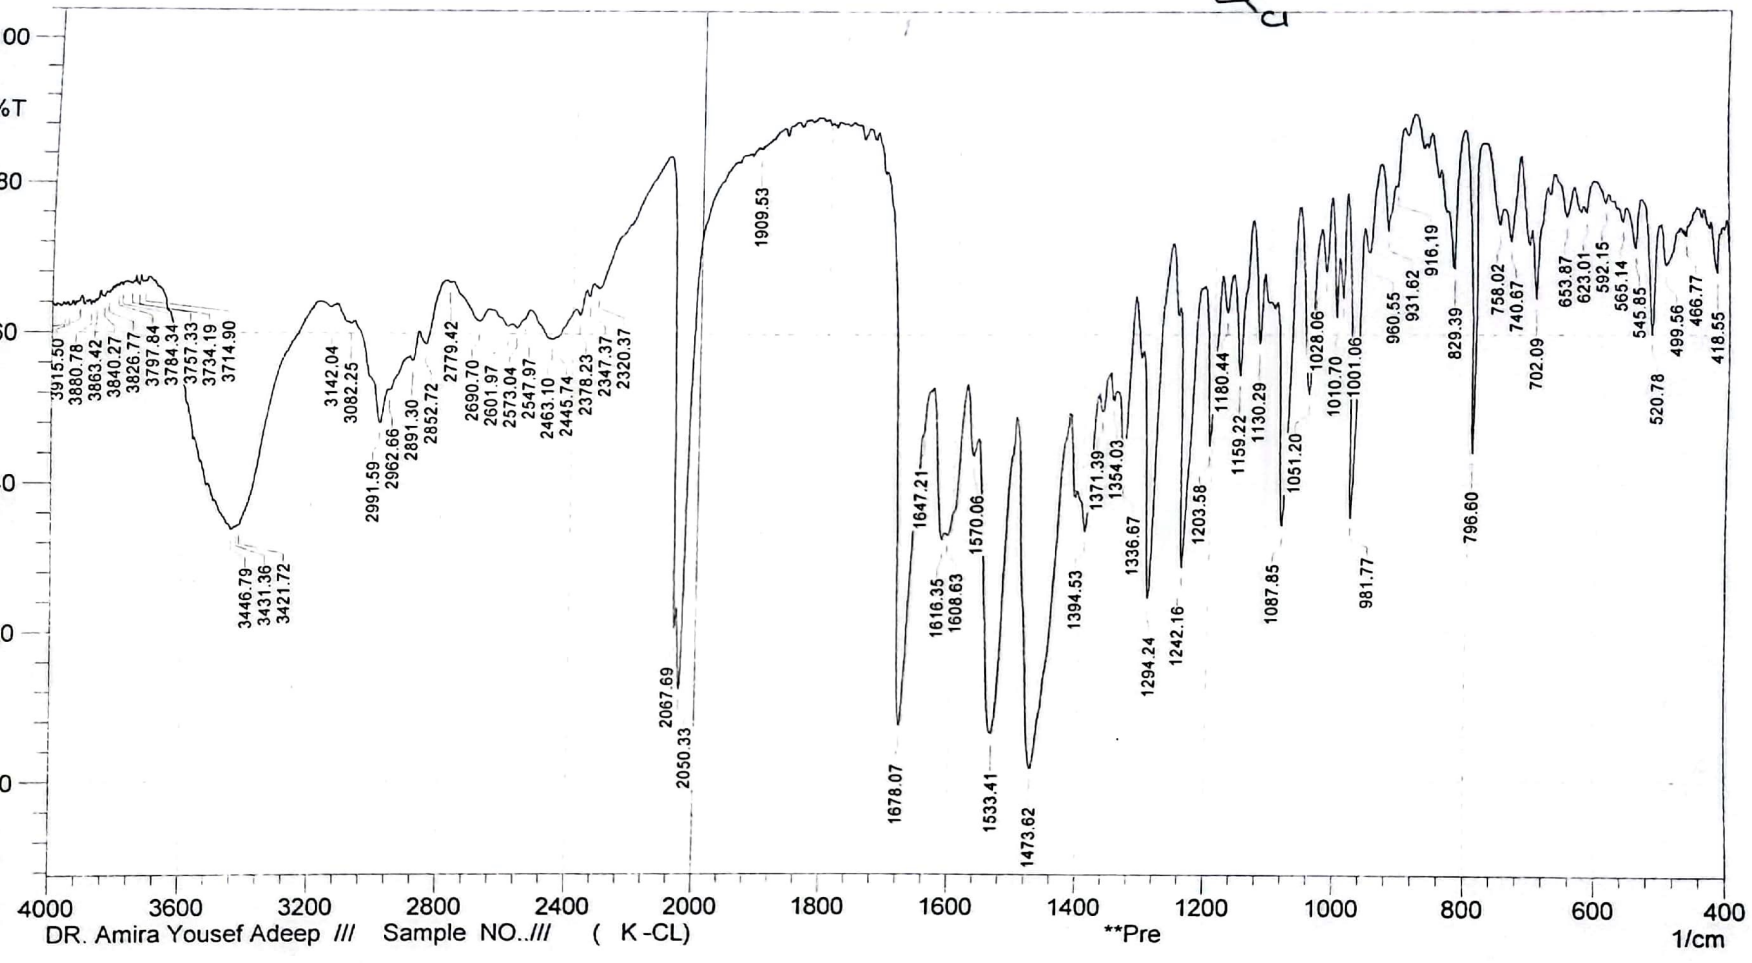

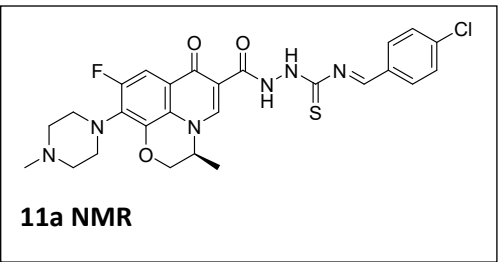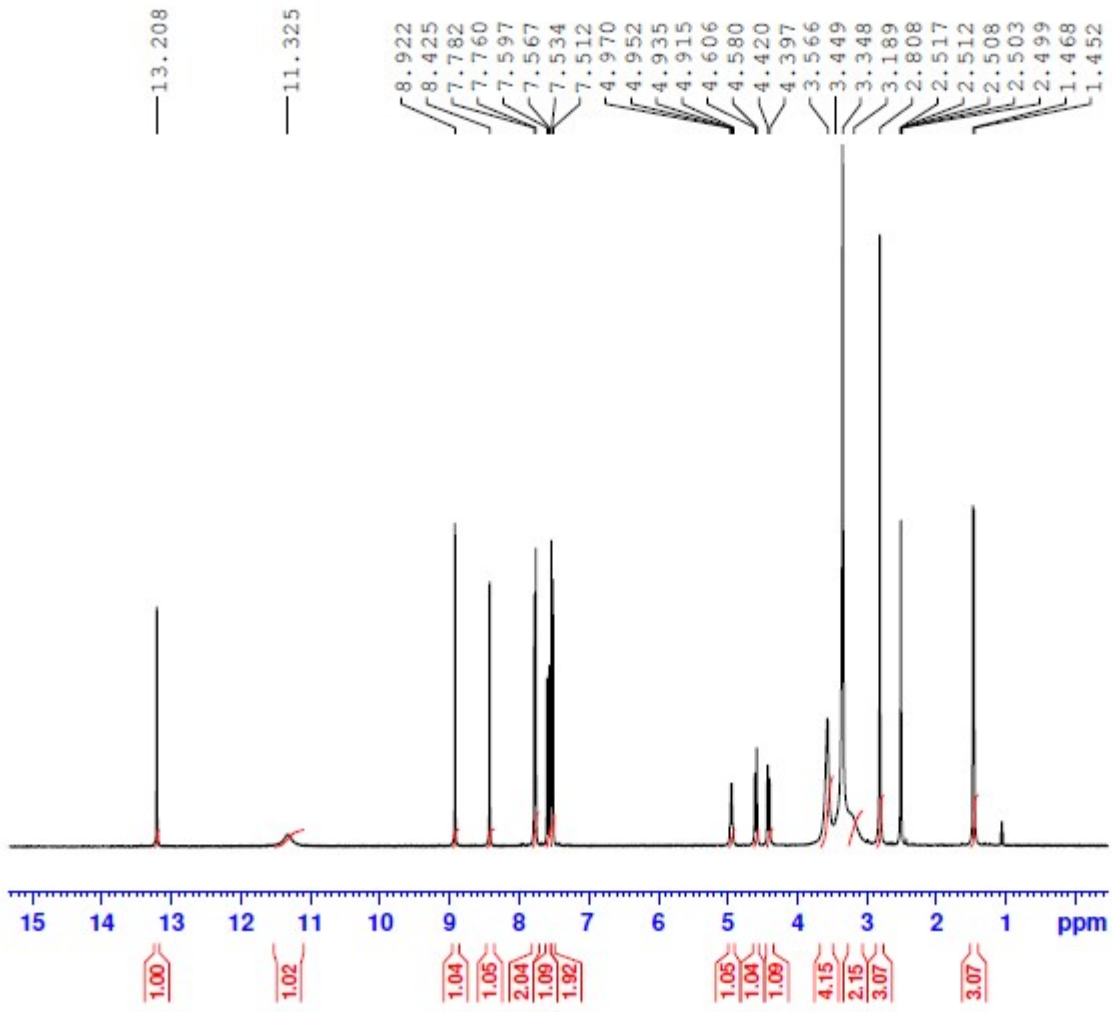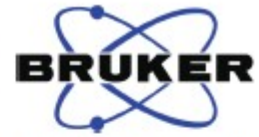

```

Current Data Parameters
NAME      amira-youssef-KCl
EXPNO     1
PROCNO    1

F2 - Acquisition Parameters
Date_     20220426
Time      10.21
INSTRUM   spect
PROBHD    5 mm PABBO BB/
PULPROG   zg30
TD         65536
SOLVENT   DMSO
NS         20
DS         2
SWH        8012.820 Hz
FIDRES     0.122266 Hz
AQ         4.0894465 sec
RG         205.37
DW         62.400 usec
DE         6.50 usec
TE         300.0 K
D1         1.00000000 sec
TD0        1

===== CHANNEL f1 =====
SFO1      400.1524711 MHz
NUC1       1H
P1         12.00 usec
PIW1       18.00000000 W

F2 - Processing parameters
SI         65536
SF         400.1500000 MHz
WDW        EM
SSB        0
LB         0.30 Hz
GB         0
PC         1.00
  
```

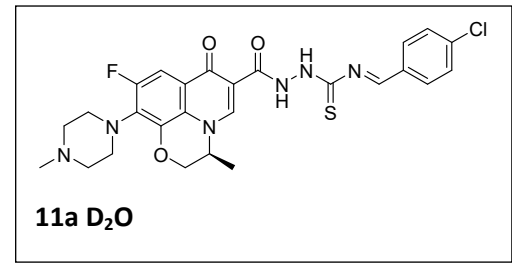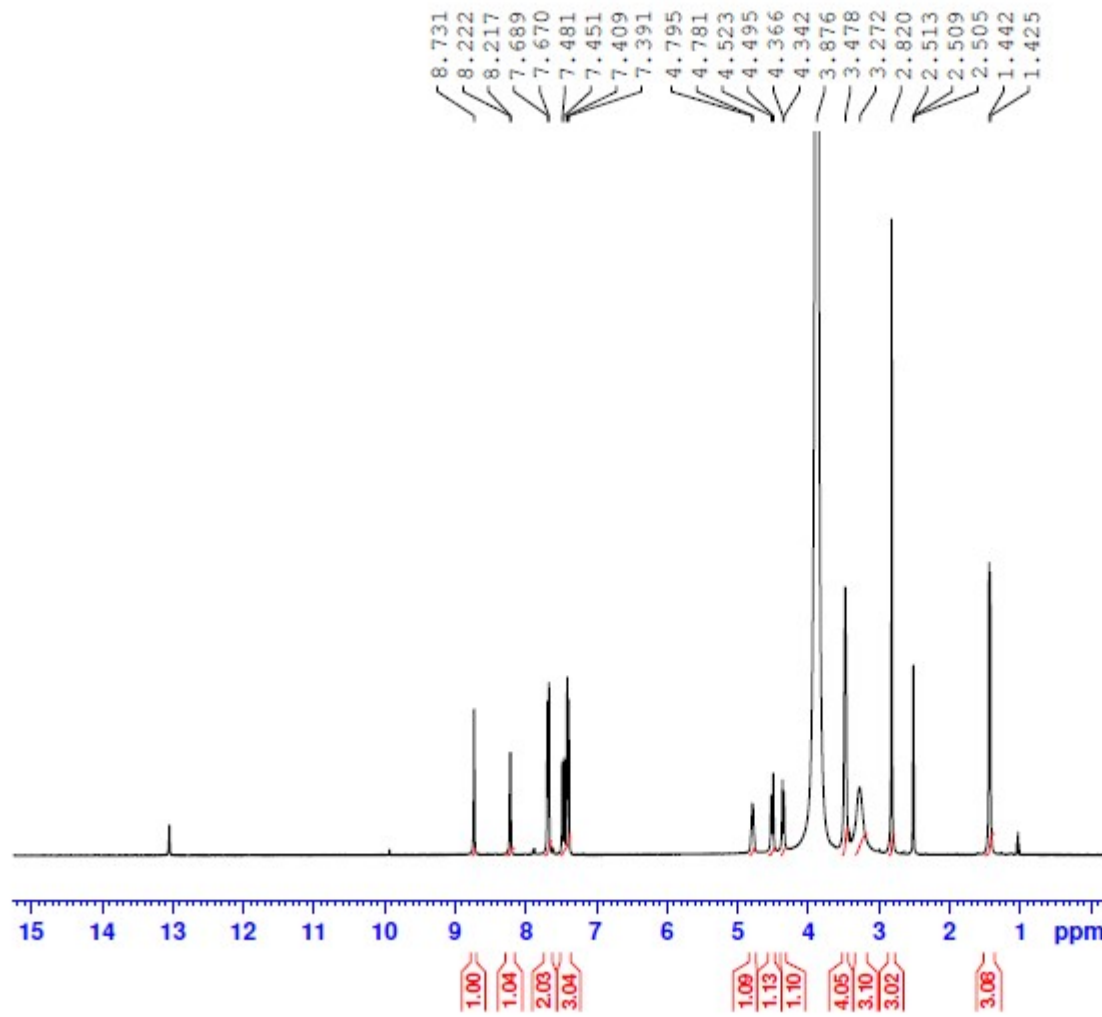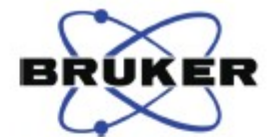

Current Data Parameters  
 NAME anira-youssef-KC1-d2o  
 EXPNO 1  
 PROCNO 1

F2 - Acquisition Parameters  
 Date\_ 20220606  
 Time 7.56  
 INSTRUM spect  
 PROBHD 5 mm PABBO BB/  
 PULPROG zg30  
 ID 65536  
 SOLVENT DMSO  
 NS 29  
 DS 2  
 SWH 8012.820 Hz  
 FIDRES 0.122266 Hz  
 AQ 4.0894465 sec  
 RG 164.32  
 DW 62.400 usec  
 DE 6.50 usec  
 TE 300.0 K  
 D1 1.00000000 sec  
 TDO 1

----- CHANNEL f1 -----  
 SFO1 400.1524711 MHz  
 NUC1 1H  
 P1 12.00 usec  
 PLW1 18.00000000 W

F2 - Processing parameters  
 SI 65536  
 SF 400.1500000 MHz  
 WDW EM  
 SSB 0  
 LB 0.30 Hz  
 GB 0  
 PC 1.00

amira-youssef-KCl.2.fid

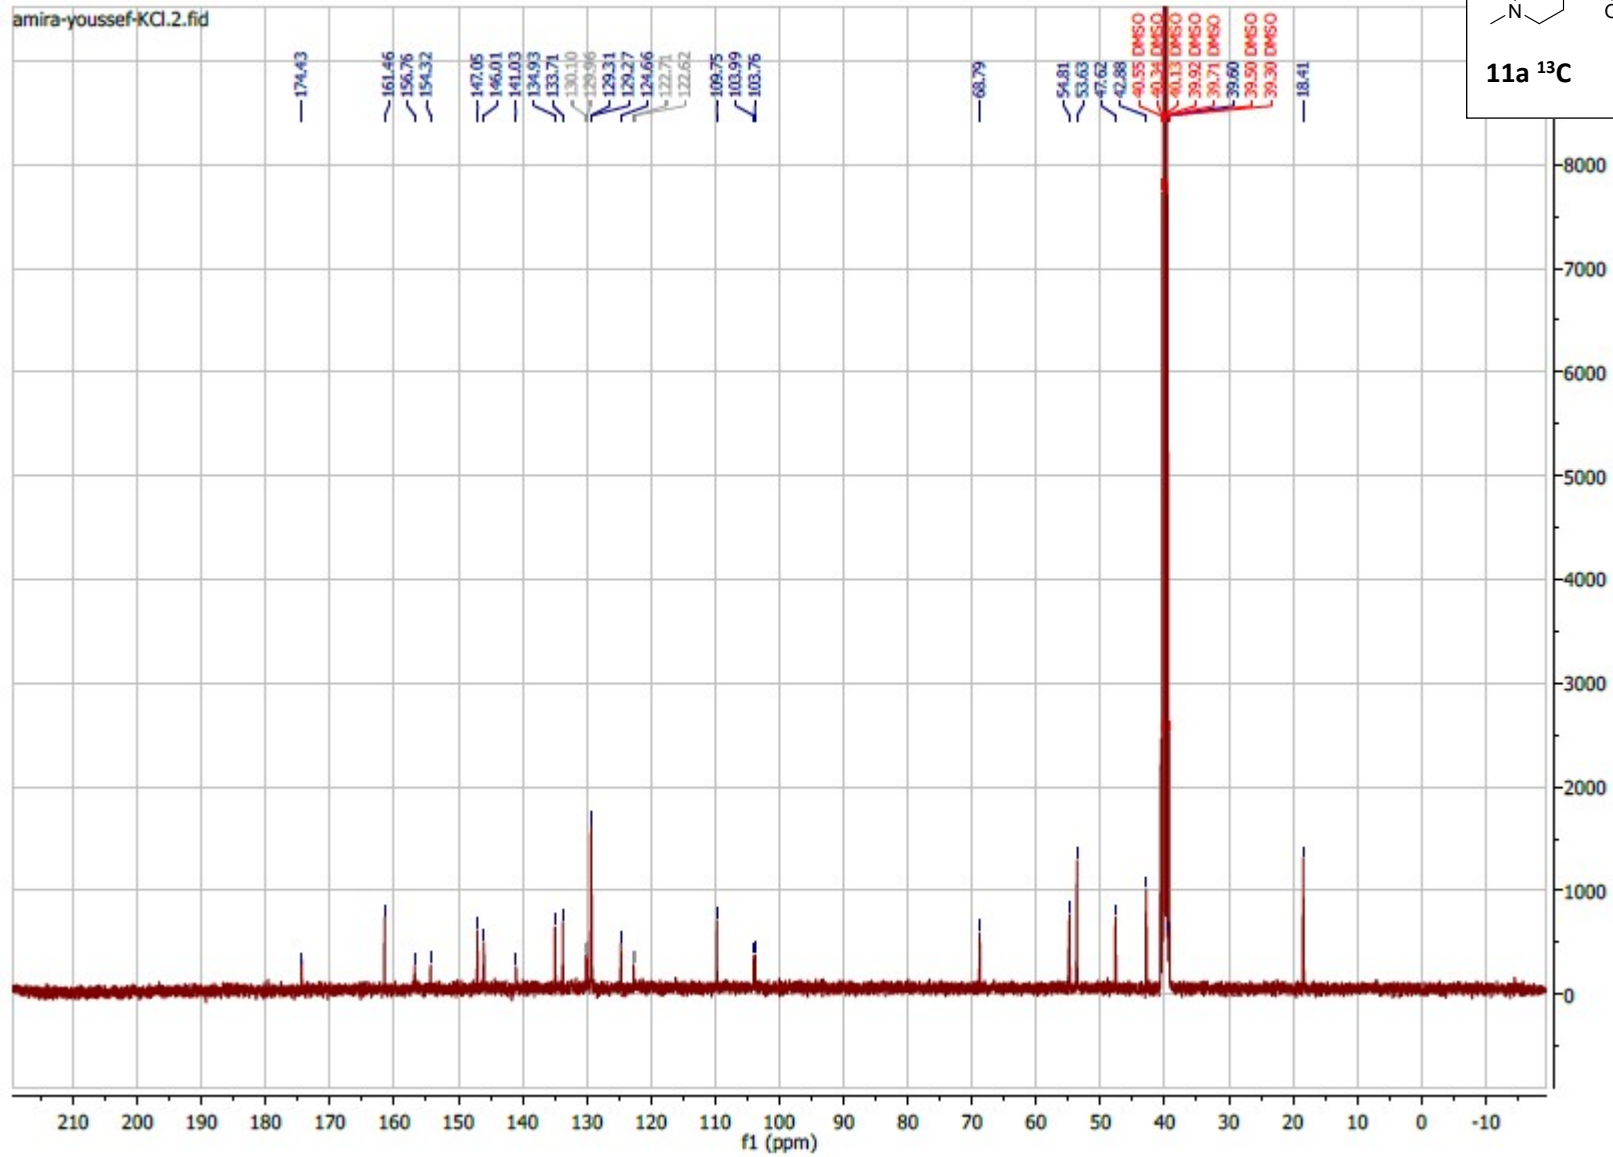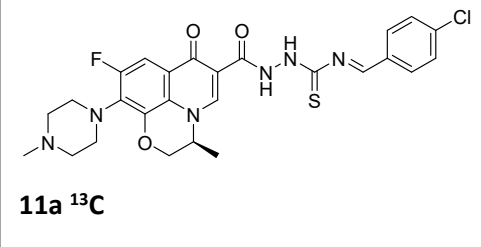

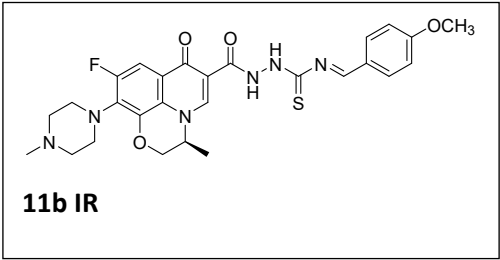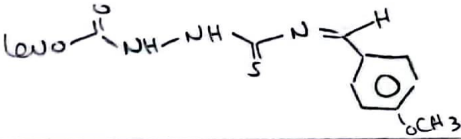

SHIMADZU

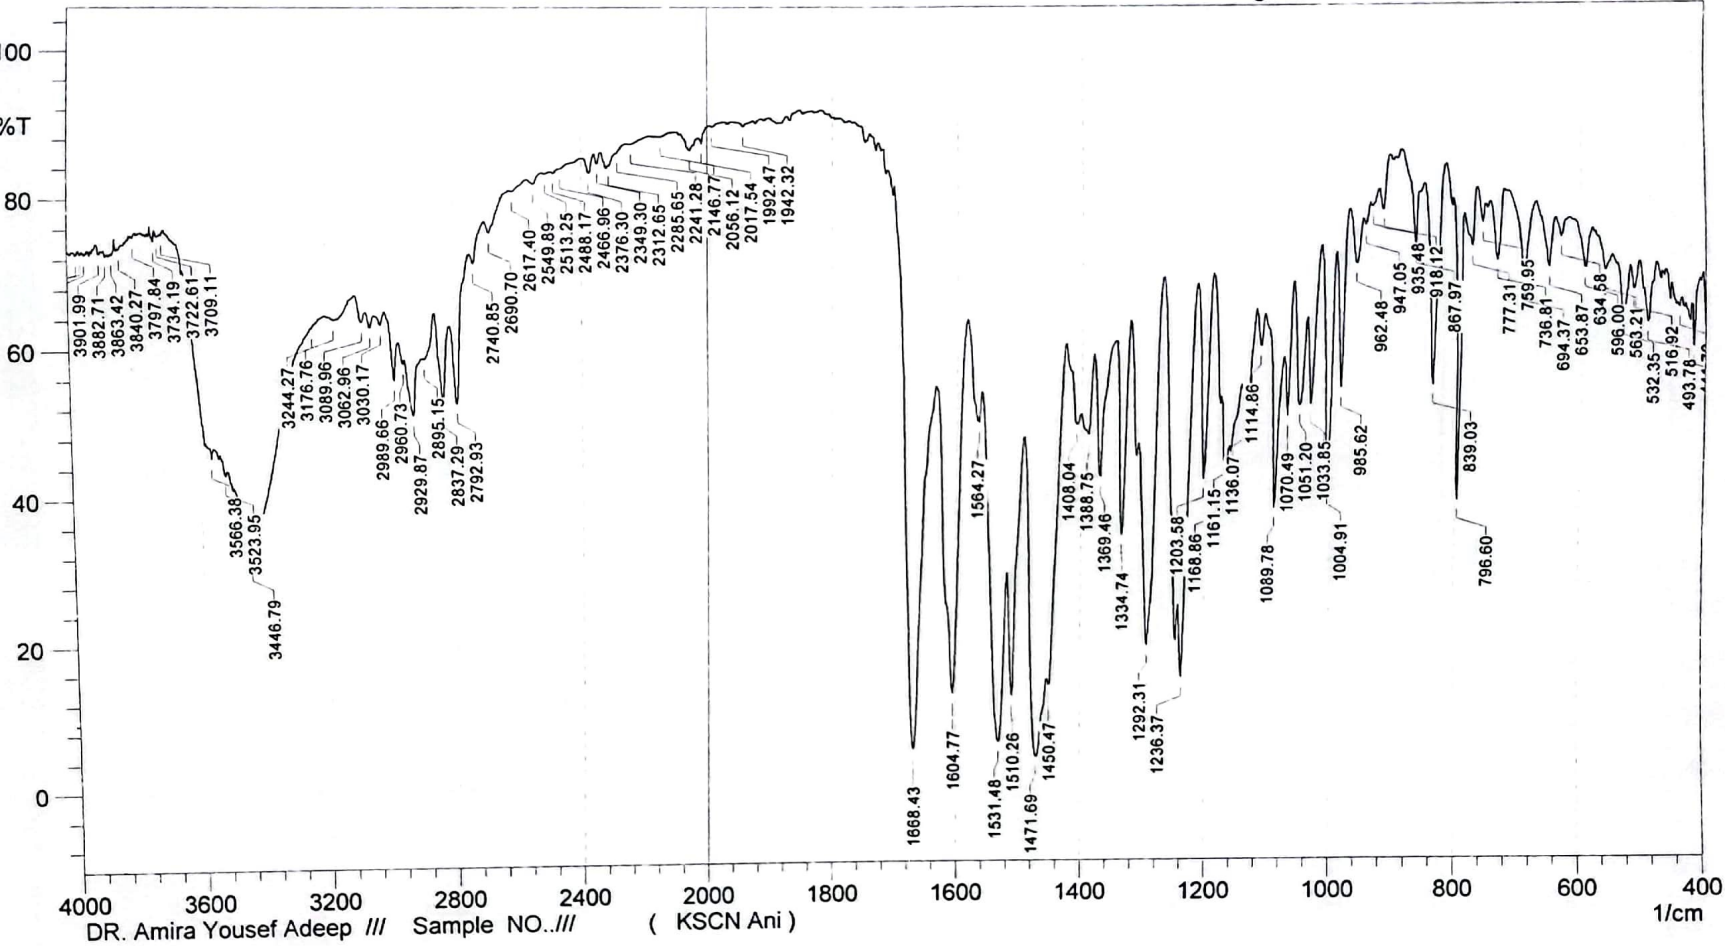

Comment:

Date/Time; 3/14/2022 12:40:49 PM

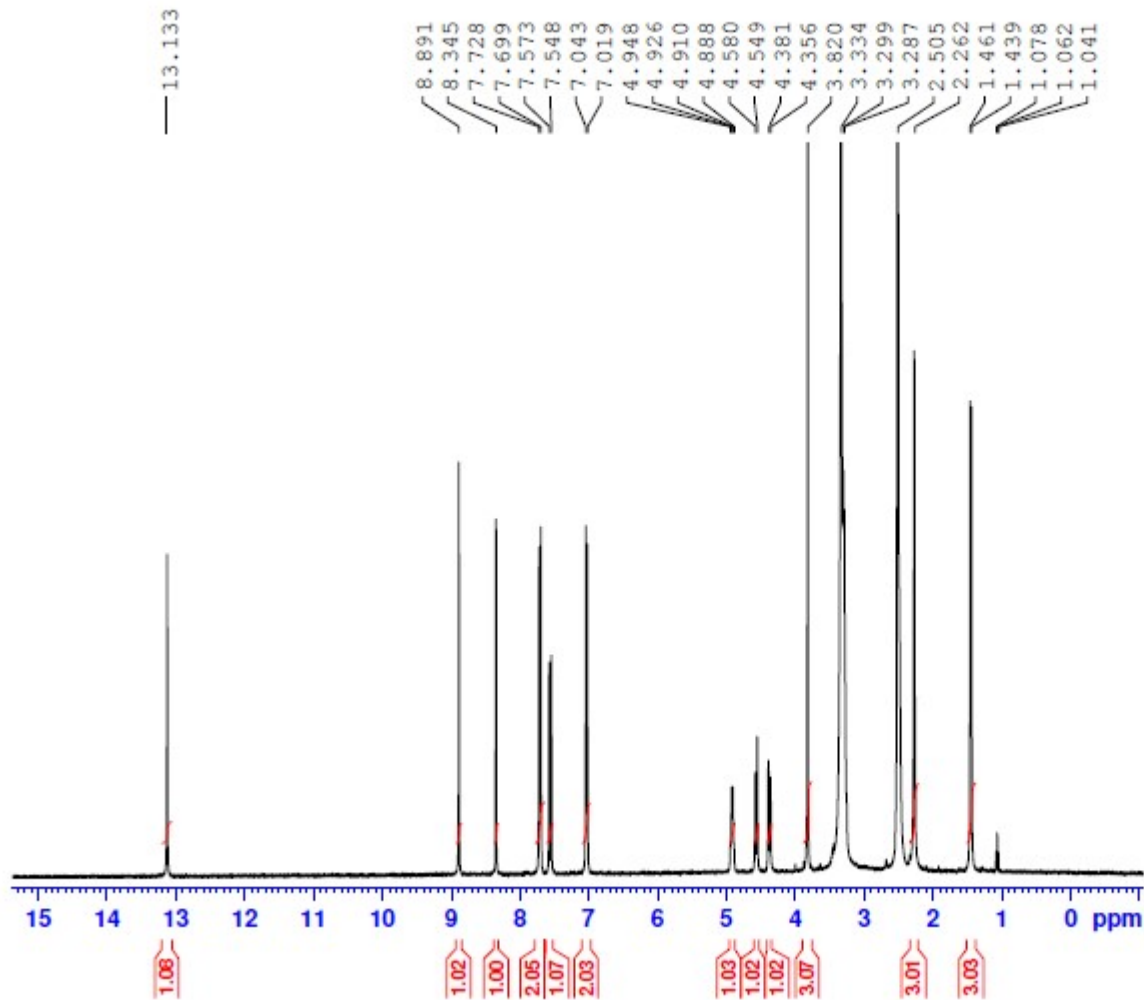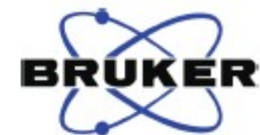

Current Data Parameters  
 NAME abdelrahman-ziada-K-Ani  
 EXPNO 1  
 PROCNO 1

F2 - Acquisition Parameters  
 Date\_ 20220228  
 Time 14.29  
 INSTRUM spect  
 PROBHD 5 mm PABBO BB/  
 PULPROG zg30  
 TD 65536  
 SOLVENT DMSO  
 NS 60  
 DS 2  
 SWH 8012.820 Hz  
 FIDRES 0.122266 Hz  
 AQ 4.0894465 sec  
 RG 205.37  
 DW 62.400 usec  
 DE 6.50 usec  
 TE 300.0 K  
 D1 1.00000000 sec  
 TDO 1

----- CHANNEL f1 -----  
 SFO1 400.1524711 MHz  
 NUC1 1H  
 P1 12.00 usec  
 PLW1 18.00000000 W

F2 - Processing parameters  
 SI 65536  
 SF 400.1500000 MHz  
 WDW EM  
 SSB 0  
 LB 0.30 Hz  
 GB 0  
 PC 1.00

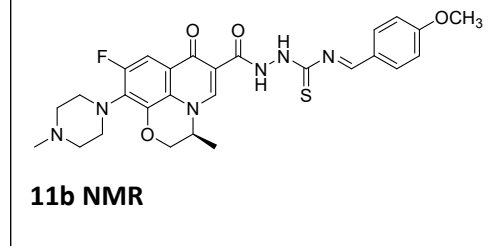



—13.052

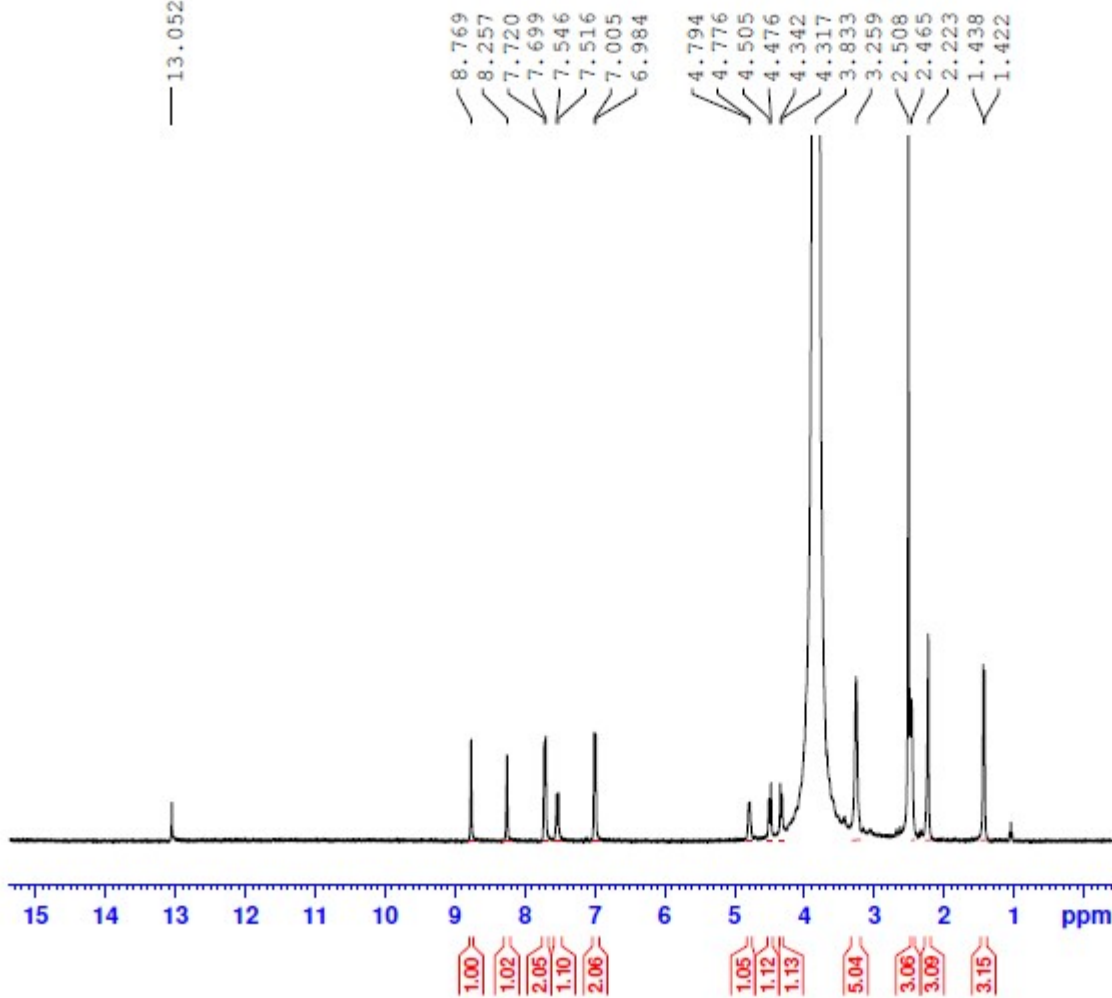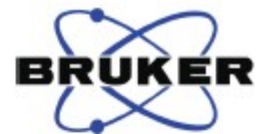

Current Data Parameters  
NAME amira-youssef-K-Ani-d2o  
EXPNO 1  
PROCNO 1

F2 - Acquisition Parameters  
Date\_ 20220324  
Time 9.08  
INSTRUM spect  
PROBHD 5 mm PABBO BB/  
PULPROG zg30  
ID 65536  
SOLVENT DMSO  
NS 68  
DS 2  
SWH 8012.820 Hz  
FIDRES 0.122266 Hz  
AQ 4.0894465 sec  
RG 126.31  
DW 62.400 usec  
DE 6.50 usec  
TE 300.0 K  
D1 1.00000000 sec  
TDO 1

----- CHANNEL f1 -----  
SFO1 400.1524711 MHz  
NUC1 1H  
P1 12.00 usec  
PLW1 18.00000000 W

F2 - Processing parameters  
SI 65536  
SF 400.1500000 MHz  
WDW EM  
SSB 0  
LB 0.30 Hz  
GB 0  
PC 1.00

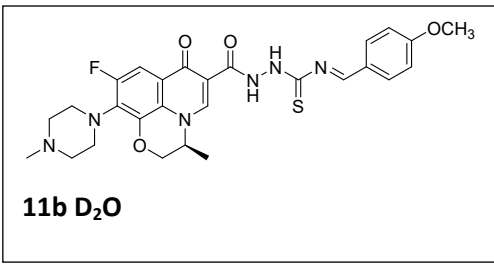



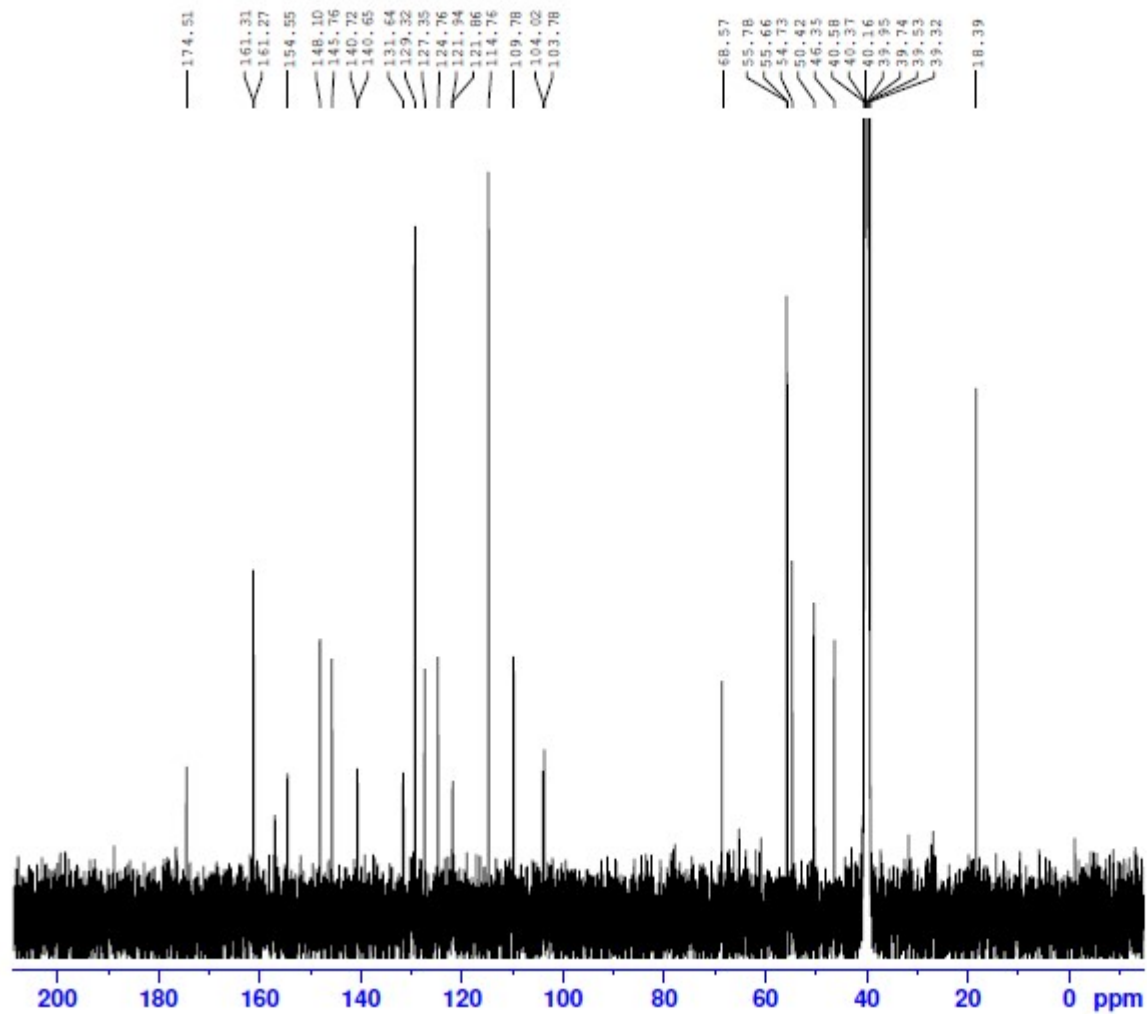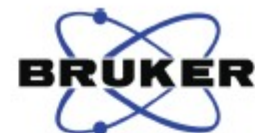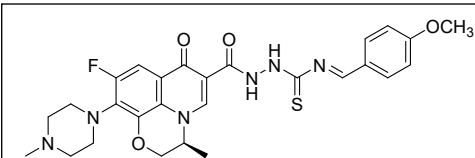

11b <sup>13</sup>C

Current Data Parameters  
 NAME amira-youssef-kiani  
 EXPNO 2  
 PROCNO 1

F2 - Acquisition Parameters  
 Date\_ 20220801  
 Time 7.54  
 INSTRUM spect  
 PROBHD 5 mm PABBO BB/  
 PULPROG zgpg30  
 TD 65536  
 SOLVENT DMSO  
 NS 14823  
 DS 4  
 SWH 24038.461 Hz  
 FIDRES 0.366798 Hz  
 AQ 1.3631488 sec  
 RG 205.37  
 DW 20.800 usec  
 DE 6.50 usec  
 TE 300.0 K  
 D1 2.00000000 sec  
 D11 0.03000000 sec  
 TD0 1

==== CHANNEL f1 =====  
 SFO1 100.6278588 MHz  
 NUC1 13C  
 P1 10.00 usec  
 PLW1 47.00000000 W

==== CHANNEL f2 =====  
 SFO2 400.1516006 MHz  
 NUC2 1H  
 CPDPRG[2] waltz16  
 PCPD2 90.00 usec  
 PLW2 18.00000000 W  
 PLW12 0.34722000 W  
 PLW13 0.28125000 W

F2 - Processing parameters  
 SI 32768  
 SF 100.6177975 MHz  
 WDW EM  
 SSB 0  
 LB 1.00 Hz  
 GB 0  
 PC 1.40

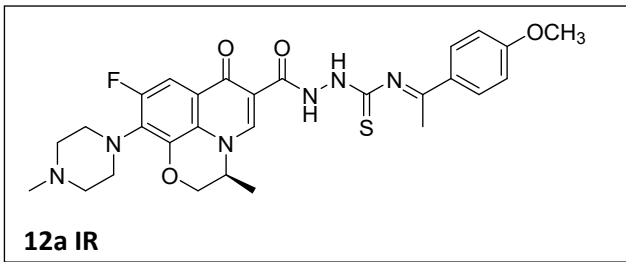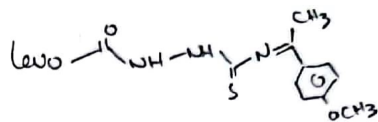

SHIMADZU

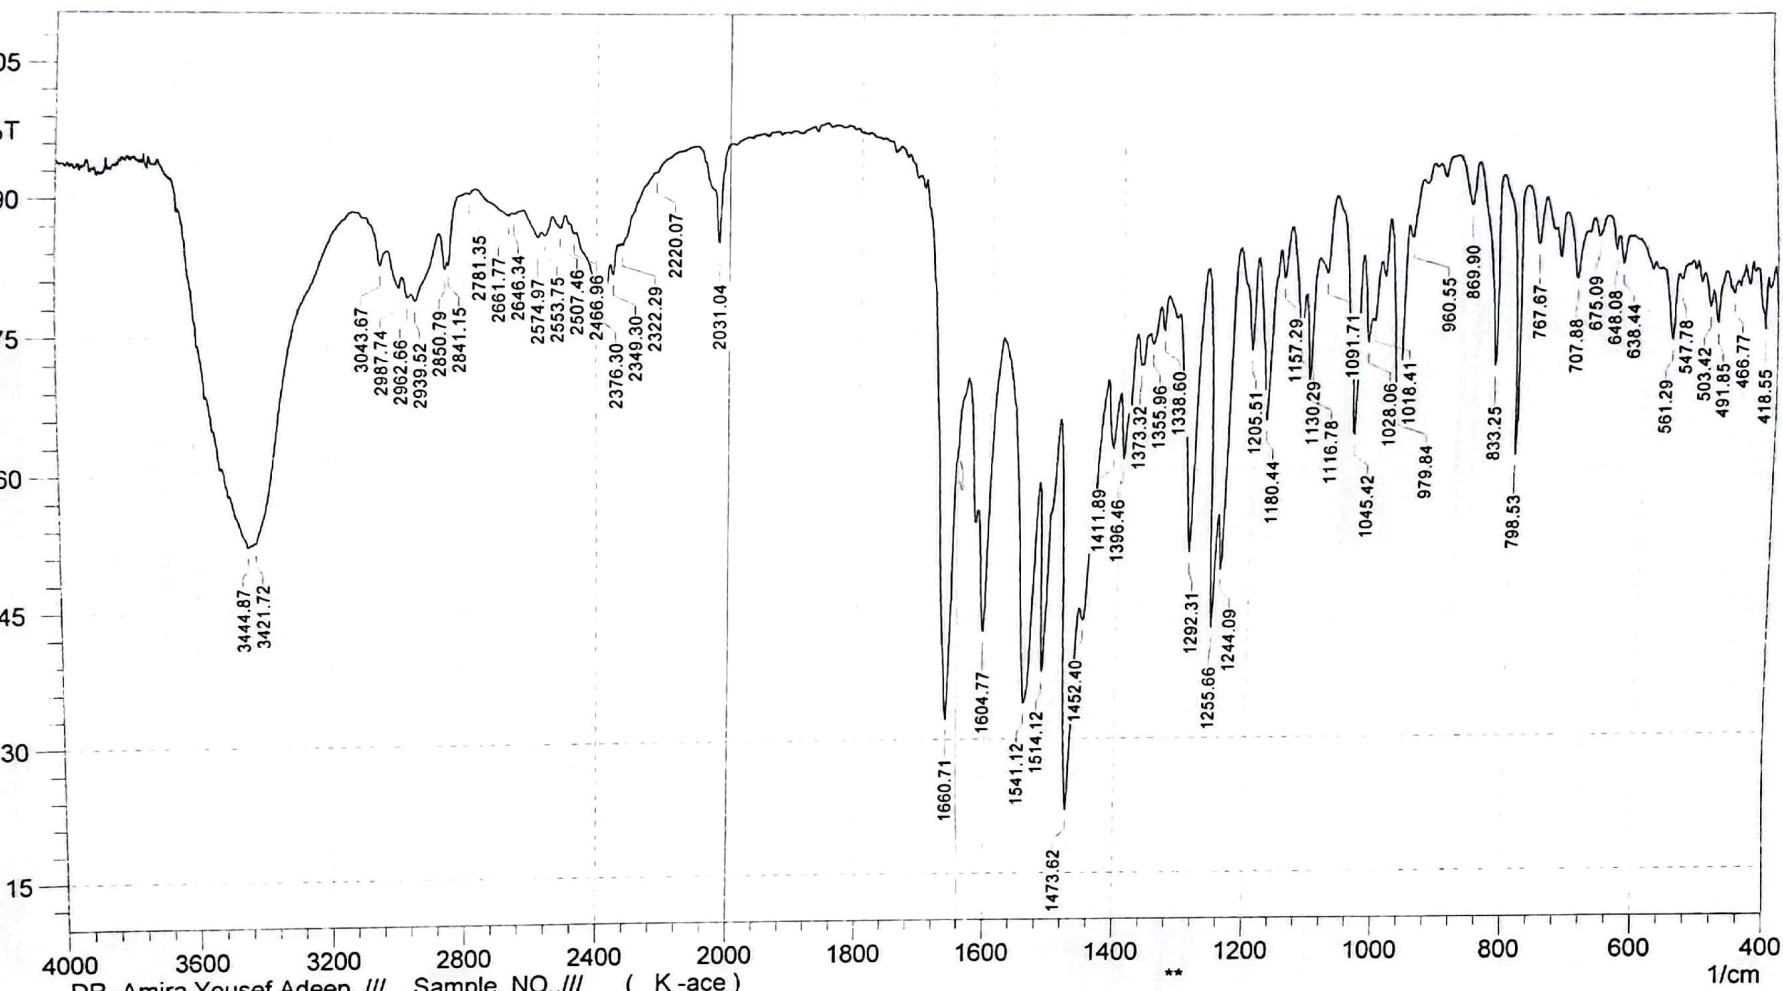

—13.108

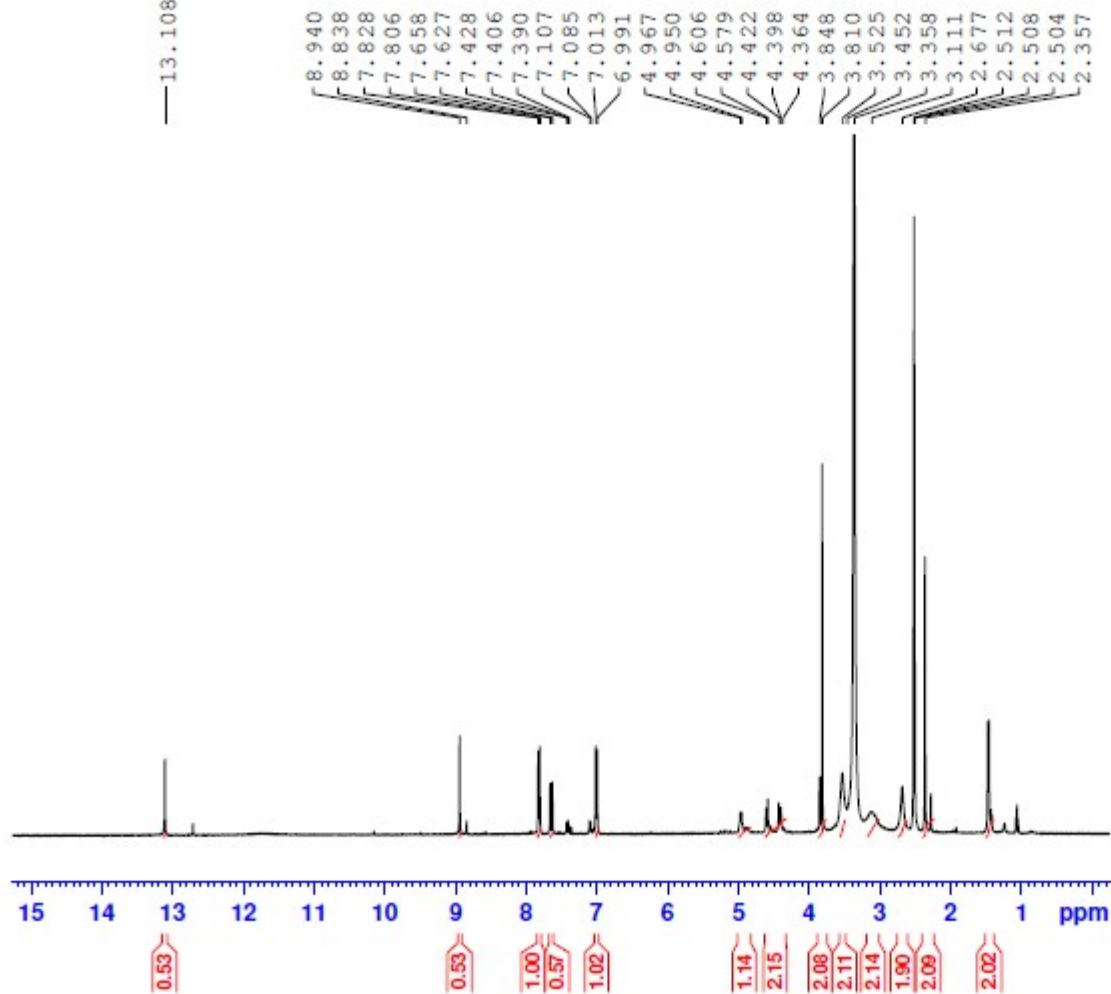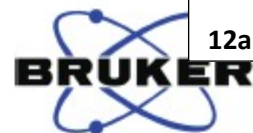

12a NMR

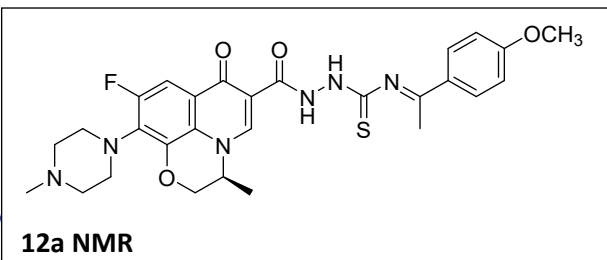

Current Data Parameters  
NAME amira-youssef-K-acc  
EXPNO 1  
PROCNO 1

F2 - Acquisition Parameters  
Data\_ 20220426  
Time 10.49  
INSTRUM spect  
PROBHD 5 mm PABBO BB/  
PULPROG zg30  
ID 65536  
SOLVENT DMSO  
NS 102  
DS 2  
SWH 8012.820 Hz  
FIDRES 0.122266 Hz  
AQ 4.0894465 sec  
RG 205.37  
DW 62.400 usec  
DE 6.50 usec  
TE 300.0 K  
D1 1.0000000 sec  
TD0 1

==== CHANNEL f1 =====  
SFO1 400.1524711 MHz  
NUC1 1H  
P1 12.00 usec  
PIW1 18.00000000 W

F2 - Processing parameters  
SI 65536  
SF 400.1500000 MHz  
WDW EM  
SSB 0  
LB 0.30 Hz  
GB 0  
PC 1.00

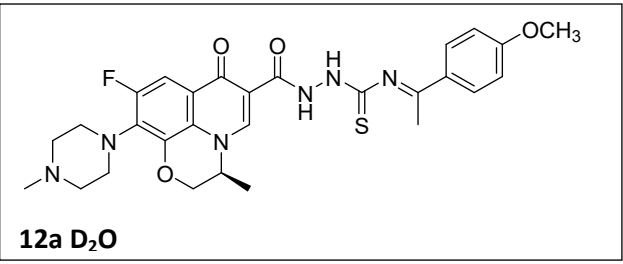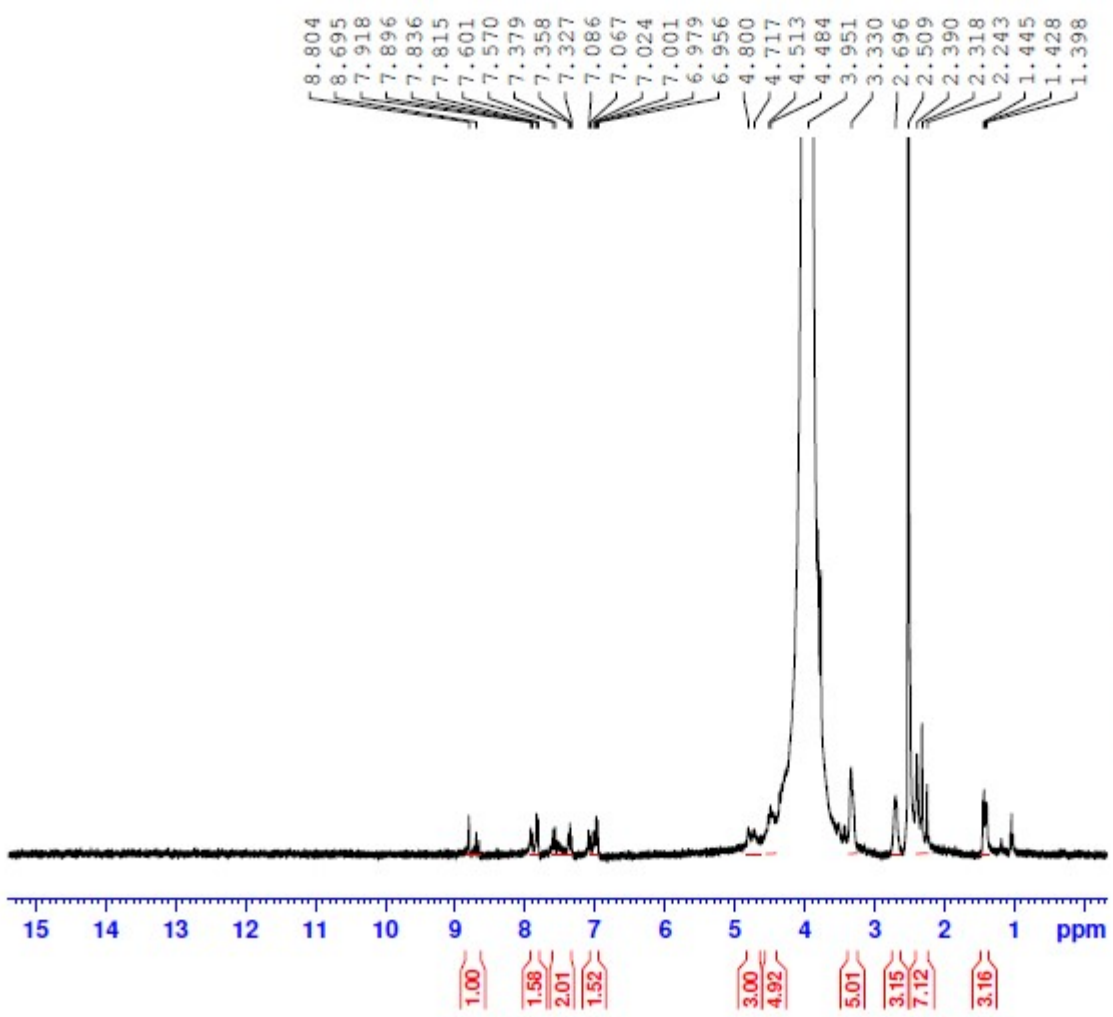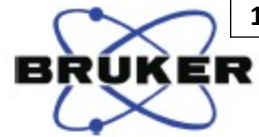

Current Data Parameters  
 NAME amira-youssef-K-acn-d2o  
 EXPNO 1  
 PROCNO 1

F2 - Acquisition Parameters  
 Date\_ 20220606  
 Time 7.48  
 INSTRUM spect  
 PROSHD 5 mm VASBO BB/  
 PULPROG zg30  
 TD 65536  
 SOLVENT DMSO  
 NS 52  
 DS 2  
 SWH 8012.820 Hz  
 FIDRES 0.122266 Hz  
 AQ 4.0894465 sec  
 RG 205.37  
 DW 62.400 usec  
 DE 6.50 usec  
 TE 300.0 K  
 D1 1.00000000 sec  
 TDO 1

----- CHANNEL f1 -----  
 SF01 400.1524711 MHz  
 NUC1 1H  
 P1 12.00 usec  
 PLW1 18.00000000 W

F2 - Processing parameters  
 SI 65536  
 SF 400.1500000 MHz  
 WDW EM  
 SSB 0  
 LB 0.30 Hz  
 GB 0  
 PC 1.00

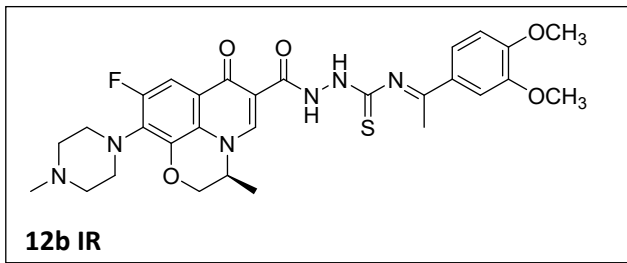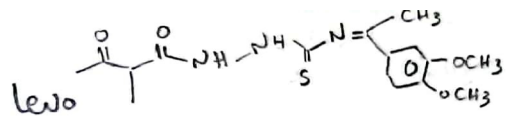

mp = 222-224 °C

SHIMADZU

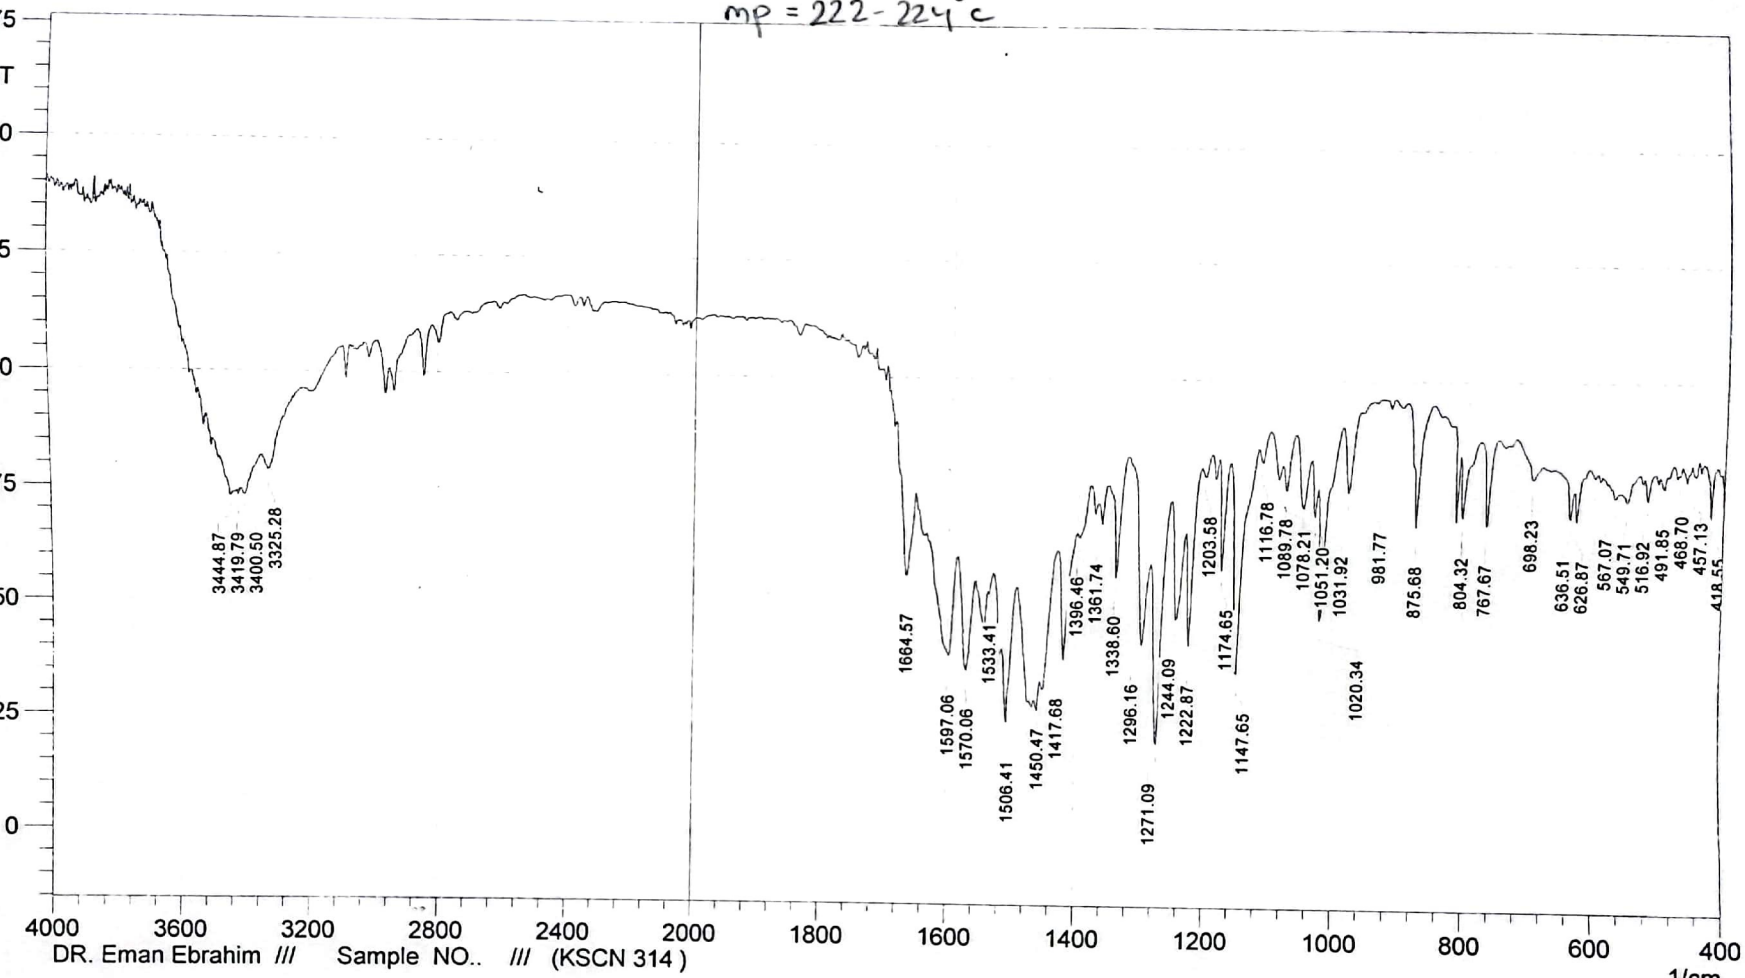

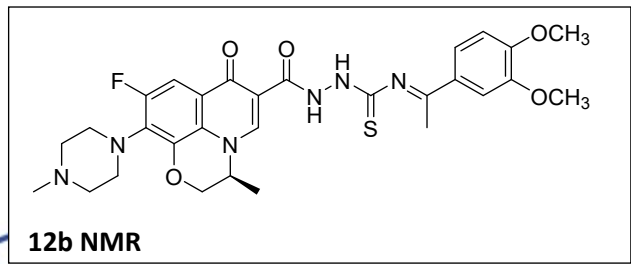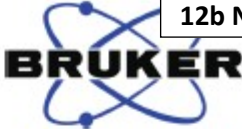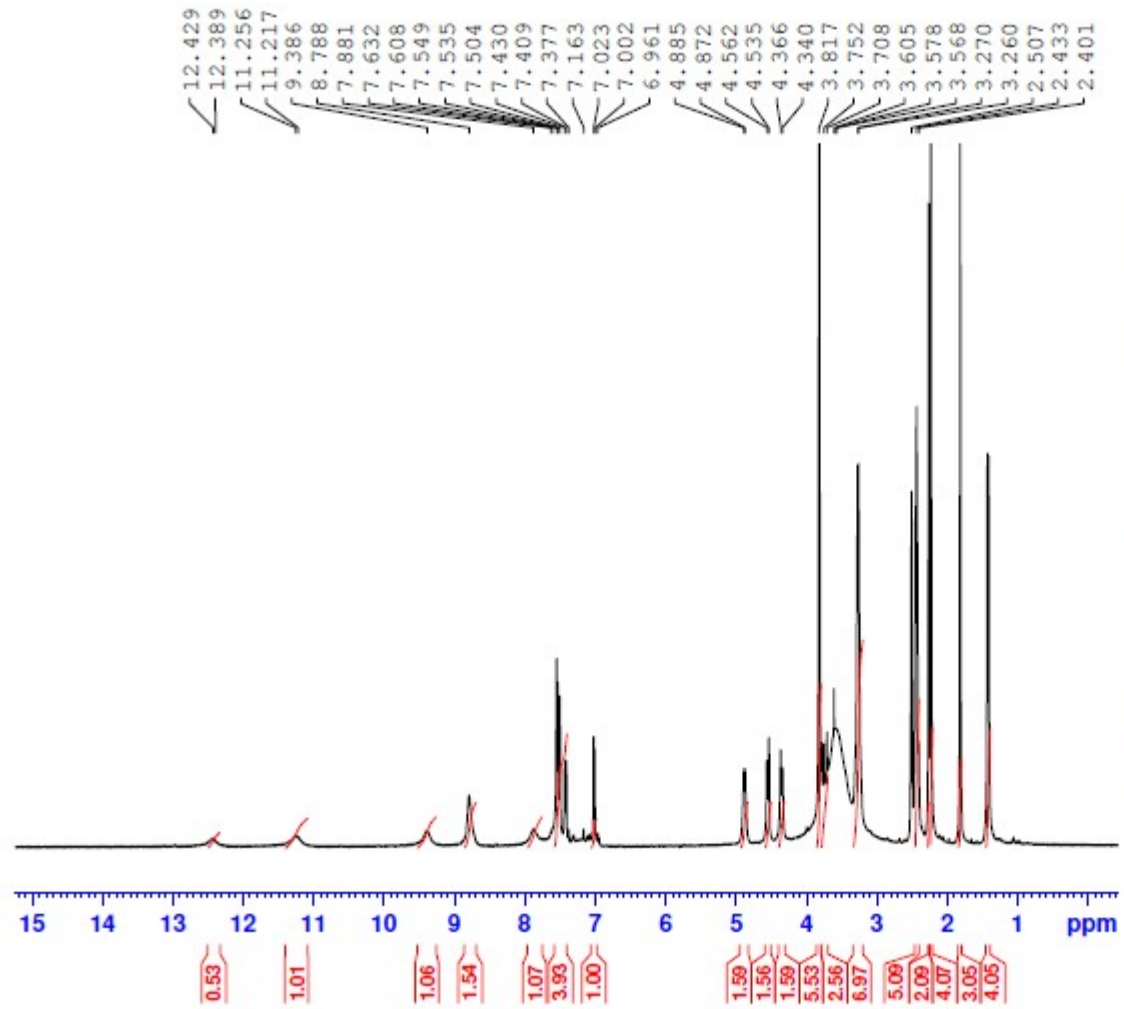

```

Current Data Parameters
NAME      amira-youssef-KSCN
EXPNO     1
PROCNO    1

F2 - Acquisition Parameters
Date_     20211125
Time      14.46
INSTRUM   spect
PROBHD    5 mm PABBO BB/
PULPROG   zg30
TD         65536
SOLVENT   DMSO
NS         40
DS         2
SWH        8012.820 Hz
FIDRES     0.122266 Hz
AQ         4.0894465 sec
RG         205.37
DW         62.400 usec
DE         6.50 usec
TE         300.0 K
D1         1.00000000 sec
TD0        1

===== CHANNEL f1 =====
SFO1      400.1524711 MHz
NUC1       1H
P1         12.00 usec
PLW1      18.00000000 W

F2 - Processing parameters
SI         65536
SF         400.1500000 MHz
WDW        EM
SSB        0
LB         0.30 Hz
GB         0
PC         1.00
  
```



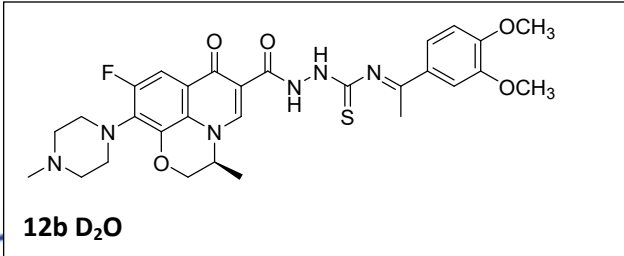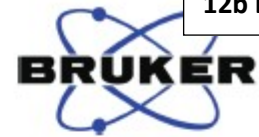

```

Current Data Parameters
NAME      amira-youssef-KSCN-d2o
EXPNO     1
PROCNO    1

F2 - Acquisition Parameters
Date_     20211212
Time      16.02
INSTRUM   spect
PROBHD    5 mm PABBO BB/
PULPROG   zg30
ID        65536
SOLVENT   DMSO
NS         58
DS         2
SWH        8012.820 Hz
FIDRES     0.122266 Hz
AQ         4.0894465 sec
RG         31.47
EW         62.400 usec
DE         6.50 usec
TE         300.0 K
D1         1.00000000 sec
TDO        1

----- CHANNEL f1 -----
SFO1      400.1524711 MHz
NUC1       1H
P1         12.00 usec
PLW1       18.00000000 W

F2 - Processing parameters
SI         65536
SF         400.1500000 MHz
WDW        EM
SSB        0
LB         0.30 Hz
GB         0
PC         1.00
  
```

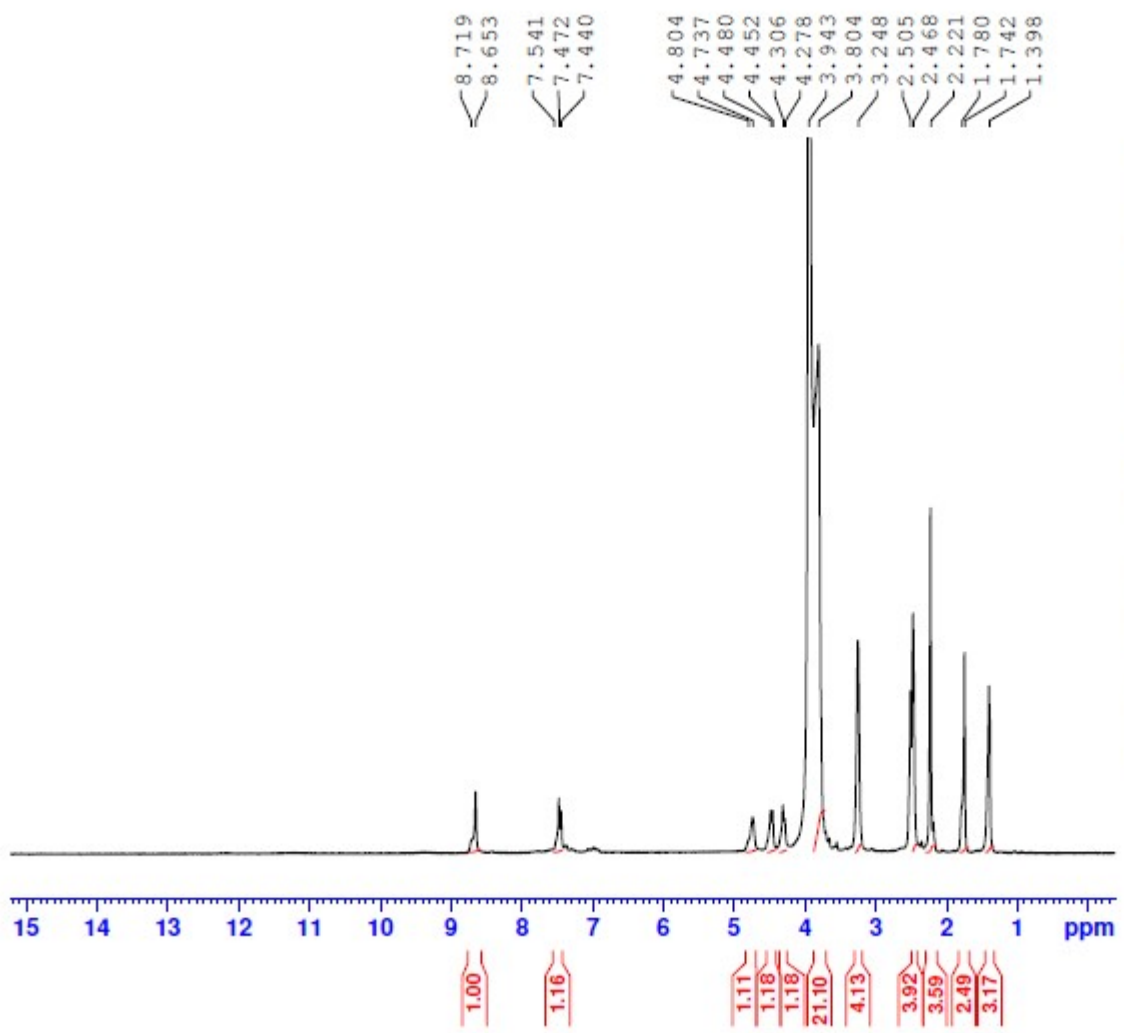



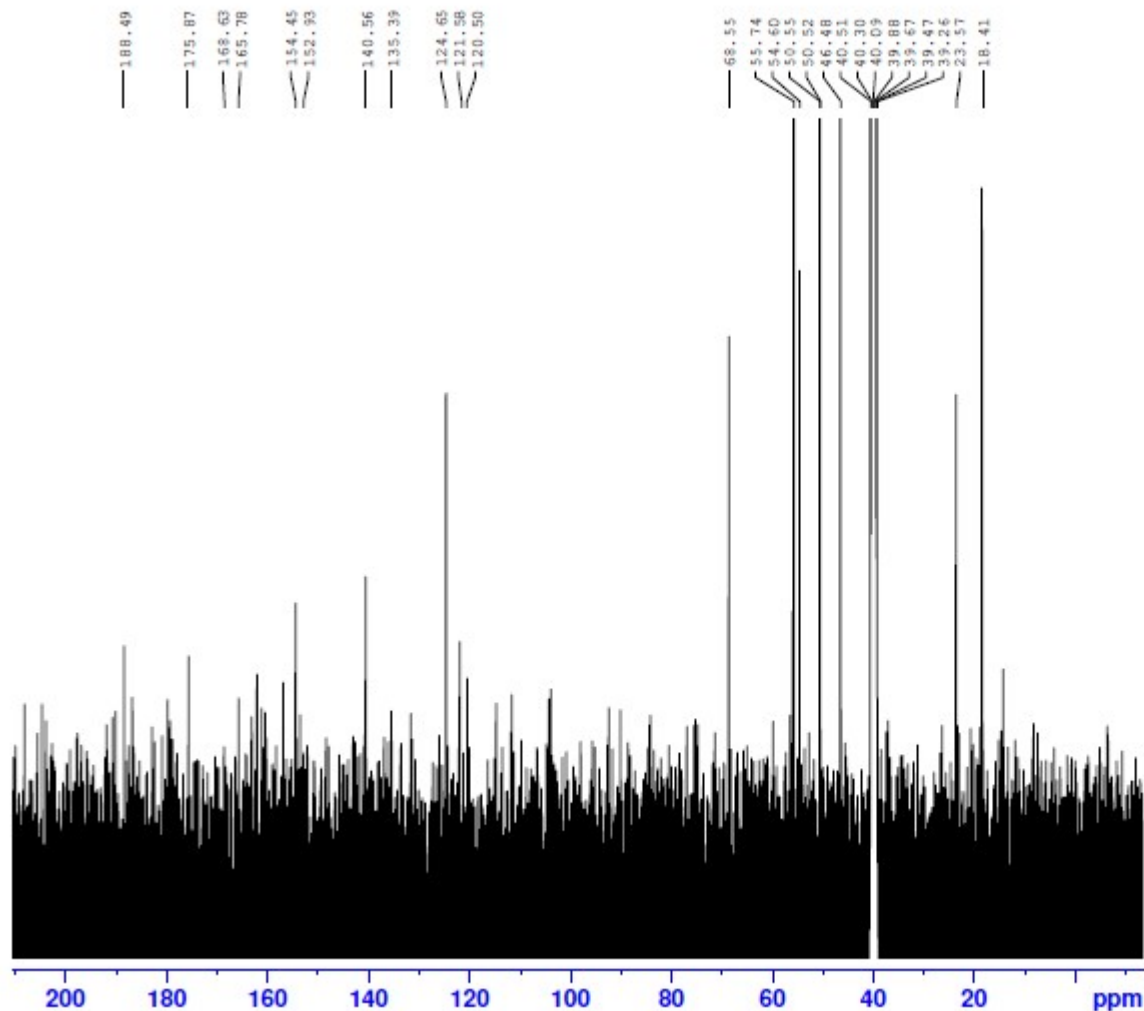

12b <sup>13</sup>C

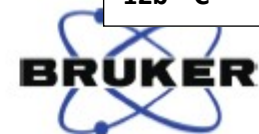

```

Current Data Parameters
NAME      amira-youssef-KSCN
EXPNO     2
PROCNO    1

F2 - Acquisition Parameters
Date_     20211212
Time      15.52
INSTRUM   spect
PROBHD    5 mm PABBO BB/
PULPROG   zgpg30
ID         65536
SOLVENT   DMSO
NS         2000
DS         4
SWH       24038.461 Hz
FIDRES    0.366798 Hz
AQ         1.3631488 sec
RG         205.37
DW         20.800 usec
DE         6.50 usec
TE         300.0 K
D1         2.00000000 sec
D11        0.03000000 sec
TD0        1

===== CHANNEL f1 =====
SFO1      100.6278588 MHz
NUC1       13C
P1         10.00 usec
PLW1       47.00000000 W

===== CHANNEL f2 =====
SFO2      400.1516006 MHz
NUC2       1H
CFDPRG[2] waltz16
PCPD2      90.00 usec
PLW2       18.00000000 W
PLW12      0.34722000 W
PLW13      0.28125000 W

F2 - Processing parameters
SI         32768
SF         100.6177975 MHz
WDW        EM
SSB        0
LB         1.00 Hz
GB         0
PC         1.40
  
```

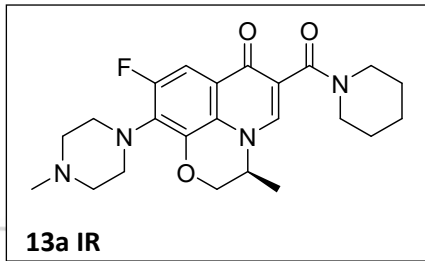

SHIMADZU

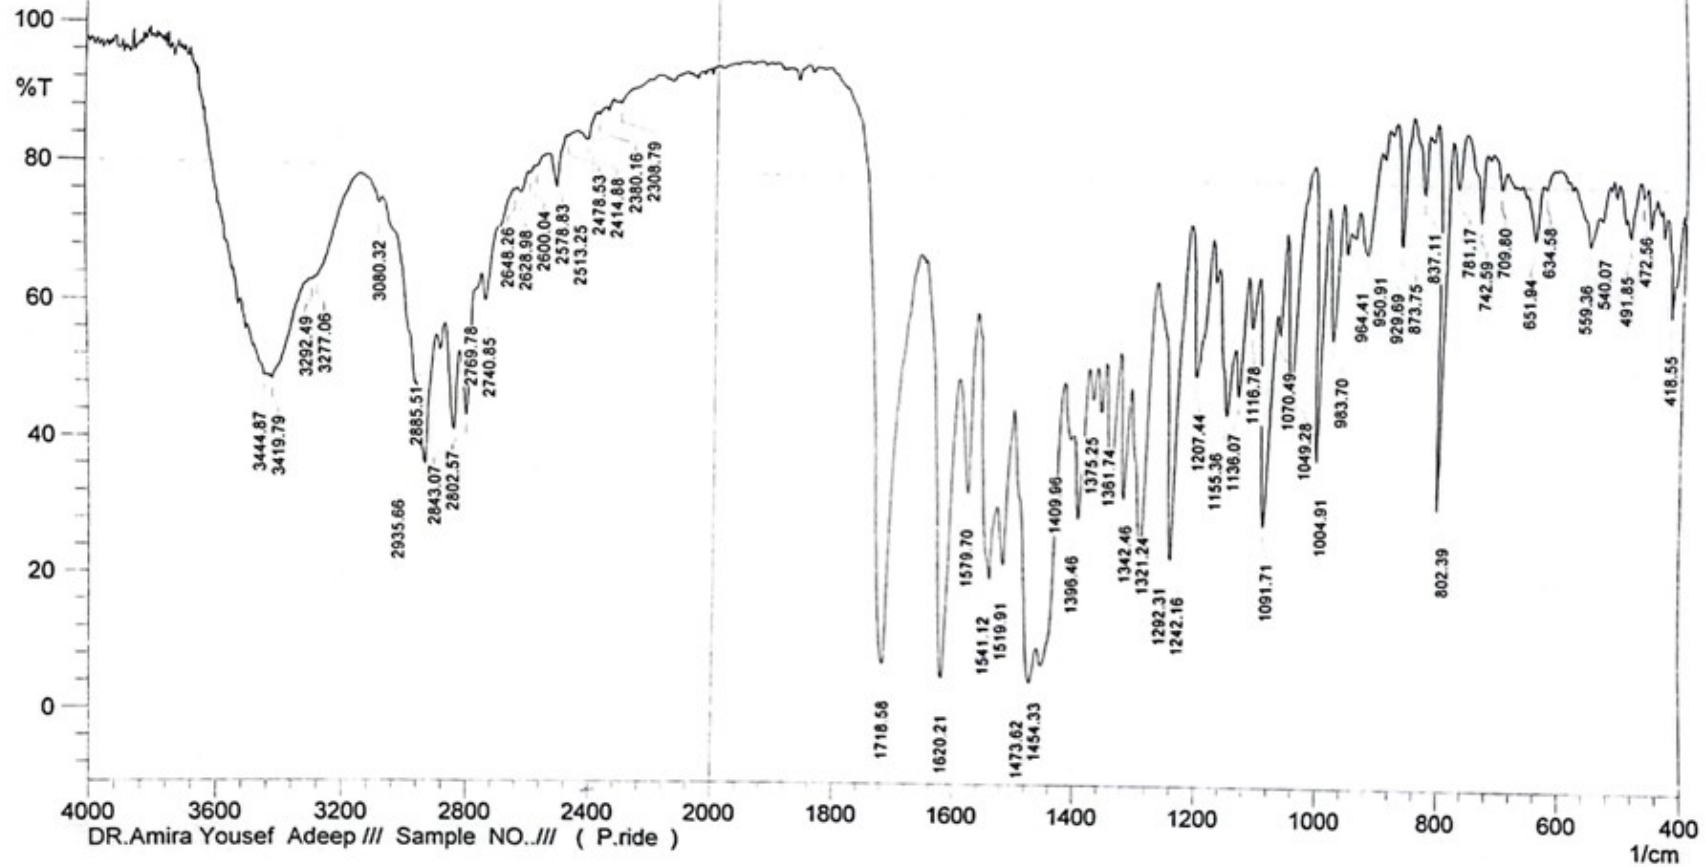

Comment;  
 DR.Amira Yousef Adeep /// Sample NO./// ( P.ride )  
 )  
 \*\*Prepared By : Dr.Ahmed A.EL-Wakeel , Ph.D.

Date/Time; 10/4/2022 11:45:12 AM  
 No. of Scans; 10  
 Resolution; 4 [1/cm]  
 Apodization; Happ-Genzel  
 User; Heinrich

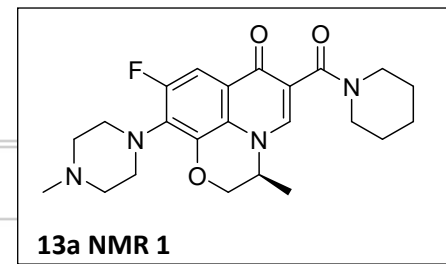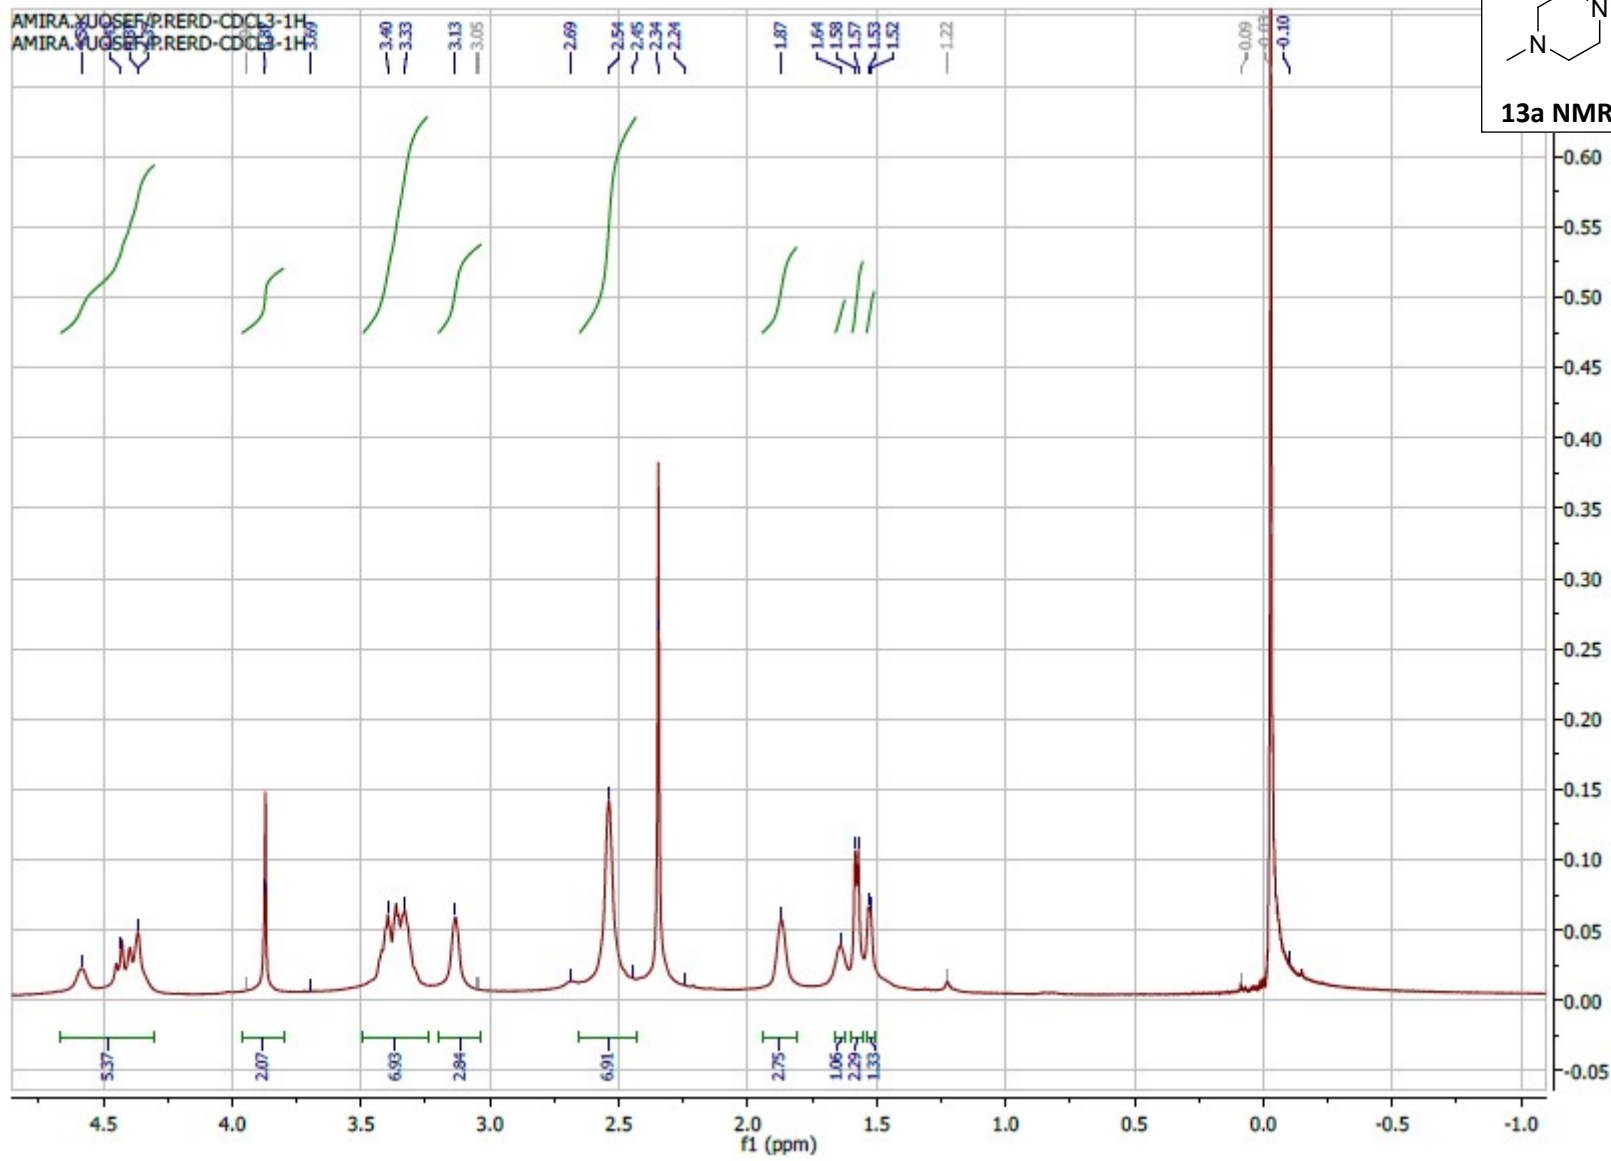

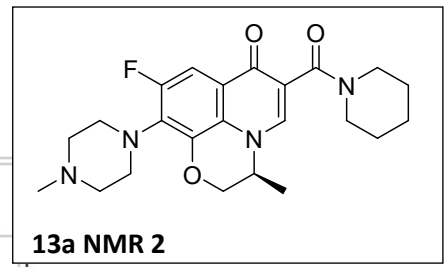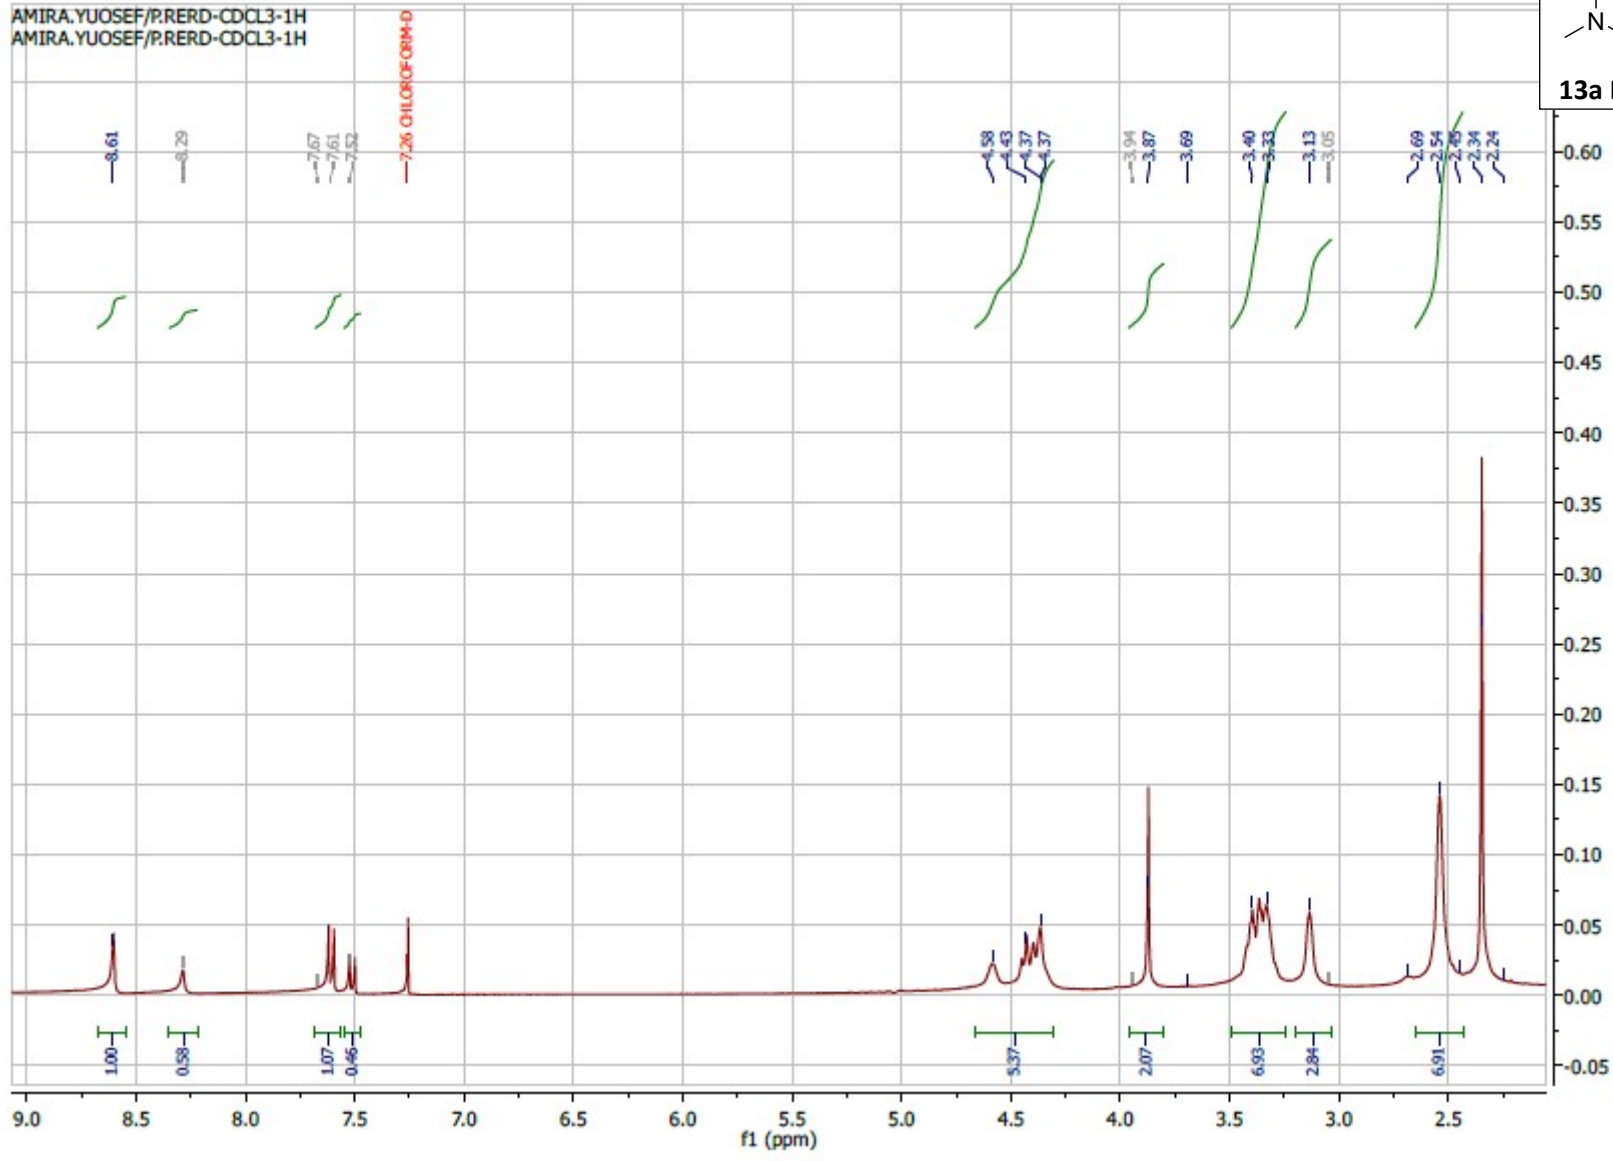

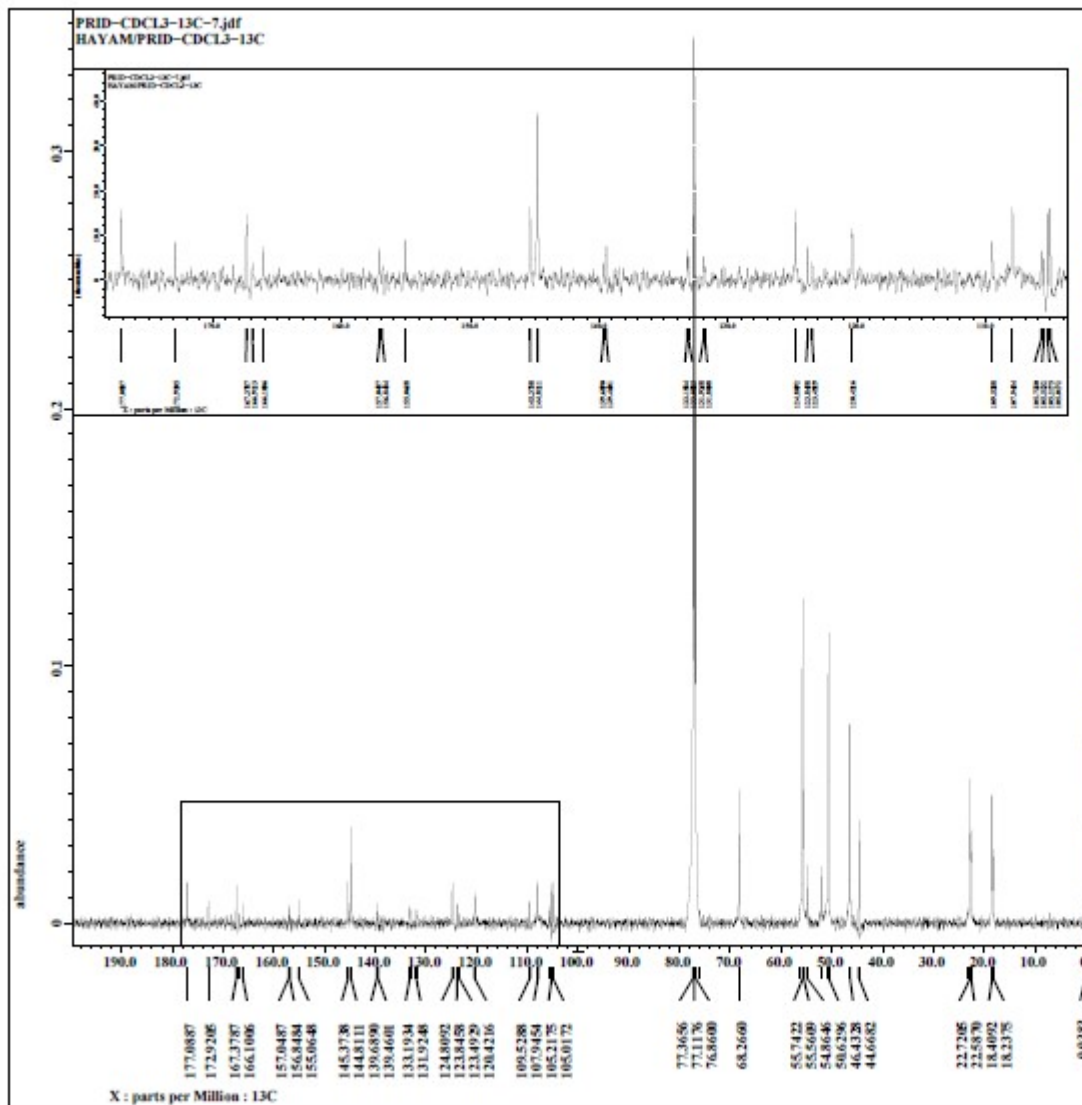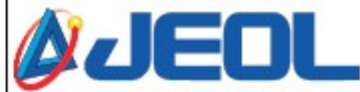

```

Author           = delta3
Content          = HAYAM/PRID-CDCL3
Creation time    = 13-SEP-2022 20:0
Current time     = 13-SEP-2022 13:1
Data format     = 1D REAL
Dir_wise        = 26214
Dir_title       = 13c
Dir_units       = [ppm]
Dimensions      = X
Filename        = PRID-CDCL3-13c-7
Machine         = scc
Revision time   = 13-SEP-2022 13:0
Sample id       = HAYAM/PRID-CDCL3
Site           = SCS500 (Datum BL)
Spectrometer    = DELTA2_NMR
Scans          = 1680
Mod_return      = 1
Total scans     = 1680
X points        = 32768
X prescans     = 4
X domain       = 43c
X offset       = 100 [ppm]
X freq         = 125.76529768 [MHz]
X sweep        = 39.3081761 [kHz]
X resolution   = 1.19959034 [Hz]
Irr domain     = 1M
Irr offset     = 0.0 [ppm]
Irr_freq      = 500.13591521 [MHz]
X_acq duration = 0.83361792 [s]
Digital filter = TRM
Filter factor   = 8
AI version     = 1
Delay of start = 1.99999974 [s]
Actual start time = 13-SEP-2022 20:0
Acq delay      = 20.67 [us]
Digital filter status = 2P
Clipped        = FALSE
Dc balanced    = FALSE
X90            = 13 [us]
Irr90          = 12 [us]
Tri90          = 10 [us]
Qua90         = 10 [us]
Qui90         = 10 [us]
Sex90         = 10 [us]
Sep90         = 10 [us]
Oct90         = 10 [us]
Mon90         = 10 [us]
Dec90         = 10 [us]
X90_hi        = 0.118 [us]
Irr90_hi      = 92 [us]
Tri90_hi      = 10 [us]
Qua90_hi     = 10 [us]
Qui90_hi     = 10 [us]
Sex90_hi     = 10 [us]
Sep90_hi     = 10 [us]
Oct90_hi     = 10 [us]
Mon90_hi     = 10 [us]
Dec90_hi     = 10 [us]
X90_lo        = 0.118 [us]
Irr90_lo      = 92 [us]
Tri90_lo      = 10 [us]
Qua90_lo     = 10 [us]
Qui90_lo     = 10 [us]
Sex90_lo     = 10 [us]
Sep90_lo     = 10 [us]
Oct90_lo     = 10 [us]
Mon90_lo     = 10 [us]
Dec90_lo     = 10 [us]
X90_wpin     = 1 [us]
Irr90_wpin   = 38 [us]
  
```

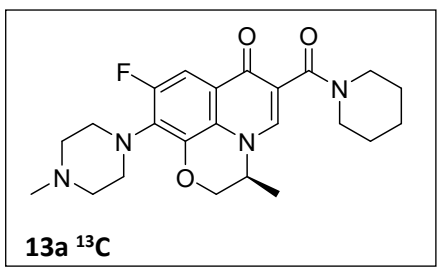

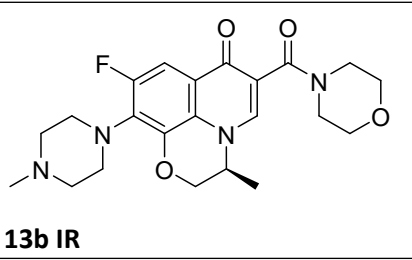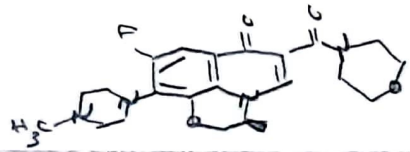

SHIMADZU

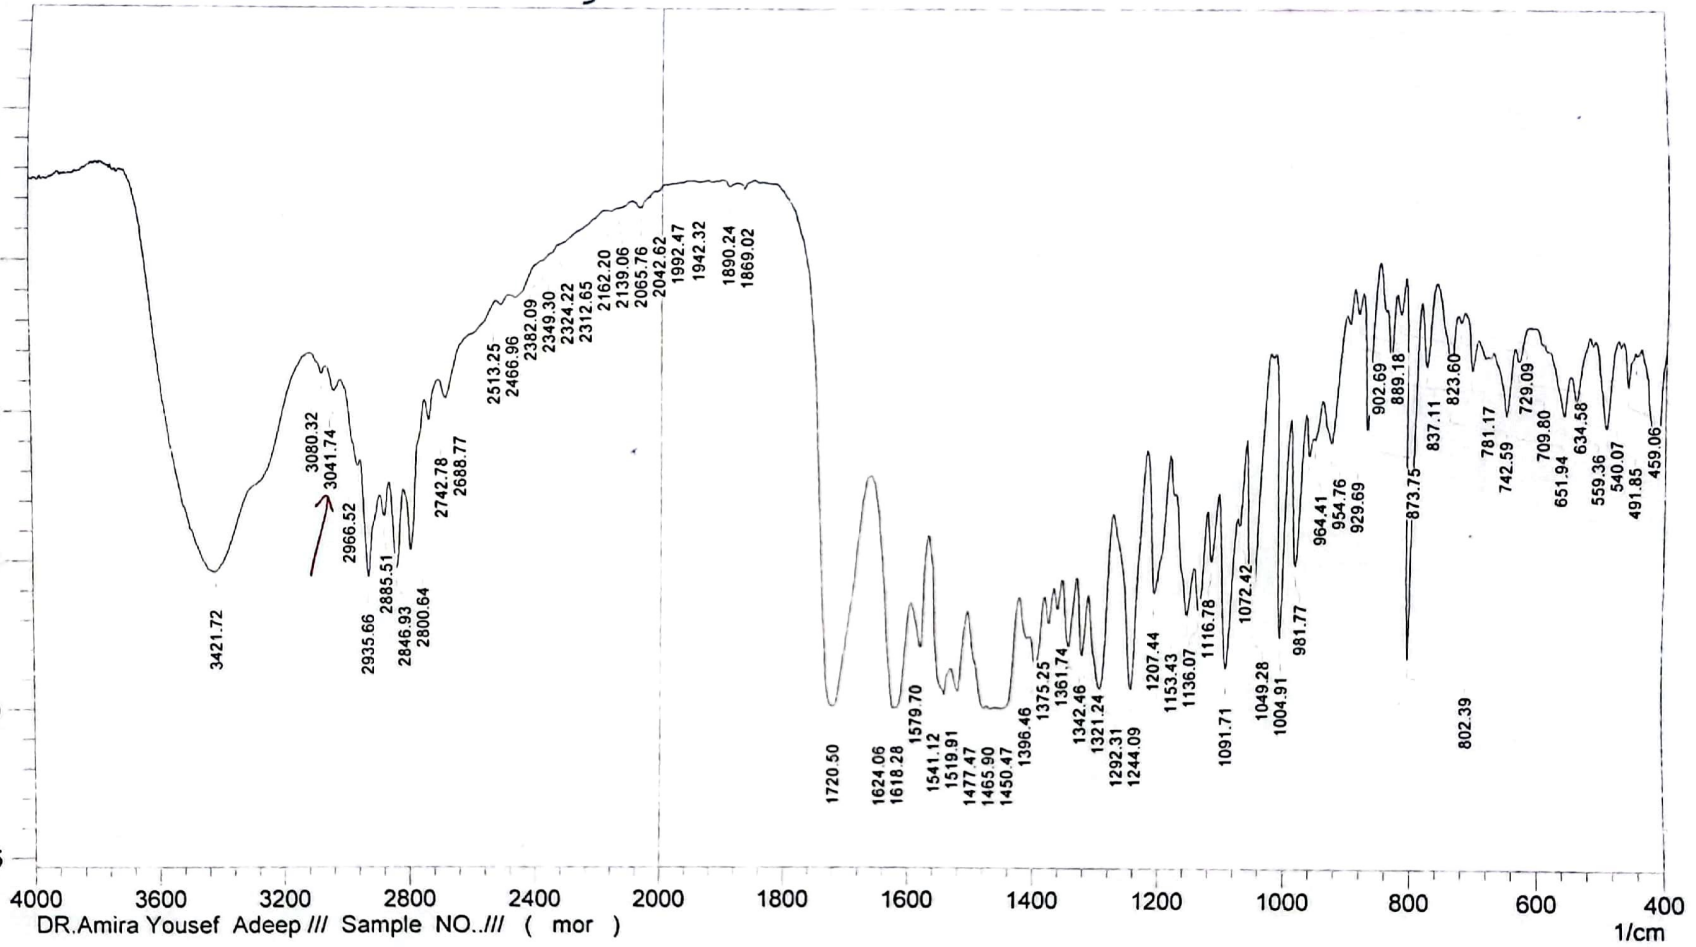







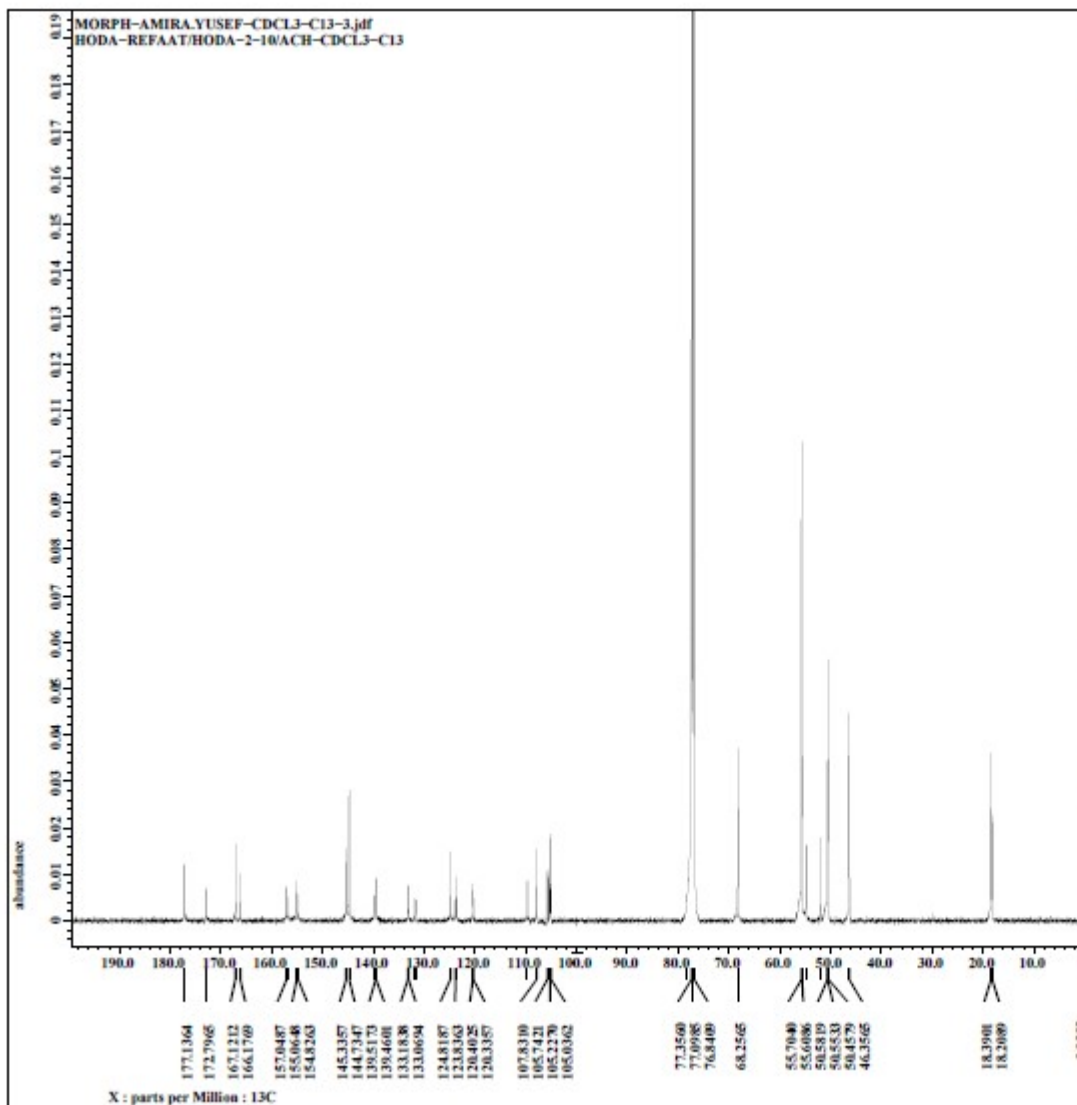

**JEOL**

```

Author          = delta3
Content         = HODA-REFAAT/HODA
Creation time   = 4-OCT-2022 16:3
Current time    = 4-OCT-2022 08:3
Data Format     = 1D_NMR
Dir size       = 26234
Dir title      = 13c
Dir units      = [ppm]
Dimensions     = X
Filename       = MORPH-AMIRA.YUSEF
Machine        = *cc
Revision time   = 4-OCT-2022 08:3
Sample_id      = HODA-REFAAT/HODA
Site           = NCA500 (Datum HL
Spectrometer   = DELTA2 500
Scans          = 20937
Mod return     = 1
Total scans    = 20937
X points       = 32768
X prescans     = 4
X domain       = 13c
X offset       = 100 [ppm]
X freq         = 125.76529768 [MHz]
X sweep        = 39.3081761 [kHz]
X resolution   = 1.19959034 [Hz]
Irr domain     = 1H
Irr offset     = 5.0 [ppm]
Irr freq       = 500.15901521 [MHz]
X acq duration = 0.83361792 [s]
Digital filter = TRUM
Filter factor   = 8
AE version     = 1
Delay of start = 1.99999974 [s]
Actual start time = 4-OCT-2022 16:3
Acq delay      = 20.67 [us]
Digital filter status = 2P
Clipped        = TRUM
Dc balanced    = FALSE
X90            = 13 [us]
Irr90          = 12 [us]
Tr190          = 10 [us]
Que90          = 10 [us]
Qui90          = 10 [us]
Sex90          = 10 [us]
Sep90          = 10 [us]
Oct90          = 10 [us]
Mon90          = 10 [us]
Dec90          = 10 [us]
X90 hi         = 0.118 [ms]
Irr90 hi       = 92 [us]
Tr190 hi       = 10 [us]
Que90 hi       = 10 [us]
Qui90 hi       = 10 [us]
Sex90 hi       = 10 [us]
Sep90 hi       = 10 [us]
Oct90 hi       = 10 [us]
Mon90 hi       = 10 [us]
Dec90 hi       = 10 [us]
X90 lo         = 0.118 [ms]
Irr90 lo       = 92 [us]
Tr190 lo       = 10 [us]
Que90 lo       = 10 [us]
Qui90 lo       = 10 [us]
Sex90 lo       = 10 [us]
Sep90 lo       = 10 [us]
Oct90 lo       = 10 [us]
Mon90 lo       = 10 [us]
Dec90 lo       = 10 [us]
X90 spin       = 1 [us]
Irr90 spin     = 38 [us]

```

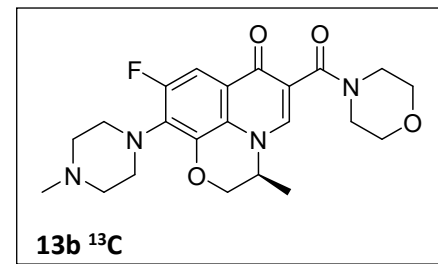

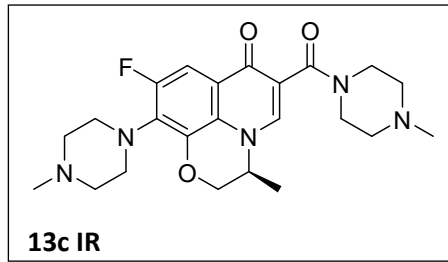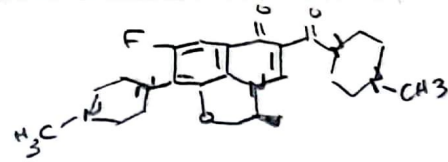

SHIMADZU

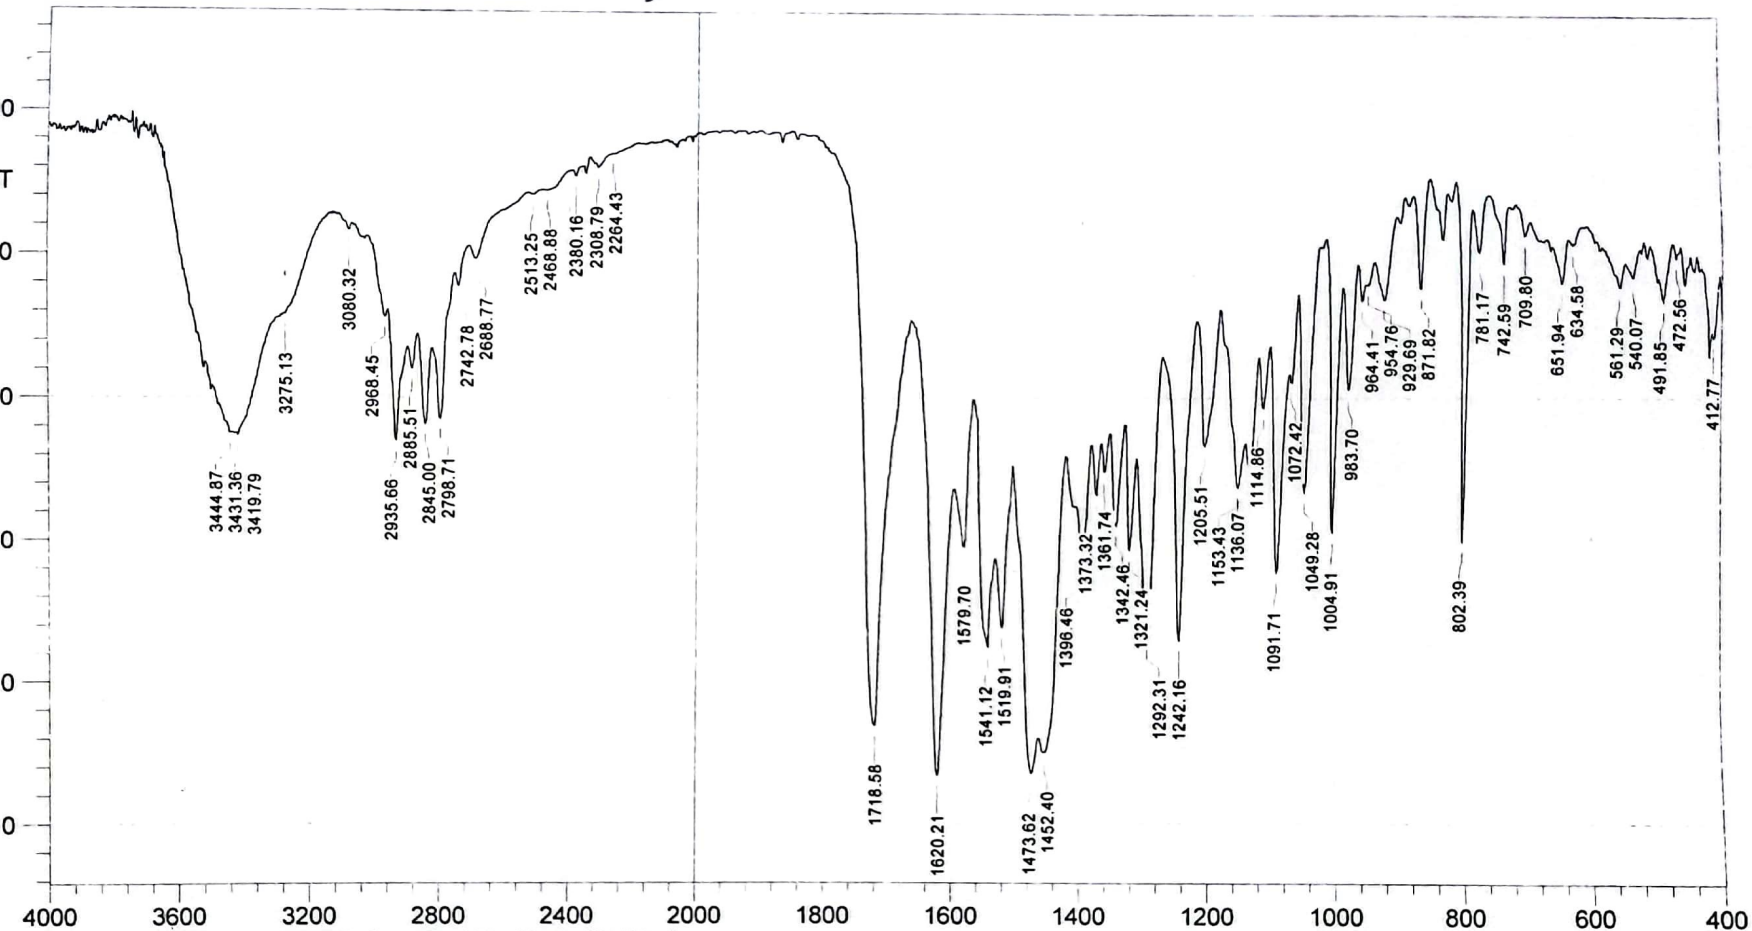

AMIRA.YUOSEF/M-PP-CDCL3-1H  
AMIRA.YUOSEF/M-PP-CDCL3-1H

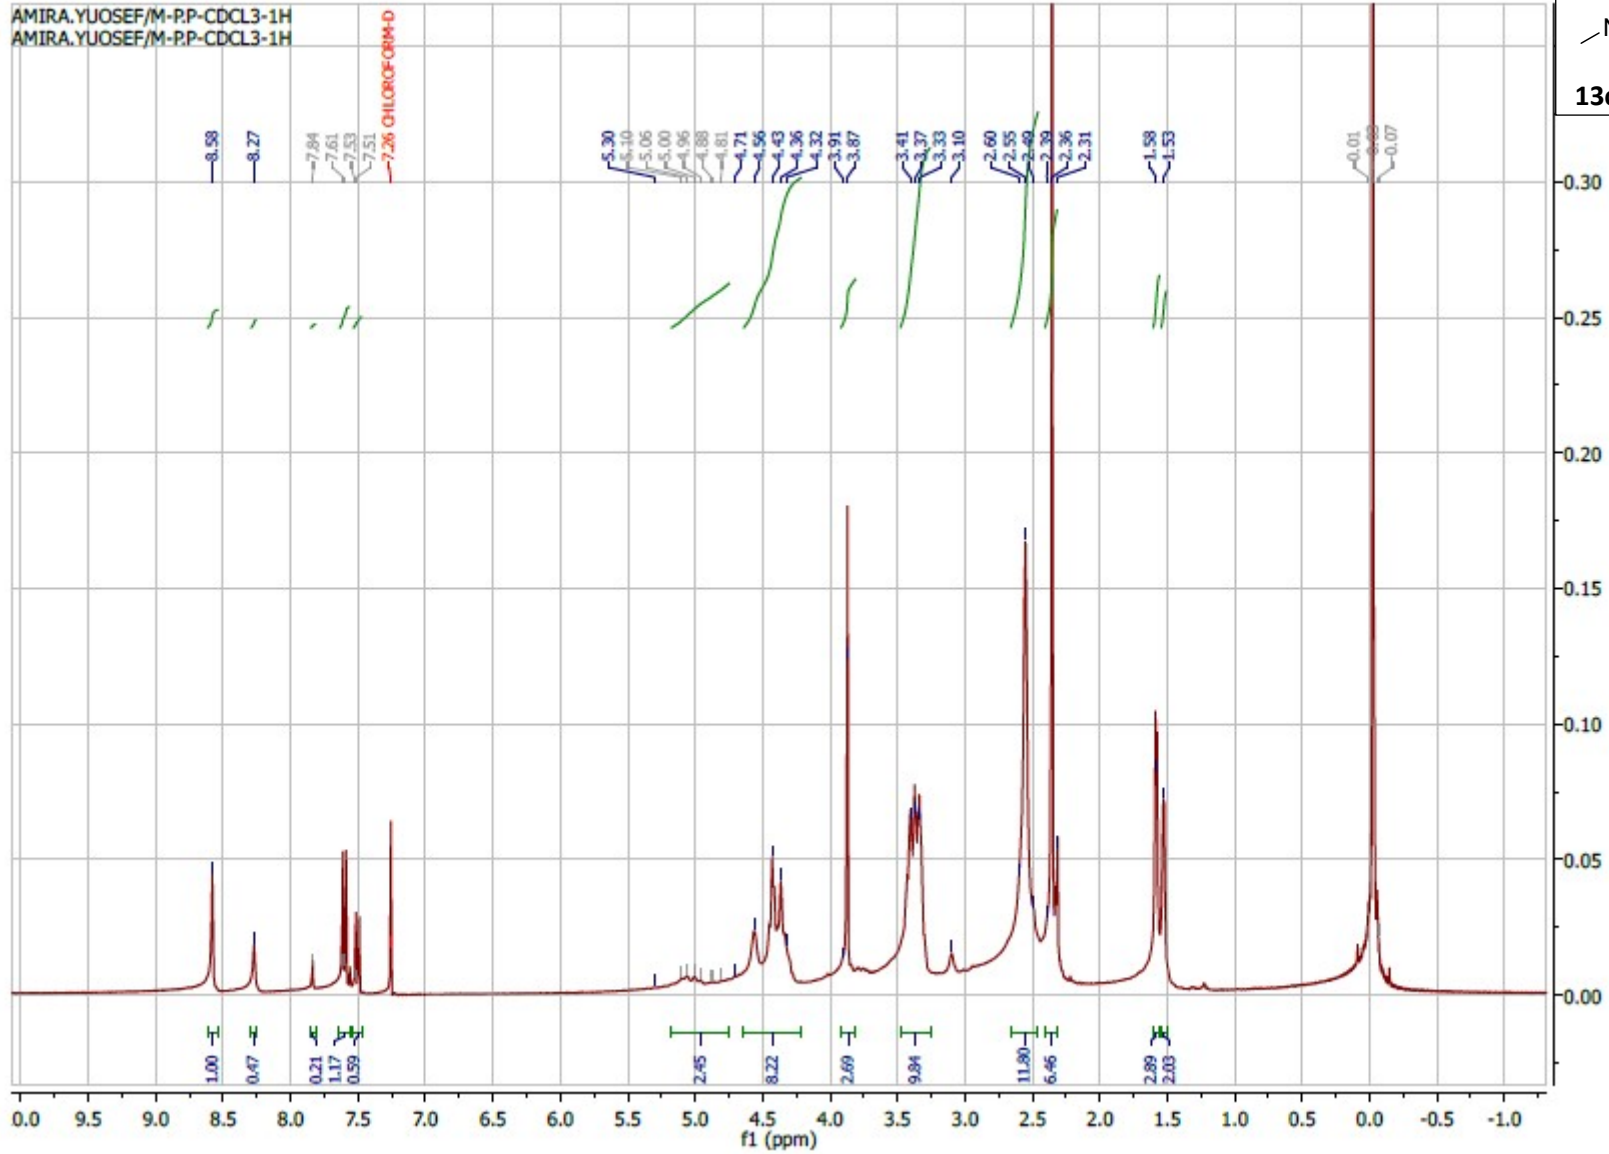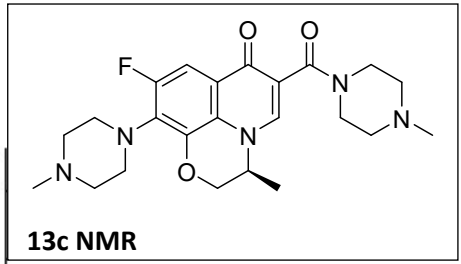

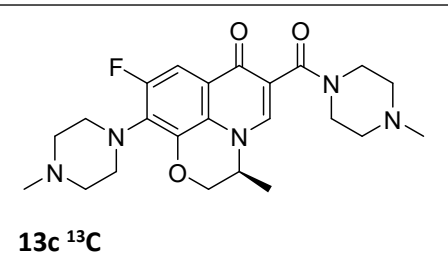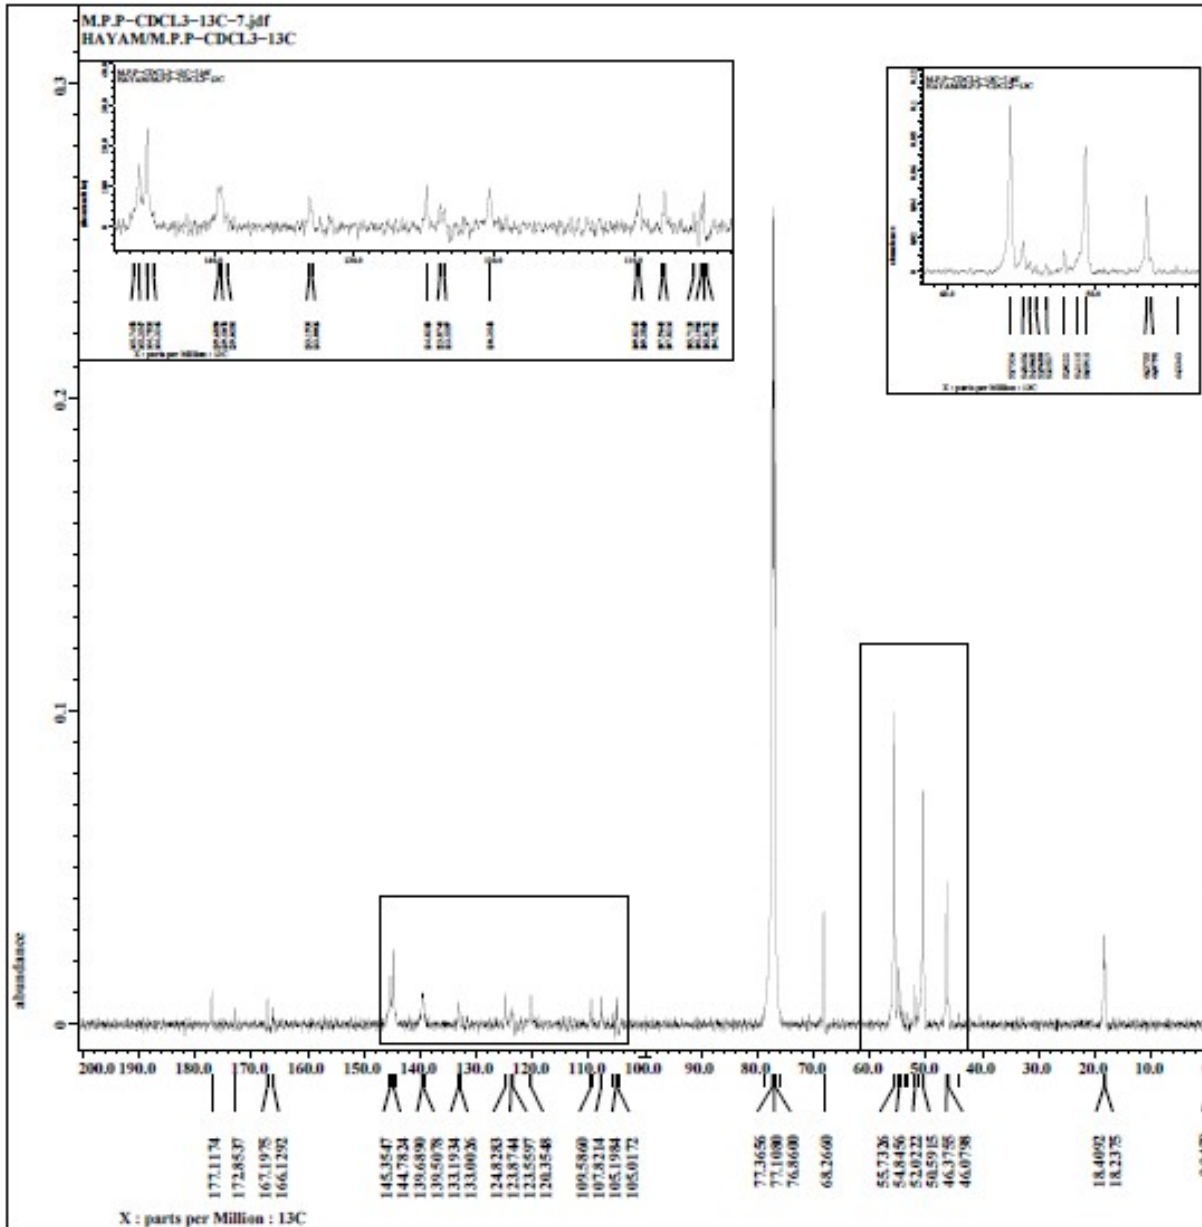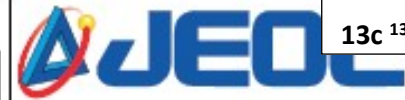

|                       |                      |
|-----------------------|----------------------|
| Author                | = delta3             |
| Content               | = HAYAM/M.P.P-CDCL   |
| Creation time         | = 13-SEP-2022 21:5   |
| Current time          | = 14-SEP-2022 10:0   |
| Data format           | = 1D_REAL            |
| Dim size              | = 26214              |
| Dim title             | = 13c                |
| Dim units             | = [ppm]              |
| Dimensions            | = X                  |
| Filename              | = M.P.P-CDCL3-13C-   |
| Machine               | = wco                |
| Revision time         | = 14-SEP-2022 10:0   |
| Sample id             | = HAYAM/M.P.P-CDCL   |
| Site                  | = MCA500 (Datum BL   |
| Spectrometer          | = DELTA2_NMR         |
| Scans                 | = 2315               |
| Mod return            | = 1                  |
| Total scans           | = 2315               |
| X points              | = 32768              |
| X prescans            | = 4                  |
| X domain              | = 13c                |
| X offset              | = 100 [ppm]          |
| X freq                | = 125.76529768 [MHz] |
| X sweep               | = 39.3081761 [kHz]   |
| X resolution          | = 1.19959034 [Hz]    |
| Irr domain            | = 1M                 |
| Irr offset            | = 5.0 [ppm]          |
| Irr freq              | = 500.15991521 [MHz] |
| X acq duration        | = 0.83361792 [s]     |
| Digital filter        | = TR0X               |
| Filter factor         | = 8                  |
| AF version            | = 1                  |
| Delay of start        | = 1.99999974 [s]     |
| Actual start time     | = 13-SEP-2022 21:5   |
| Acq delay             | = 20.67 [us]         |
| Digital filter status | = 2F                 |
| Clipped               | = TR0X               |
| De balanced           | = FALSE              |
| X90                   | = 13 [us]            |
| Irr90                 | = 12 [us]            |
| Tr190                 | = 10 [us]            |
| Qua90                 | = 10 [us]            |
| Qui90                 | = 10 [us]            |
| Sex90                 | = 10 [us]            |
| Sep90                 | = 10 [us]            |
| Oct90                 | = 10 [us]            |
| Non90                 | = 10 [us]            |
| Dec90                 | = 10 [us]            |
| X90 hi                | = 0.118 [ms]         |
| Irr90 hi              | = 92 [us]            |
| Tr190 hi              | = 10 [us]            |
| Qua90 hi              | = 10 [us]            |
| Qui90 hi              | = 10 [us]            |
| Sex90 hi              | = 10 [us]            |
| Sep90 hi              | = 10 [us]            |
| Oct90 hi              | = 10 [us]            |
| Non90 hi              | = 10 [us]            |
| Dec90 hi              | = 10 [us]            |
| X90 lo                | = 0.118 [ms]         |
| Irr90 lo              | = 92 [us]            |
| Tr190 lo              | = 10 [us]            |
| Qua90 lo              | = 10 [us]            |
| Qui90 lo              | = 10 [us]            |
| Sex90 lo              | = 10 [us]            |
| Sep90 lo              | = 10 [us]            |
| Oct90 lo              | = 10 [us]            |
| Non90 lo              | = 10 [us]            |
| Dec90 lo              | = 10 [us]            |
| X90 wpin              | = 1 [us]             |
| Irr90 wpin            | = 38 [us]            |

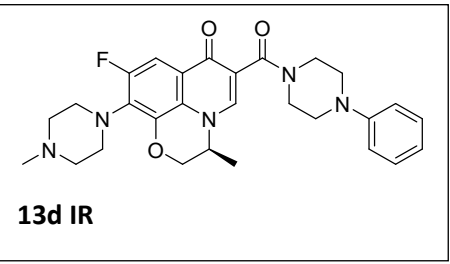

SHIMADZU

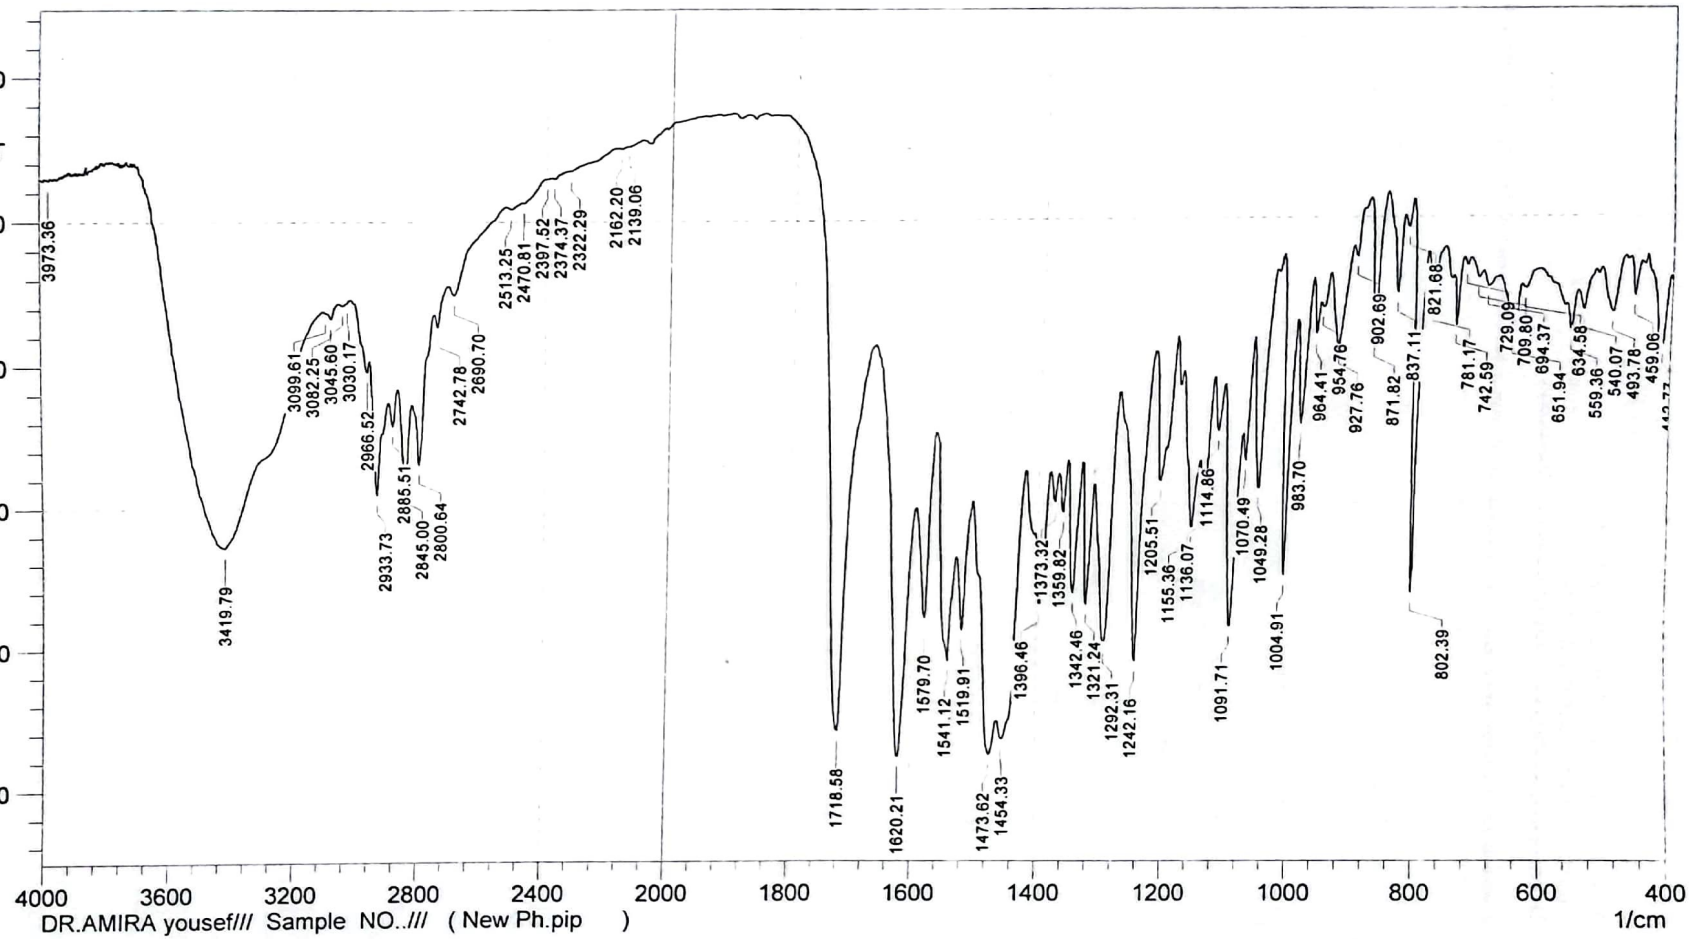



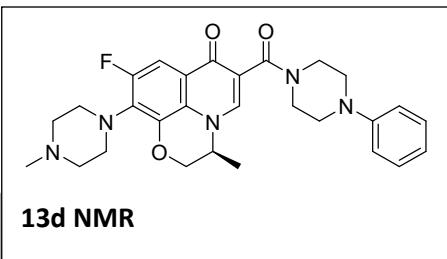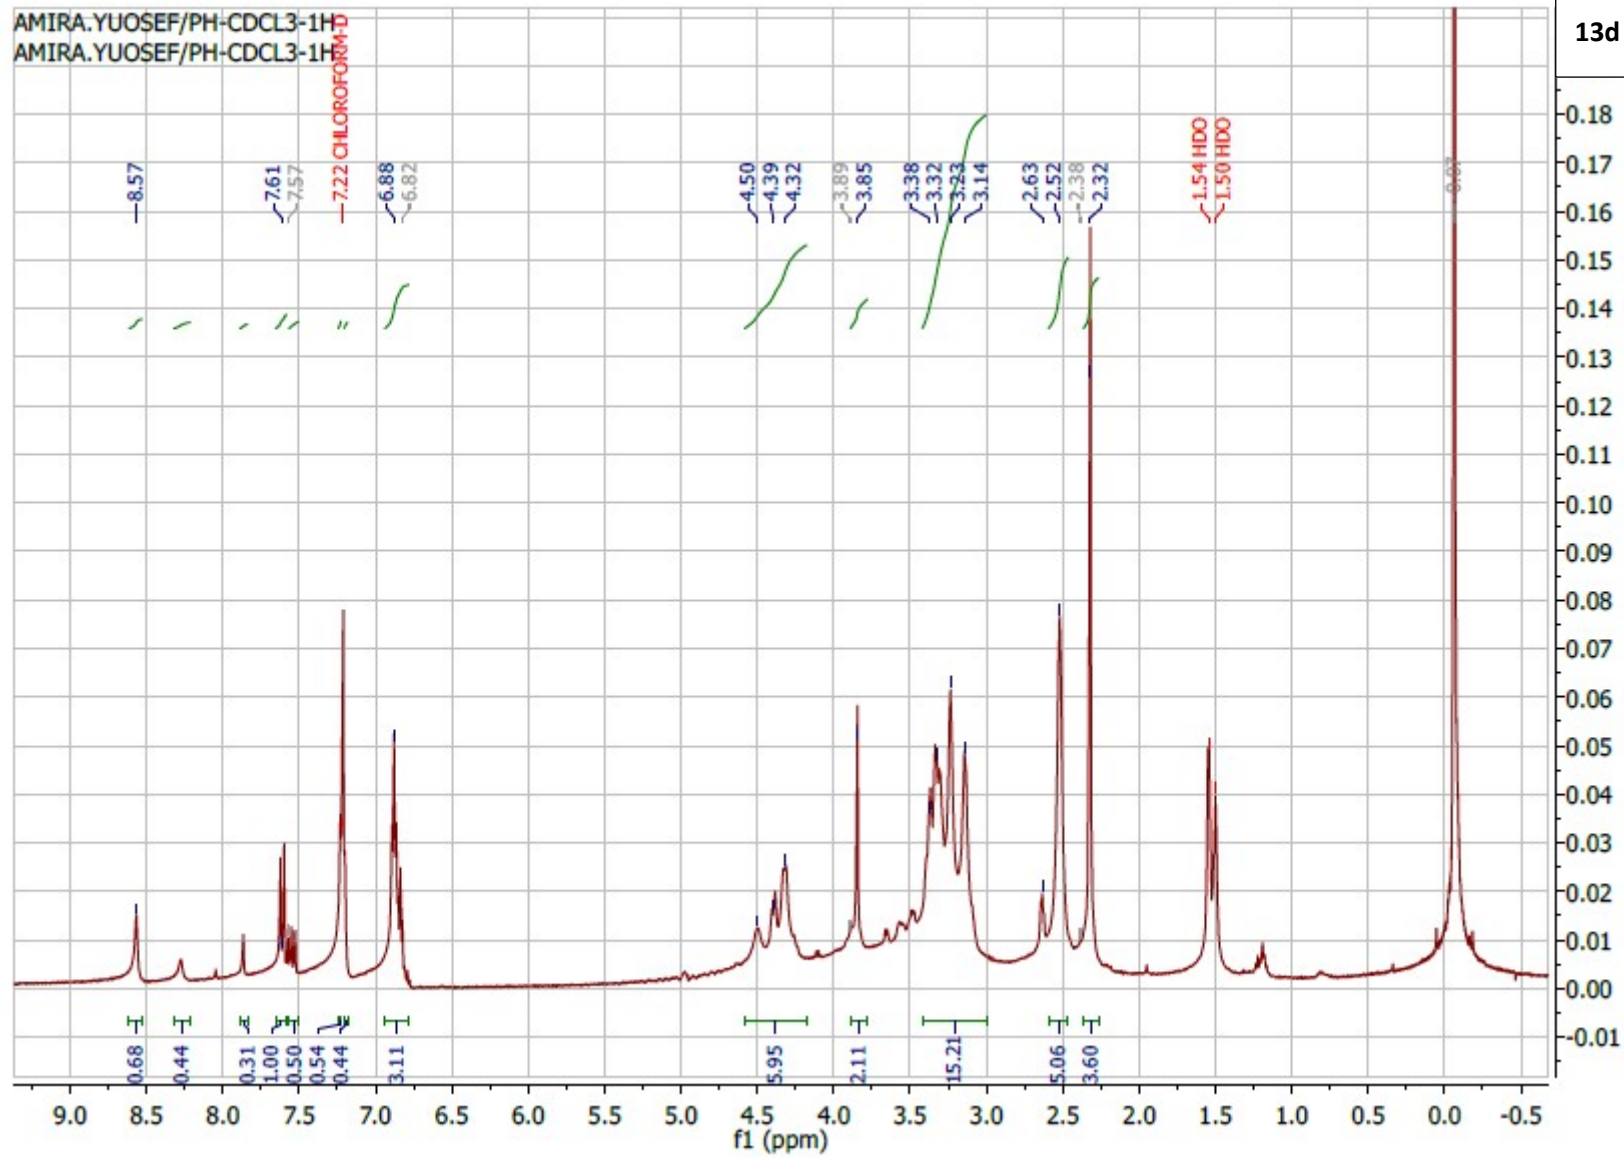

PH-CDCL3-13C  
PH-CDCL3-13C

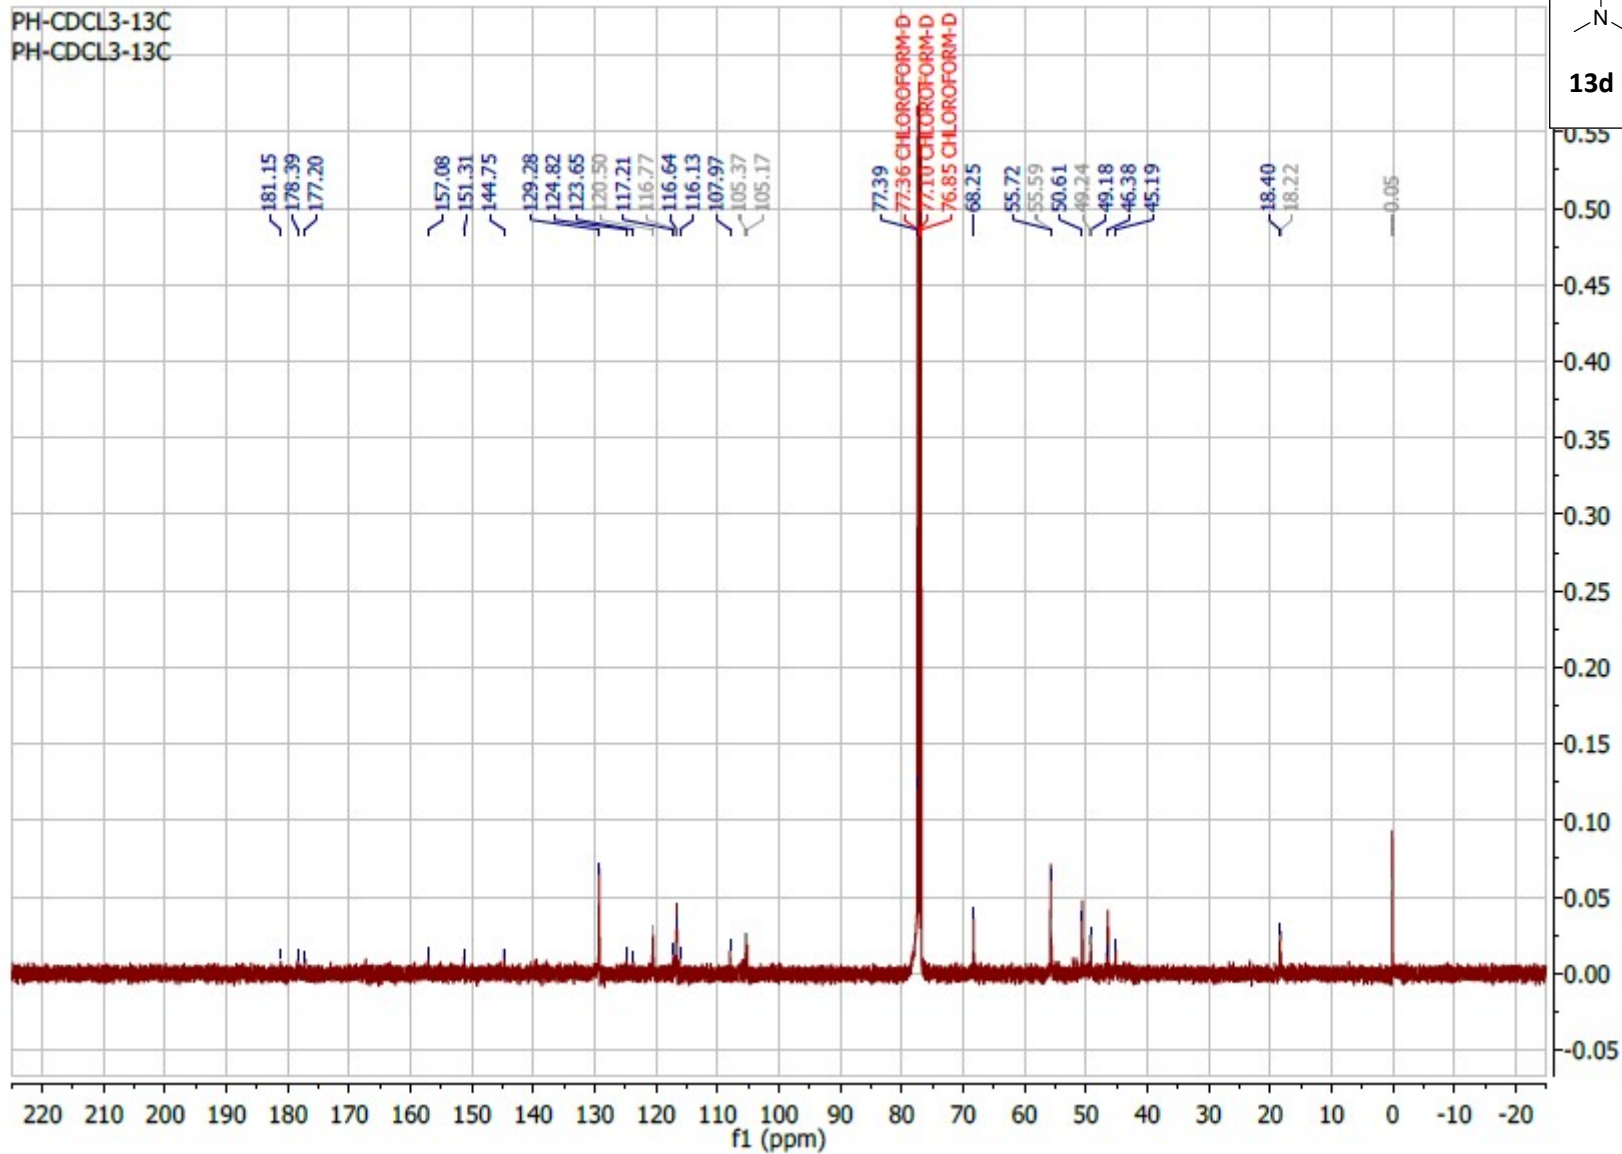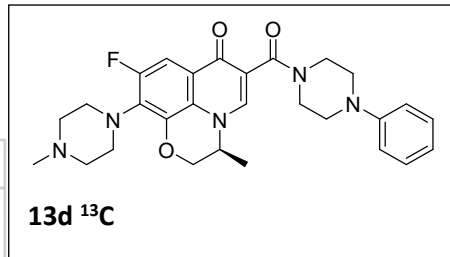



**Al-Azhar University**  
**The Regional Center for Mycology and Biotechnology**

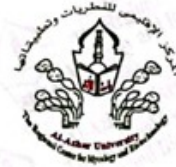

**Requester Data:**

Name: Dr. Amira Youssef Adib  
Authority: Faculty of Pharmacy,  
Misr University for Science and Technology University

**Sample Data:**

Sixteen samples had been submitted for elemental analysis.

**Analysis Report:**

| Sample Code | C%    | H%   | N%    |
|-------------|-------|------|-------|
| 3a          | 60.47 | 5.28 | 14.32 |
| 3b          | 62.59 | 5.35 | 14.81 |
| 3c          | 63.04 | 5.91 | 14.47 |
| 4a          | 61.73 | 5.12 | 16.80 |
| 4b          | 53.72 | 4.39 | 14.67 |
| 4c          | 57.80 | 4.63 | 15.73 |
| 5           | 59.41 | 6.12 | 14.50 |
| 6           | 59.80 | 6.13 | 16.03 |
| 7           | 57.23 | 5.40 | 19.17 |
| 8           | 57.09 | 5.14 | 15.83 |
| 9           | 61.52 | 4.95 | 14.09 |
| 10          | 52.79 | 5.61 | 19.12 |
| 11a         | 56.30 | 4.87 | 15.26 |
| 11b         | 58.92 | 5.46 | 15.39 |
| 12a         | 59.47 | 5.62 | 15.04 |
| 12b         | 58.50 | 5.69 | 14.31 |

INVESTIGATOR

DIRECTOR

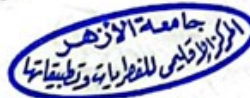

Al-Azhar University Campus - Nasr City, Cairo, Egypt.  
Tel: 0202 22620373 Fax : 0202 22620373  
E.mail:rcmb@azhar.edu.eg  
Website: <http://www.azhar.edu.eg.htm> \* [http://www.azhar.edu.eg/pages/fungi\\_center.htm](http://www.azhar.edu.eg/pages/fungi_center.htm)  
Facebook : RCMB AZHAR P.O. box mail : 11751 Nasr City Cairo, Egypt.

**Al-Azhar University**  
**The Regional Center for Mycology and Biotechnology**

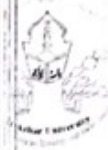

**Requester Data:**

Name: Dr. Amira Youssef

Authority: Misr University for Science and Technology University

**Sample Data:**

Four samples had been submitted for elemental analysis.

**Analysis Report:**

| Sample Code | C%    | H%   | N%    |
|-------------|-------|------|-------|
| 13a         | 64.70 | 6.95 | 13.31 |
| 13b         | 61.60 | 6.46 | 13.29 |
| 13c         | 62.58 | 7.10 | 16.05 |
| 13d         | 66.41 | 6.52 | 14.11 |

INVESTIGATOR

DIRECTOR

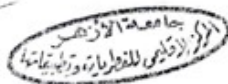

Al-Azhar University Campus - Nasr City, Cairo, Egypt.  
Tel: 0202 22620373 Fax : 0202 22620373  
E-mail: [rcmb@azhar.edu.eg](mailto:rcmb@azhar.edu.eg)  
Website: <http://www.azhar.edu.eg.htm> \* [http://www.azhar.edu.eg/pages/fungi\\_center.htm](http://www.azhar.edu.eg/pages/fungi_center.htm)  
Facebook : RCMB AZHAR P.O. box mail : 11751 Nasr City Cairo, Egypt.

RT: 0.72 - 1.23 SM: 15B

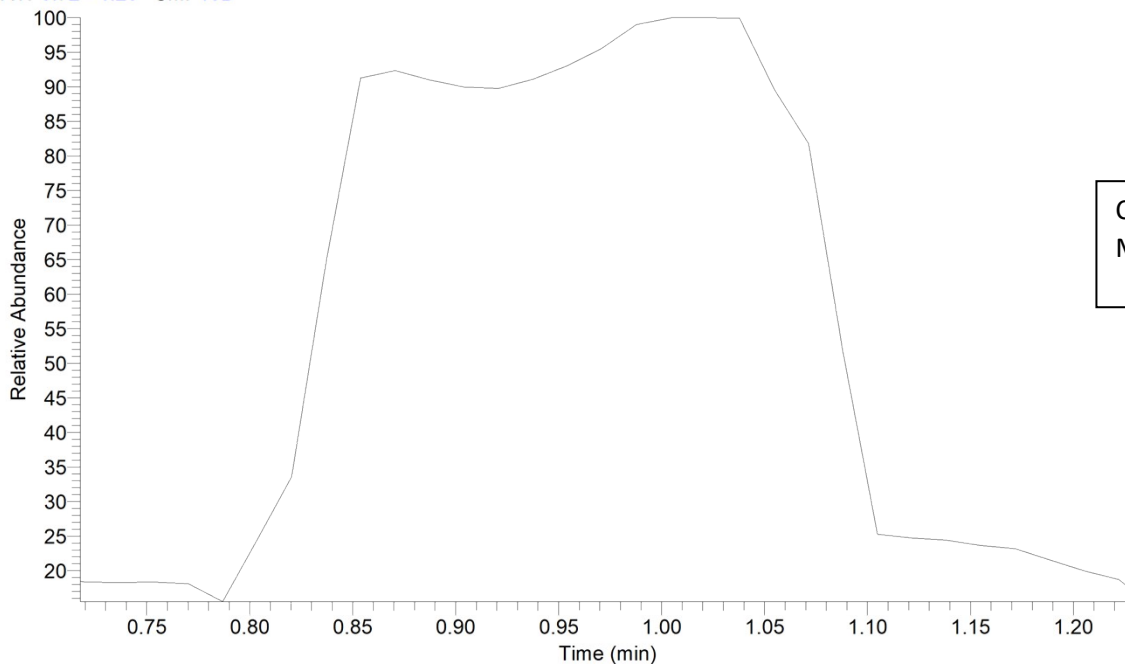

NL:  
1.45E4  
TIC MS  
Amira-Usif-  
11

Compound 9  
Mwt= 505.51

Amira-Usif-11 #217 RT: 3.65 AV: 1 SB: 6 2.79 , 2.48-2.54 NL: 2.93E2  
T: + c EI Full ms [40.00-1000.00]

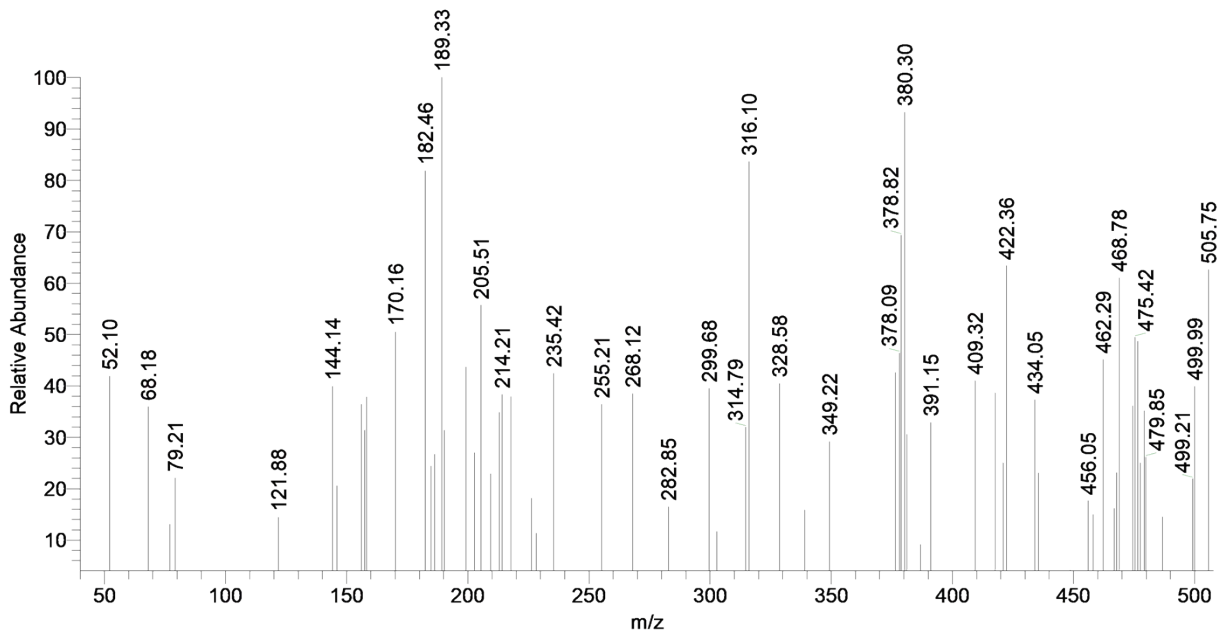

m/z Intensity Relative

|        |       |       |
|--------|-------|-------|
| 52.10  | 122.8 | 41.96 |
| 68.18  | 105.3 | 35.98 |
| 77.08  | 38.3  | 13.08 |
| 79.21  | 64.8  | 22.13 |
| 121.88 | 42.3  | 14.44 |

|        |       |        |
|--------|-------|--------|
| 144.14 | 117.0 | 39.97  |
| 145.93 | 60.4  | 20.65  |
| 156.11 | 106.7 | 36.45  |
| 157.34 | 91.9  | 31.39  |
| 158.34 | 110.7 | 37.81  |
| 170.16 | 147.9 | 50.52  |
| 182.46 | 239.6 | 81.87  |
| 184.84 | 71.3  | 24.37  |
| 186.34 | 78.0  | 26.65  |
| 189.33 | 292.6 | 100.00 |
| 190.40 | 91.9  | 31.39  |
| 199.20 | 127.9 | 43.71  |
| 202.82 | 78.9  | 26.97  |
| 205.51 | 163.1 | 55.72  |
| 209.48 | 67.1  | 22.92  |
| 213.05 | 102.0 | 34.85  |
| 214.21 | 112.3 | 38.36  |
| 217.77 | 111.1 | 37.98  |
| 226.28 | 53.1  | 18.13  |
| 228.21 | 33.4  | 11.41  |
| 235.42 | 124.4 | 42.51  |
| 255.21 | 106.8 | 36.49  |
| 268.12 | 112.7 | 38.50  |
| 282.85 | 48.3  | 16.51  |
| 299.68 | 115.6 | 39.51  |
| 302.77 | 34.2  | 11.70  |
| 314.79 | 93.6  | 31.98  |
| 316.10 | 244.8 | 83.64  |
| 328.58 | 118.6 | 40.52  |
| 339.12 | 46.5  | 15.88  |
| 349.22 | 85.4  | 29.18  |

|        |       |       |
|--------|-------|-------|
| 376.41 | 124.7 | 42.60 |
| 378.09 | 136.0 | 46.47 |
| 378.82 | 203.0 | 69.35 |
| 380.30 | 272.9 | 93.26 |
| 381.20 | 89.5  | 30.57 |
| 386.94 | 26.8  | 9.16  |
| 391.15 | 96.3  | 32.89 |
| 409.32 | 120.0 | 41.02 |
| 417.60 | 113.2 | 38.68 |
| 421.03 | 73.2  | 25.03 |
| 422.36 | 185.5 | 63.39 |
| 434.05 | 109.2 | 37.31 |
| 435.62 | 67.6  | 23.08 |
| 448.73 | 12.0  | 4.10  |
| 456.05 | 51.7  | 17.66 |
| 458.05 | 44.0  | 15.04 |
| 462.29 | 132.1 | 45.15 |
| 466.86 | 47.2  | 16.13 |
| 467.79 | 67.7  | 23.14 |
| 468.78 | 178.7 | 61.06 |
| 474.51 | 105.8 | 36.17 |
| 475.42 | 144.8 | 49.48 |
| 476.46 | 142.5 | 48.70 |
| 477.46 | 73.3  | 25.06 |
| 479.27 | 102.9 | 35.17 |
| 479.85 | 76.5  | 26.15 |
| 486.70 | 42.6  | 14.55 |
| 499.21 | 64.1  | 21.91 |
| 499.99 | 116.8 | 39.91 |
| 505.75 | 183.2 | 62.61 |

RT: 1.09 - 1.65 SM: 15B

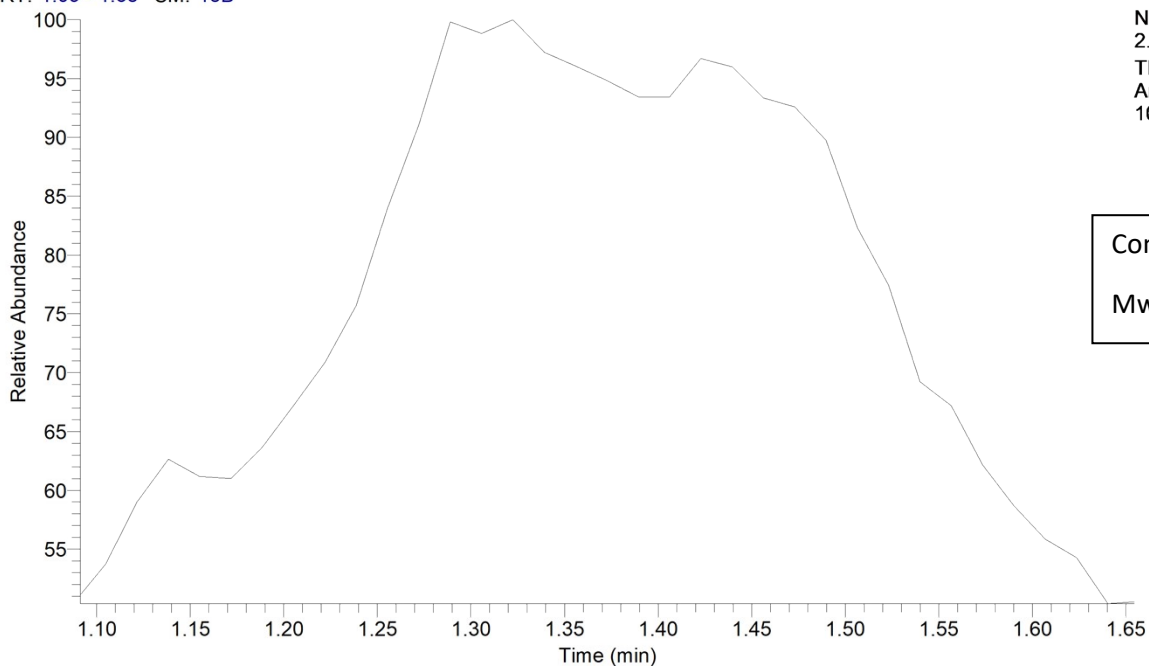

Amira-Usif-10 #67-68 RT: 1.14-1.15 AV: 2 SB: 2 2.33 , 2.33 NL: 1.80E2  
T: + c EI Full ms [40.00-1000.00]

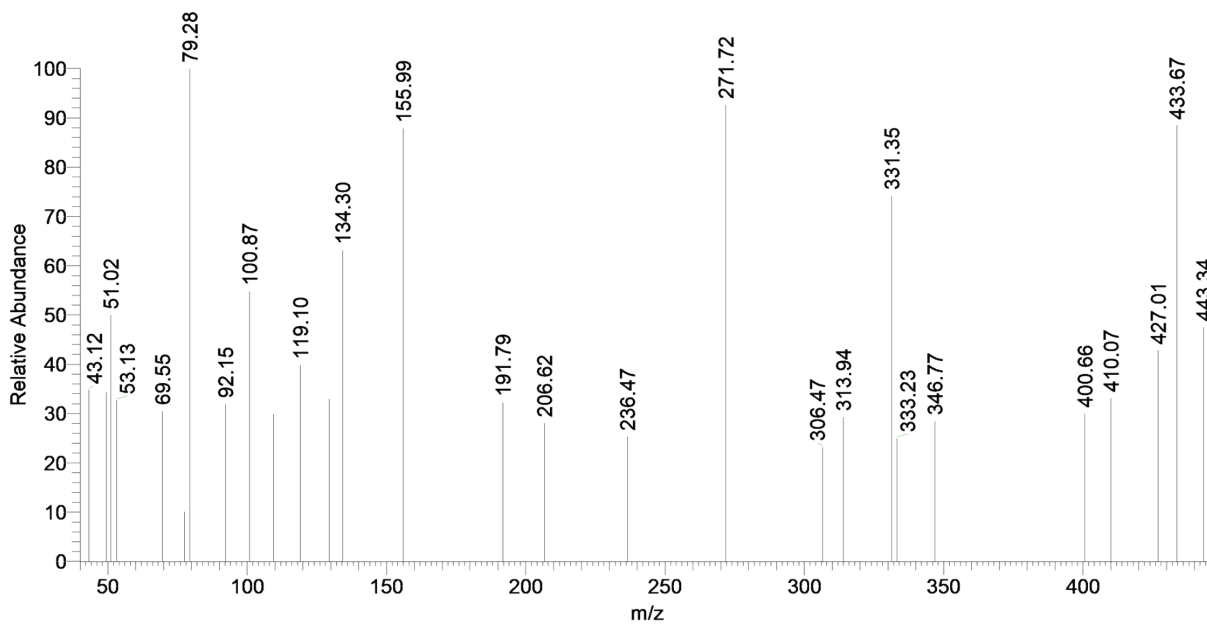

m/z Intensity Relative

|       |      |       |
|-------|------|-------|
| 43.12 | 62.6 | 34.82 |
| 49.36 | 61.7 | 34.33 |
| 51.02 | 89.8 | 49.94 |
| 53.13 | 58.8 | 32.70 |
| 69.55 | 54.9 | 30.55 |

|        |       |        |
|--------|-------|--------|
| 77.52  | 18.2  | 10.12  |
| 79.28  | 179.8 | 100.00 |
| 92.15  | 57.5  | 31.96  |
| 100.87 | 98.5  | 54.76  |
| 109.41 | 53.9  | 29.96  |
| 119.10 | 71.5  | 39.78  |
| 129.42 | 59.3  | 33.00  |
| 134.30 | 113.5 | 63.11  |
| 155.99 | 157.9 | 87.80  |
| 191.79 | 58.0  | 32.26  |
| 206.62 | 50.4  | 28.03  |
| 236.47 | 45.5  | 25.32  |
| 271.72 | 166.7 | 92.70  |
| 306.47 | 41.7  | 23.17  |
| 313.94 | 52.7  | 29.29  |
| 331.35 | 133.3 | 74.16  |
| 333.23 | 44.9  | 24.99  |
| 346.77 | 51.2  | 28.48  |
| 400.66 | 54.0  | 30.03  |
| 410.07 | 59.6  | 33.15  |
| 427.01 | 77.0  | 42.83  |
| 433.67 | 159.1 | 88.47  |
| 443.34 | 85.4  | 47.50  |



## HPLC purity for compound 5

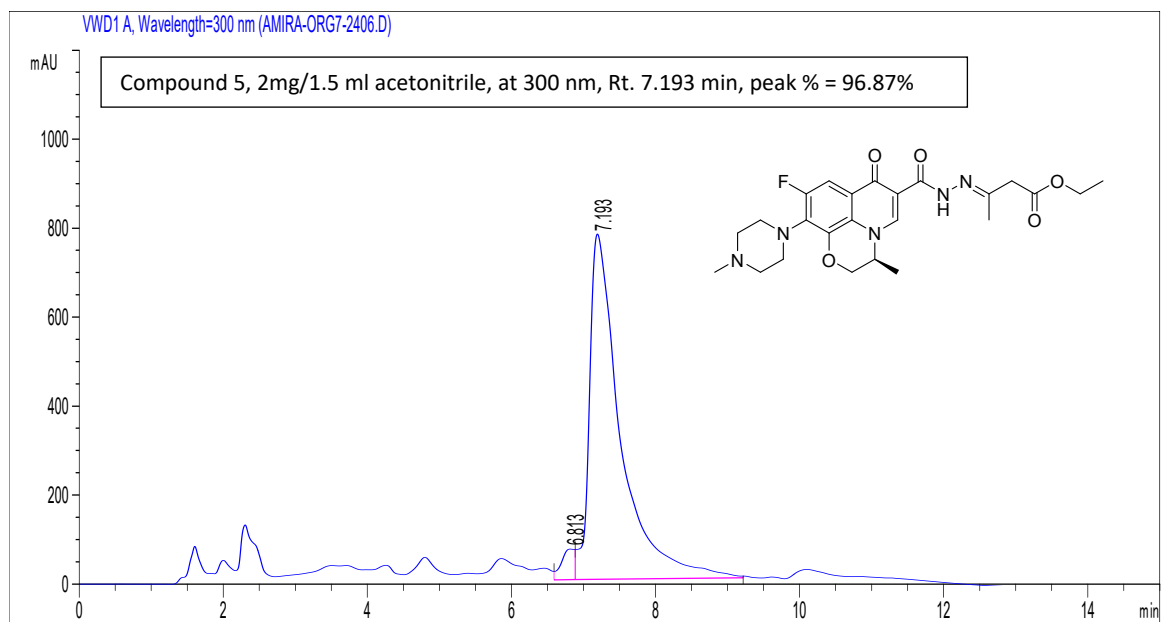

Supplement: RA-014-D4RA03975K-s001.pdf [file RA-014-D4RA03975K-s001.pdf]
